# Supplementary material for: A new transient directing group diethoxyethyl- l -proline facilitates ortho -arylation of aryl-amines/-amino acids via Pd-catalyzed C(sp 2 )–H activation
Source: Royal Society of Chemistry journal article supplement (doi:10.1039/d2ob02145e), 2023-01-01
Supplement: d2ob02145e1.pdf [file d2ob02145e1.pdf]

## Electronic Supplementary Information (ESI)

### **New Transient Directing Group: *Diethoxyethyl-L-Proline* Facilitate *ortho*-Arylation at Aryl-Amines/-Amino acids via Pd-Catalyzed C(sp<sup>2</sup>)-H Activation**

Subhashree S. Panda,<sup>a,b</sup> and Nagendra K. Sharma<sup>\*a,b</sup>

<sup>a</sup> School of Chemical Sciences, National Institute of Science Education and Research

(NISER), Jatani-752050, Odisha, India.

<sup>b</sup> Homi Bhabha National Institute (HBNI)-Mumbai, Anushaktinagar, Mumbai, 400 094

India

\*Corresponding author. Tel.: 0674-249-4141; fax: +91 (674) 2494004; Email:

[nagendra@niser.ac.in](mailto:nagendra@niser.ac.in)

#### Contents

|                                                               |     |
|---------------------------------------------------------------|-----|
| 1. Optimization of Reaction Conditions .....                  | S2  |
| 2. ESI-HRMS and NMR Characterization.....                     | S3  |
| 3. <sup>1</sup> H, NMR Spectra of compound Mosher Amides..... | S73 |
| 4. Crude NMR analysis of imine formation.....                 | S80 |

## 1. Optimization of Reaction Conditions

| <b>Table S1. Solvent Optimization of mono-o-arylation of amine in different solvent</b>                                                                                                                                                       |             |                                    |          |             |                 |
|-----------------------------------------------------------------------------------------------------------------------------------------------------------------------------------------------------------------------------------------------|-------------|------------------------------------|----------|-------------|-----------------|
|                                                                                                                                                                                                                                               |             |                                    |          |             |                 |
|                                                                                                                                                                                                                                               | <b>1(a)</b> |                                    |          | <b>2(a)</b> |                 |
| Entry                                                                                                                                                                                                                                         | Solvent     | Ag Salt                            | Time (h) | Temp.       | Yield (%) (m:d) |
| 1.                                                                                                                                                                                                                                            | HFIP        | AgTFA                              | 20       | 90          | 71:9            |
| 2.                                                                                                                                                                                                                                            | 1,2-DCE     | AgTFA                              | 20       | 90          | trace           |
| 3.                                                                                                                                                                                                                                            | AcOH        | AgTFA                              | 20       | 90          | 37              |
| 4.                                                                                                                                                                                                                                            | DMF         | AgTFA                              | 20       | 90          | n.d             |
| 5.                                                                                                                                                                                                                                            | ACN         | AgTFA                              | 20       | 90          | n.d             |
| 6.                                                                                                                                                                                                                                            | DMA         | AgTFA                              | 20       | 90          | n.d             |
| 7.                                                                                                                                                                                                                                            | TFE         | AgTFA                              | 20       | 90          | 51              |
| 8.                                                                                                                                                                                                                                            | t-Butanol   | AgTFA                              | 20       | 90          | n.d             |
| 9.                                                                                                                                                                                                                                            | THF         | AgTFA                              | 20       | 90          | n.d             |
| 10.                                                                                                                                                                                                                                           | 1,4-Dioxane | AgTFA                              | 20       | 90          | n.d             |
| 11.                                                                                                                                                                                                                                           | Isopropanol | AgTFA                              | 20       | 90          | n.d             |
| 12.                                                                                                                                                                                                                                           | HFIP        | AgSbF <sub>6</sub>                 | 20       | 90          | 7               |
| 13.                                                                                                                                                                                                                                           | HFIP        | CF <sub>3</sub> SO <sub>3</sub> Ag | 20       | 90          | 13              |
| 14.                                                                                                                                                                                                                                           | HFIP        | AgPF <sub>6</sub>                  | 20       | 90          | trace           |
| Reaction Conditions: - (i) 1a (1.0 eq.), 4-Iodobenzene (2.0 eq.), Pd (OAc) <sub>2</sub> (10 mol%), Ag Salt (2.0 eq.), TDG1 (20 mol%), HFIP (1ml.), 90 °C, 20 h (ii) (Boc) <sub>2</sub> O (1.1 eq.), Et <sub>3</sub> N (3 eq.), DCM, rt, 1.5h. |             |                                    |          |             |                 |

## 2. ESI-HRMS and NMR Characterization.

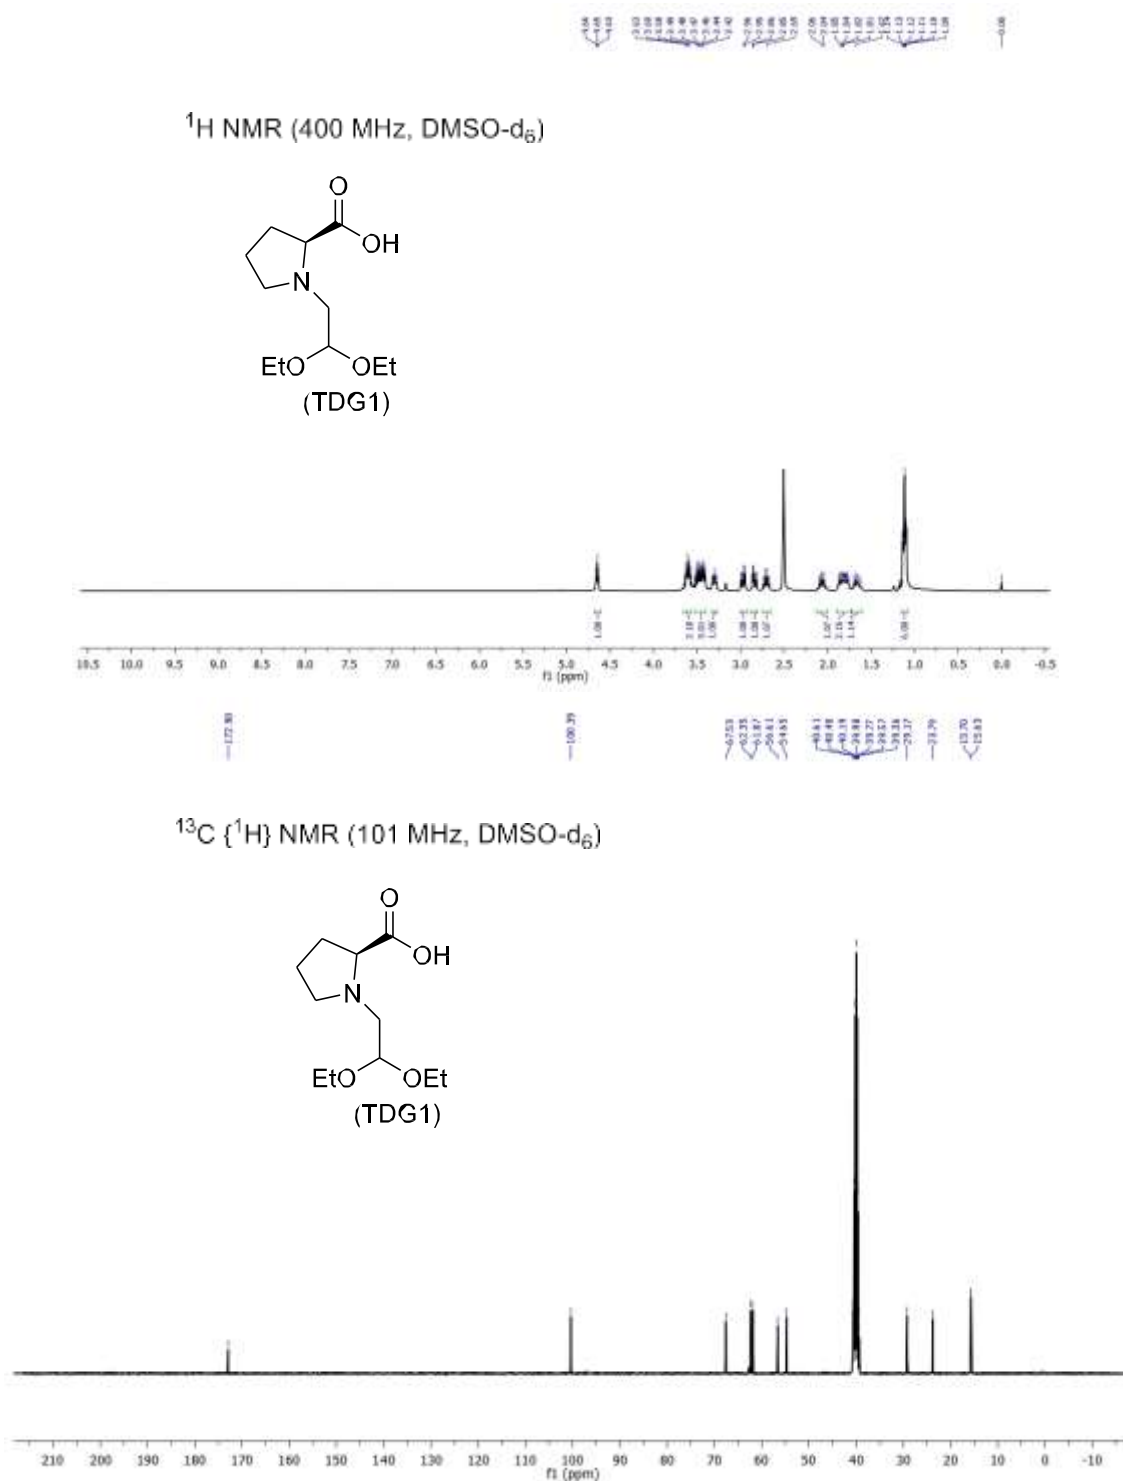

**Fig. S1** <sup>1</sup>H, <sup>13</sup>C {<sup>1</sup>H} NMR Spectra of TDG1.

XEVO-G2XSQTOF#YFA1739

NKS\_28062022\_23 (0.053) Cu (0.05); Is (1.00,1.00) C<sub>11</sub>H<sub>21</sub>NO<sub>4</sub>Na

1: TOF MS ES+  
8.74e12

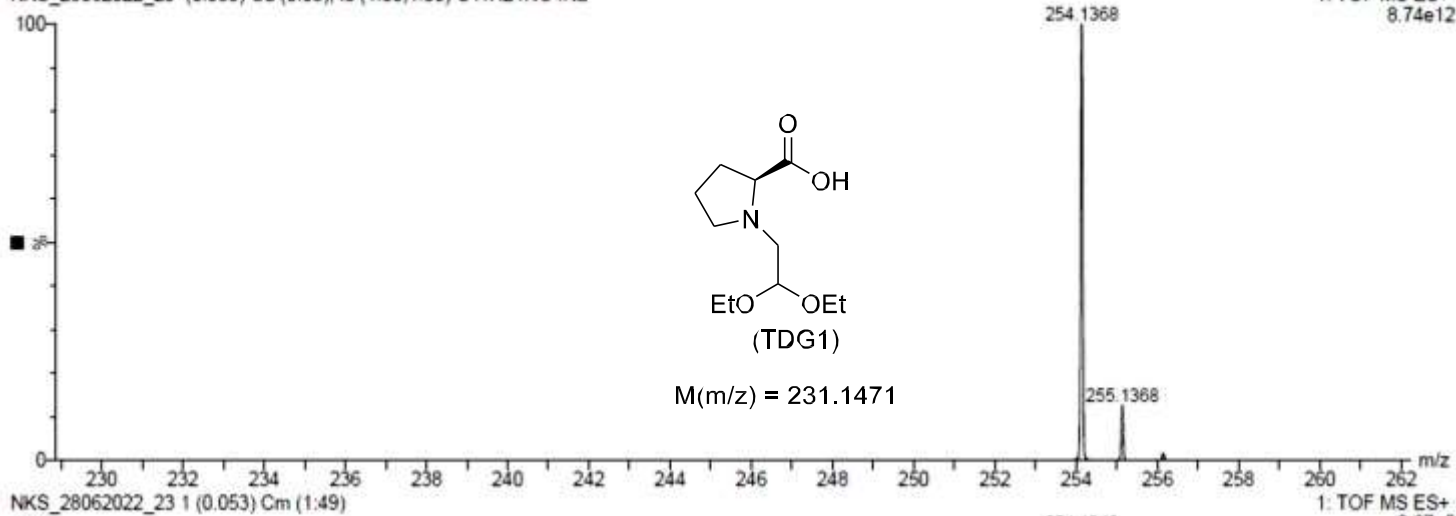

NKS\_28062022\_23 1 (0.053) Cm (1.49)

1: TOF MS ES+  
2.67e5

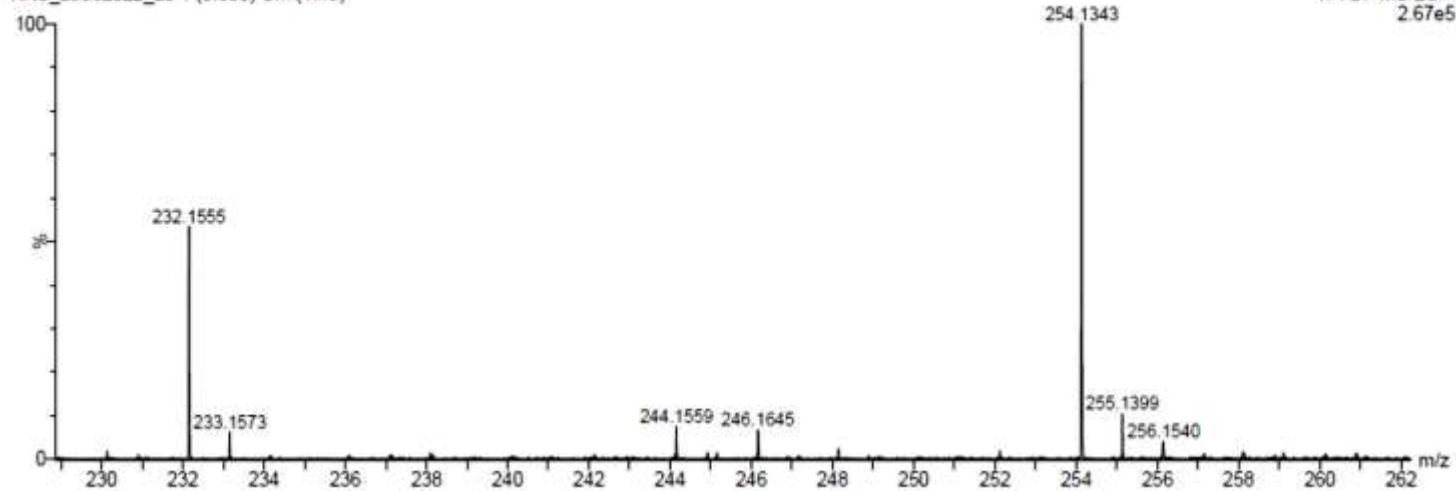

Fig. Fig. S2 ESI-HRMS Spectra of TDG 1.

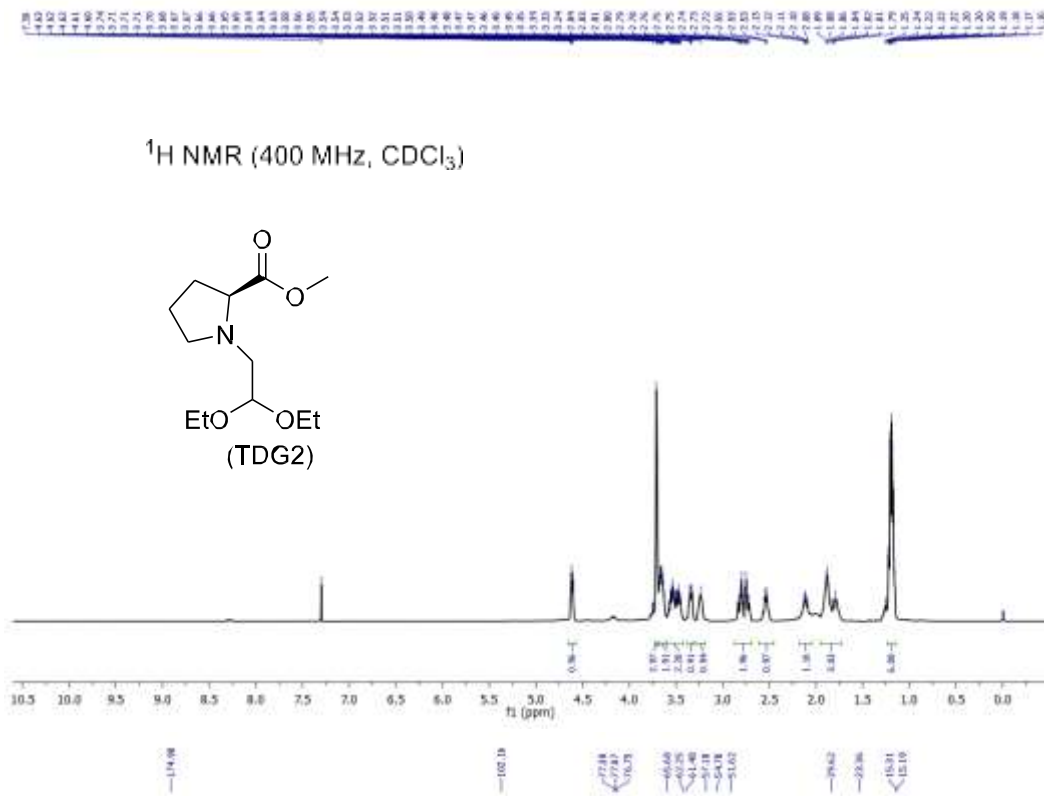

<sup>13</sup>C {<sup>1</sup>H} NMR (101MHz, CDCl<sub>3</sub>)

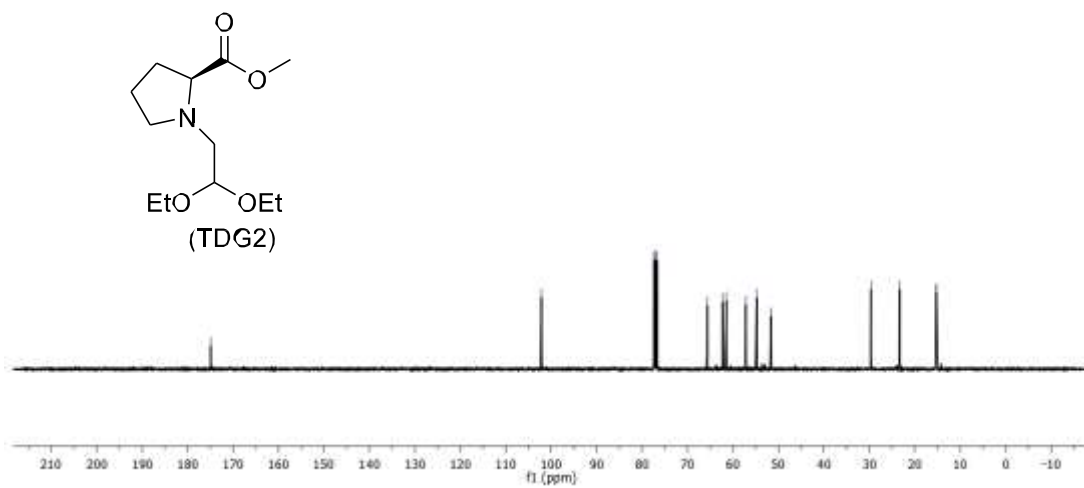

Fig. S3 <sup>1</sup>H, <sup>13</sup>C {<sup>1</sup>H} NMR Spectra of TDG2.

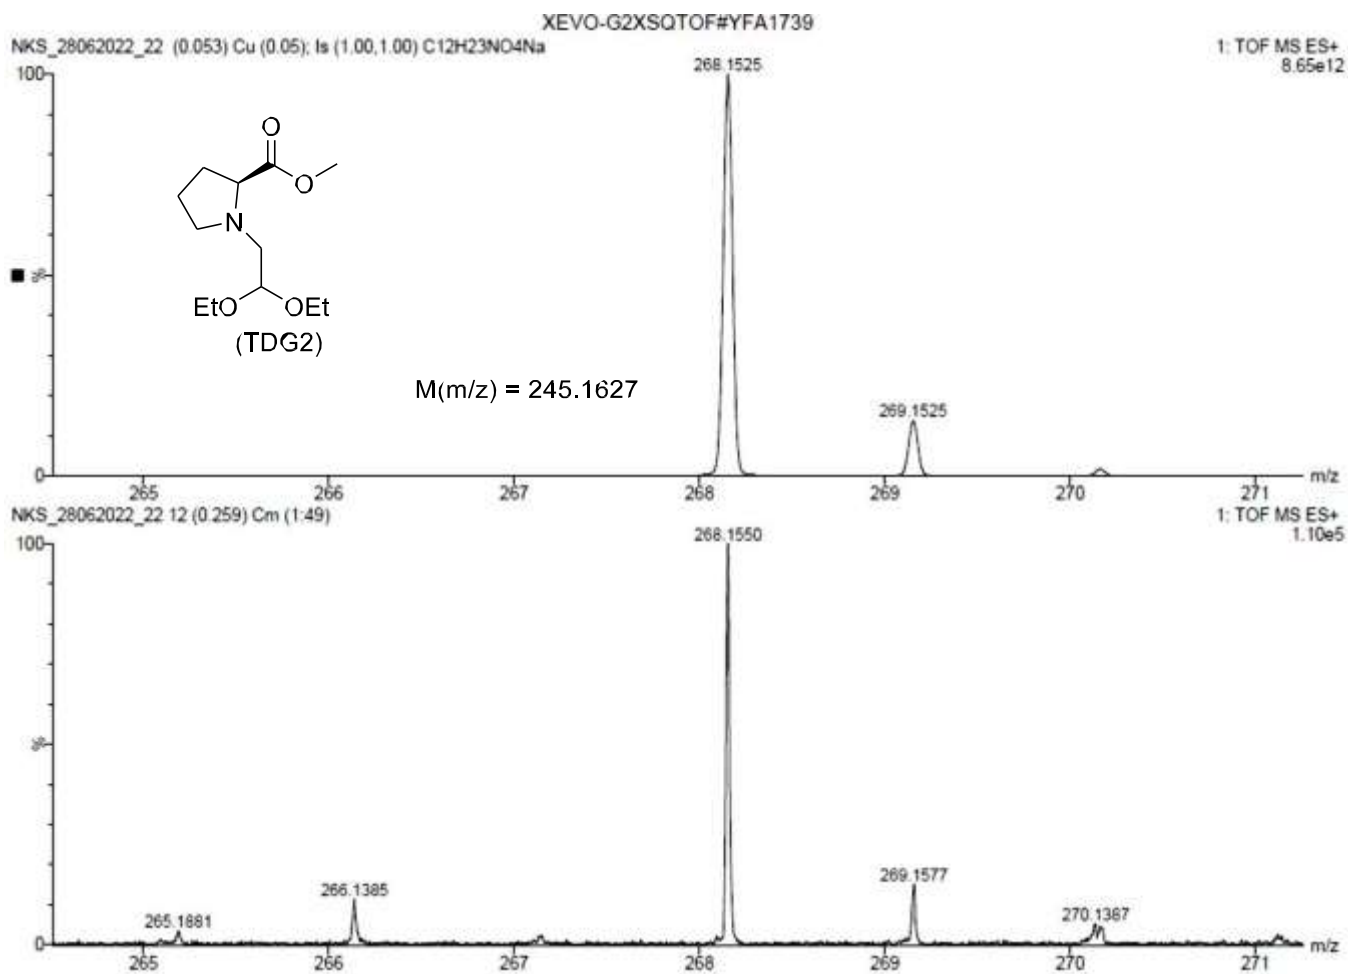

Fig. S4 ESI-HRMS Spectra of TDG2.

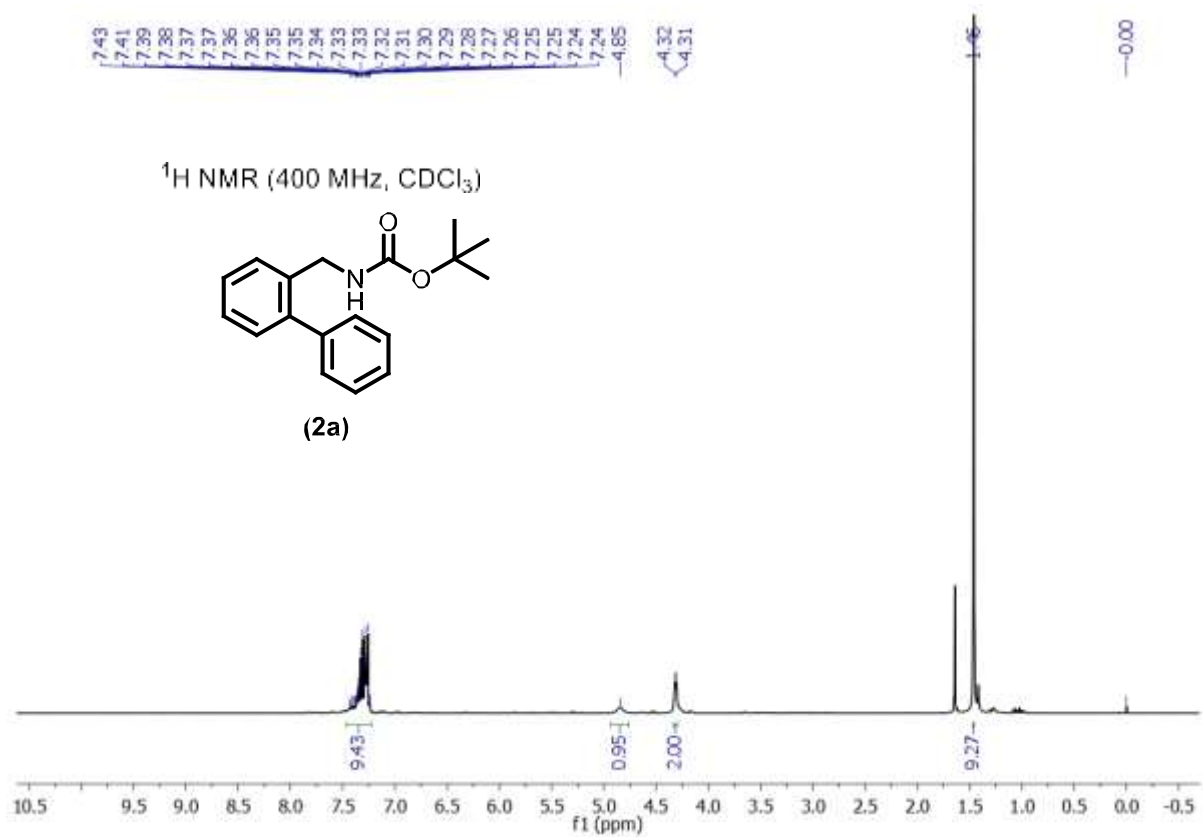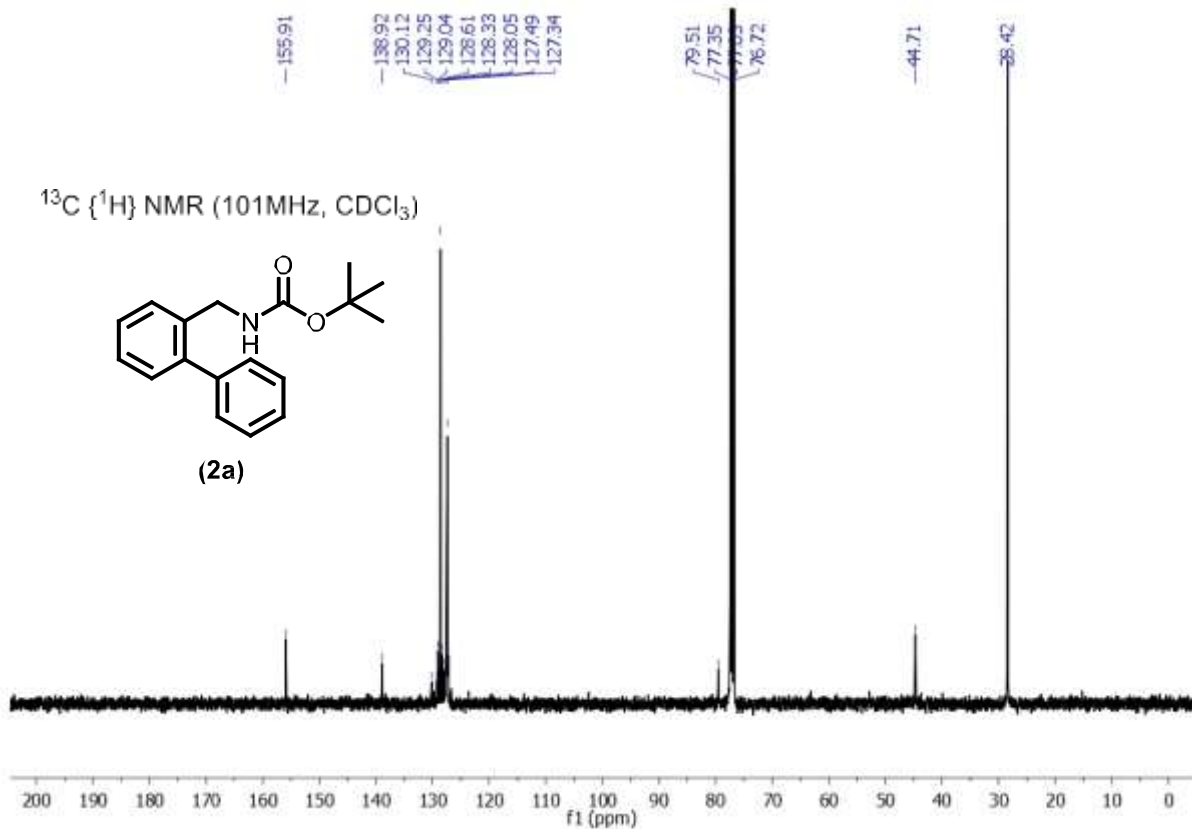

Fig. S5 <sup>1</sup>H, <sup>13</sup>C {<sup>1</sup>H} NMR Spectra of compound 2a.

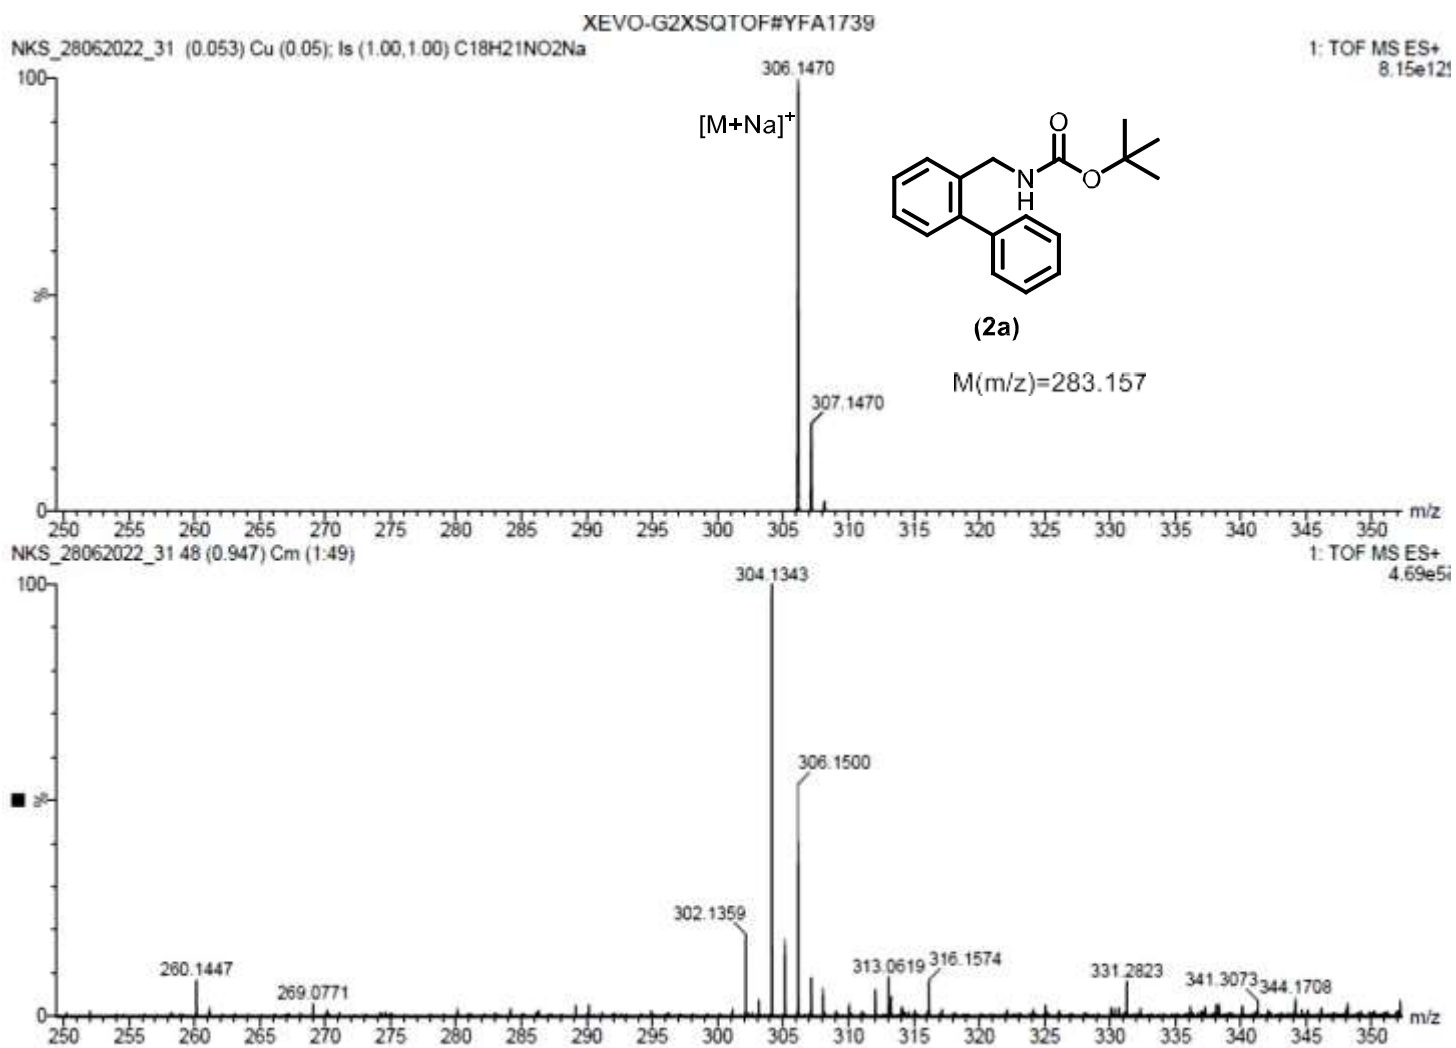

Fig. S6 ESI-HRMS Spectra of compound 2a.



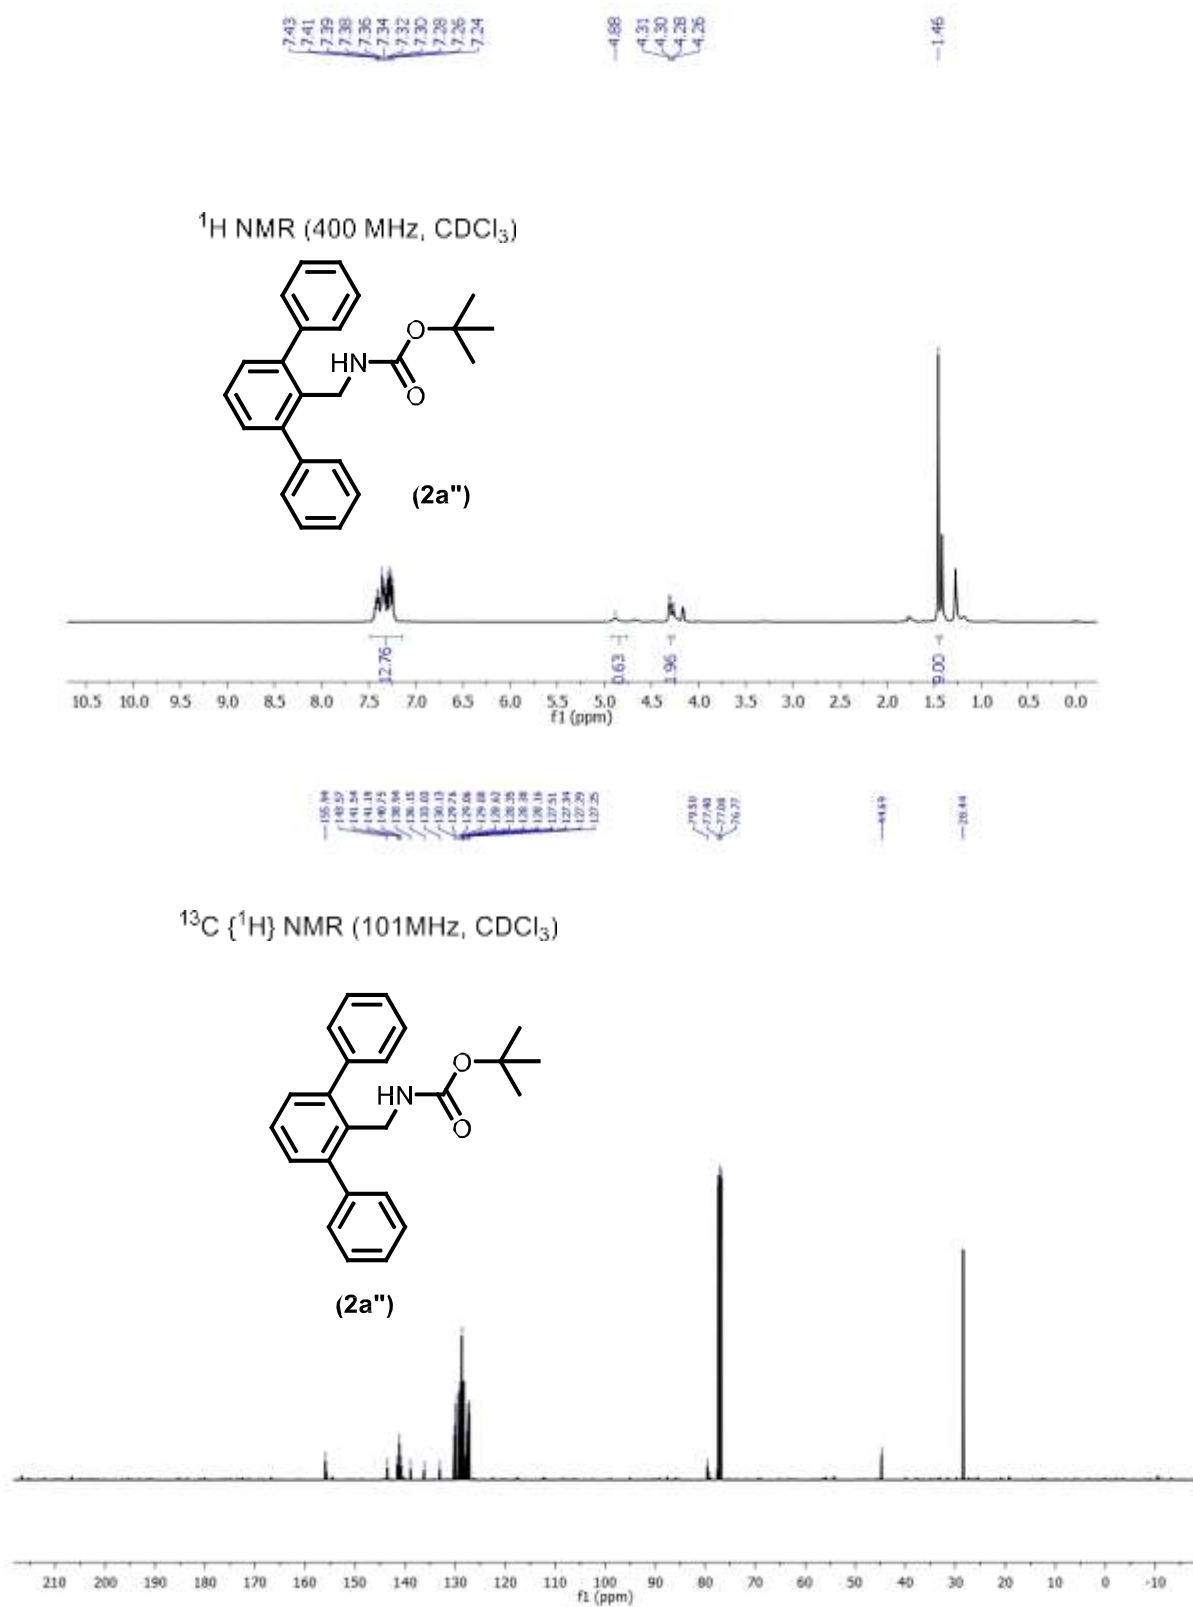

**Fig. S7** <sup>1</sup>H, <sup>13</sup>C {<sup>1</sup>H} NMR Spectra of compound **2a''**

## Display Report

### Analysis Info

Analysis Name D:\Data\APR-2022\NKS\23042022\_NKS\_SSDP-316.d  
Method Pos\_tune\_low\_05122019.m  
Sample Name Tmix-131118  
Comment

Acquisition Date 4/23/2022 8:56:42 PM

Operator PRAKASH BEHERA  
Instrument micrOTOF-Q II 10337

### Acquisition Parameter

|             |            |                       |           |                  |           |
|-------------|------------|-----------------------|-----------|------------------|-----------|
| Source Type | ESI        | Ion Polarity          | Positive  | Set Nebulizer    | 0.5 Bar   |
| Focus       | Not active | Set Capillary         | 4500 V    | Set Dry Heater   | 180 °C    |
| Scan Begin  | 50 m/z     | Set End Plate Offset  | -500 V    | Set Dry Gas      | 4.0 l/min |
| Scan End    | 3000 m/z   | Set Collision Cell RF | 130.0 Vpp | Set Divert Valve | Waste     |

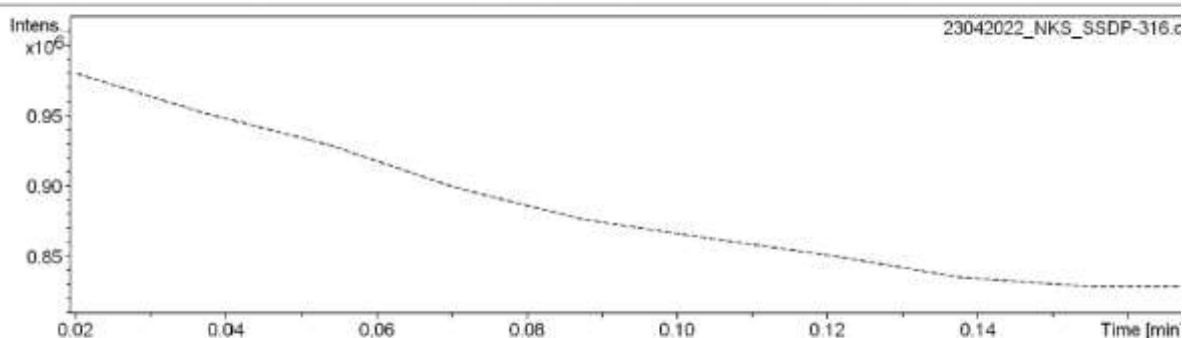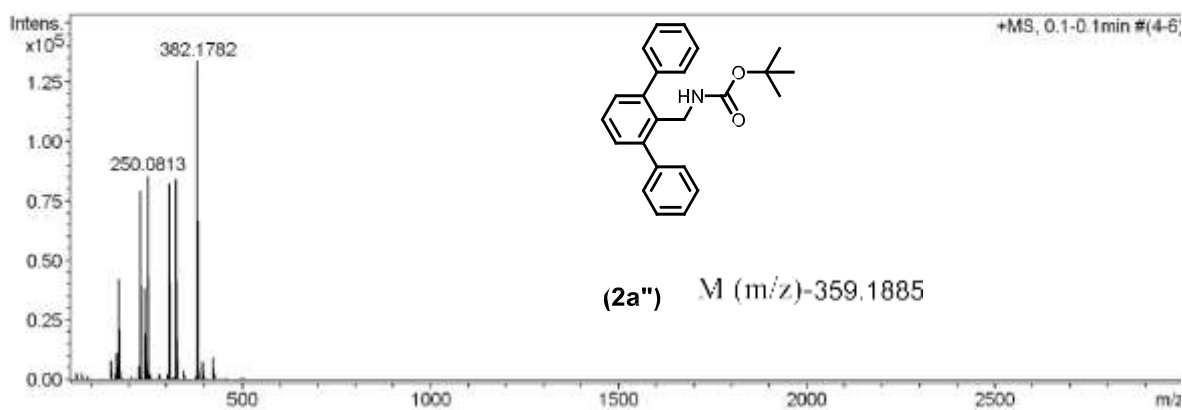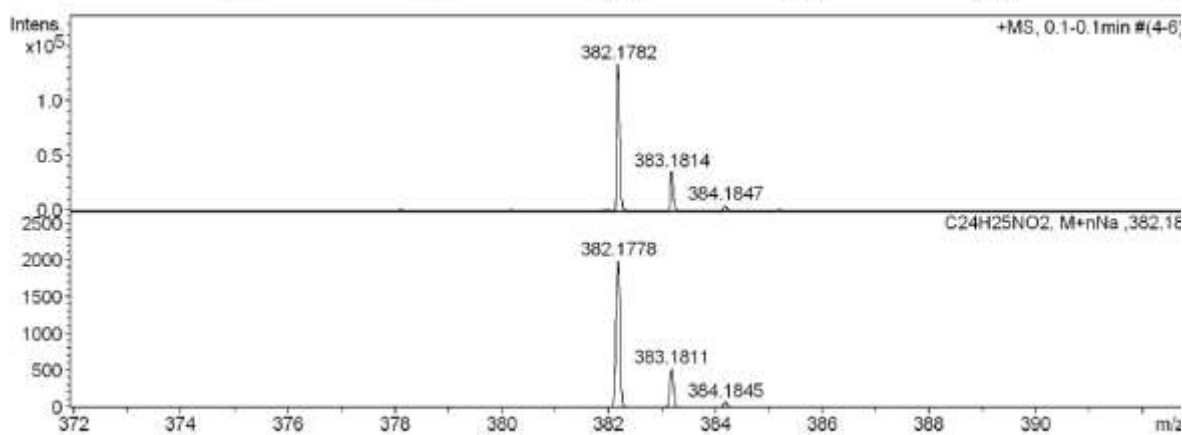

Fig. S8 ESI-HRMS Spectra of compound 2a''

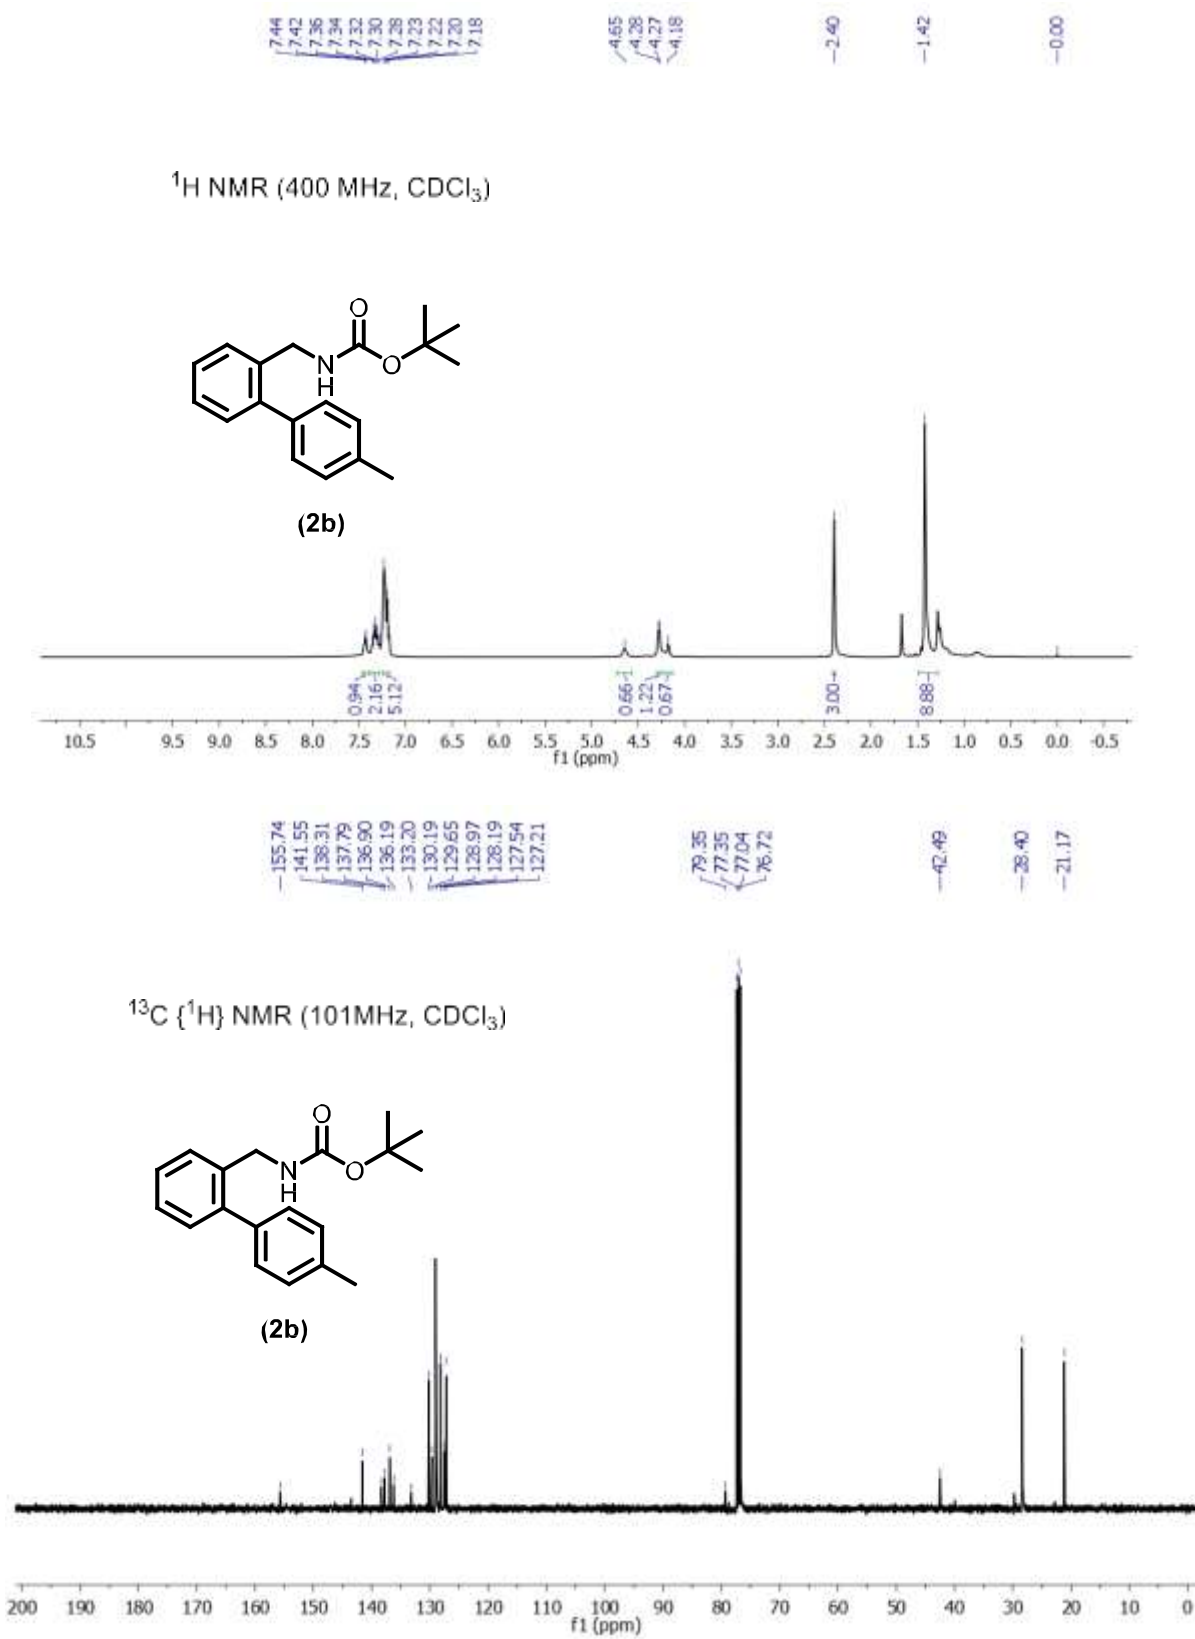

**Fig. S9** <sup>1</sup>H, <sup>13</sup>C {<sup>1</sup>H} NMR Spectra of compound **2b**.

XEVO-G2XSQTOF#YFA1739

NKS\_28062022\_7 (0.053) Cu (0.05); Is (1.00,1.00) C<sub>19</sub>H<sub>24</sub>NO<sub>2</sub>

1: TOF MS ES+  
8.06e12

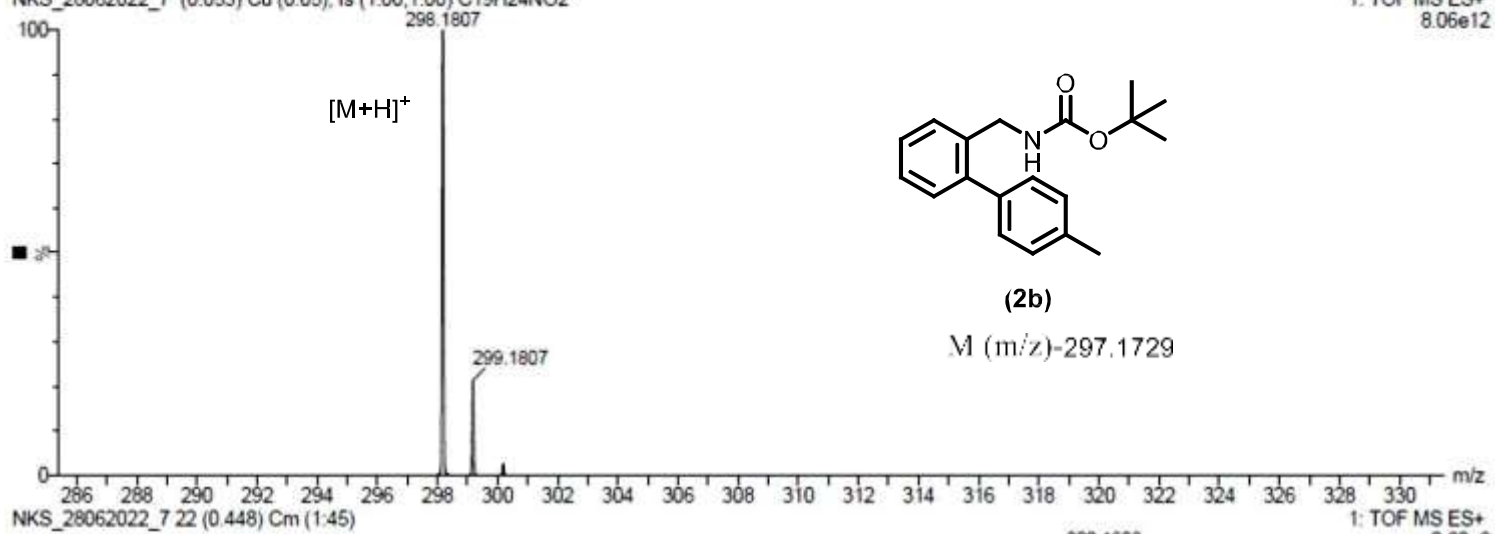

NKS\_28062022\_7 22 (0.448) Cm (1.45)

1: TOF MS ES+  
2.63e6

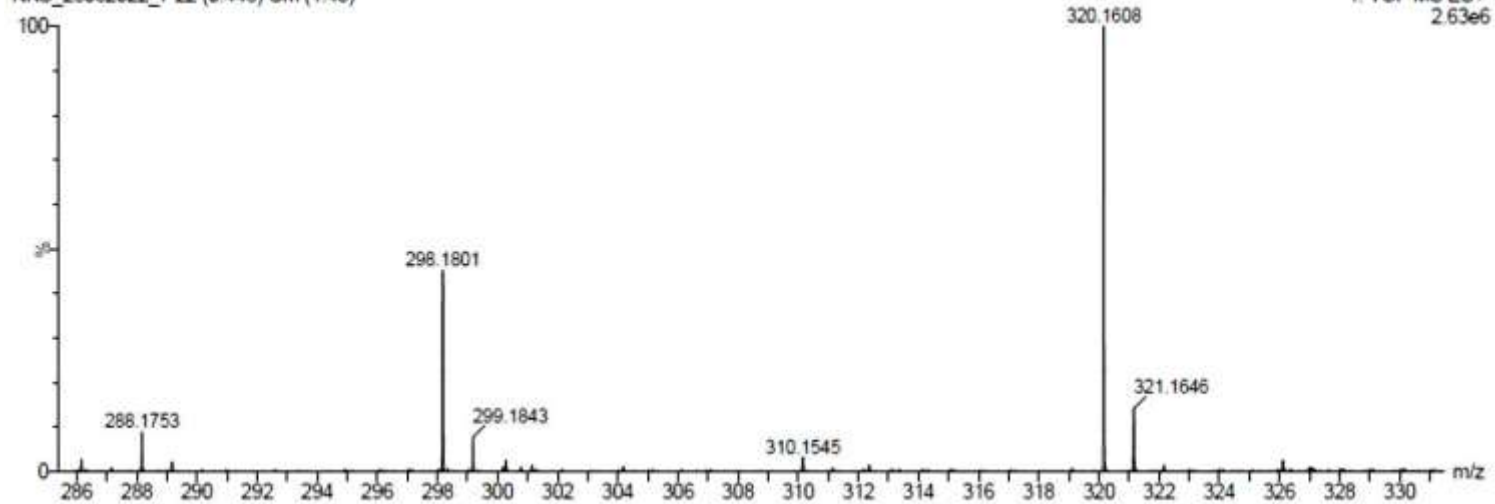

Fig. S10 ESI-HRMS Spectra of compound **2b**.

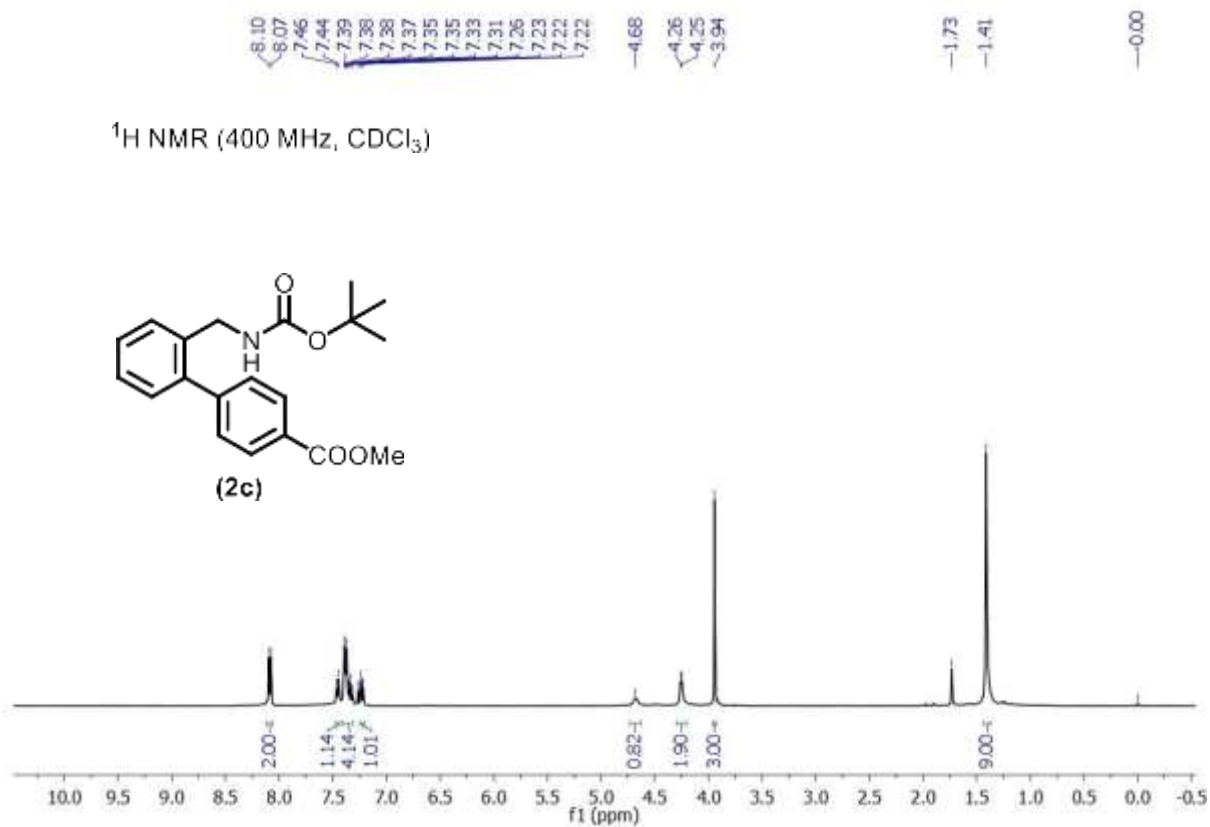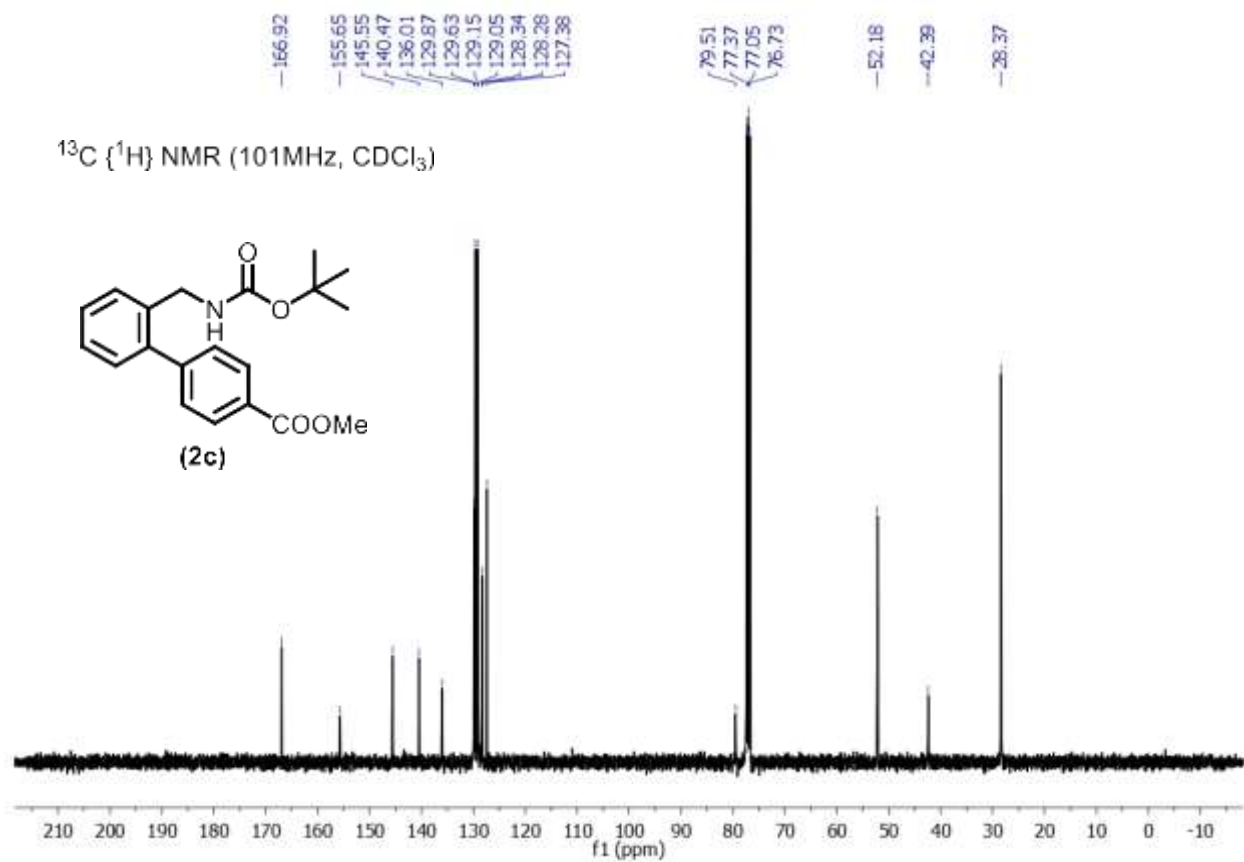

**Fig. S11** <sup>1</sup>H, <sup>13</sup>C {<sup>1</sup>H} NMR Spectra of compound **2c**.

## Display Report

### Analysis Info

Analysis Name D:\Data\MAY-2022\NKS\10052022\_NKS-SSDP-362 S1.d  
Method Pos\_tune\_low\_21042022.m  
Sample Name Tmix-131118  
Comment

Acquisition Date 5/10/2022 7:27:02 PM

Operator Amit S.Sahu  
Instrument micrOTOF-Q II 10337

### Acquisition Parameter

|             |            |                       |           |                  |           |
|-------------|------------|-----------------------|-----------|------------------|-----------|
| Source Type | ESI        | Ion Polarity          | Positive  | Set Nebulizer    | 0.5 Bar   |
| Focus       | Not active | Set Capillary         | 4500 V    | Set Dry Heater   | 180 °C    |
| Scan Begin  | 50 m/z     | Set End Plate Offset  | -500 V    | Set Dry Gas      | 4.0 l/min |
| Scan End    | 3000 m/z   | Set Collision Cell RF | 130.0 Vpp | Set Divert Valve | Waste     |

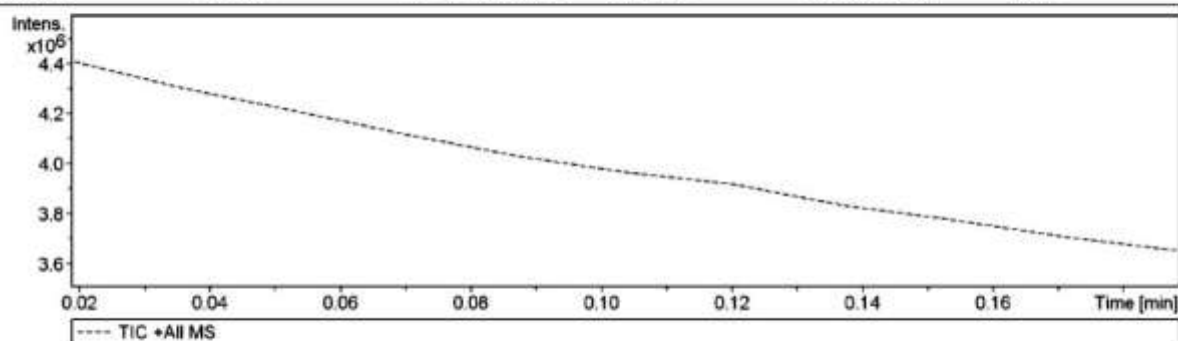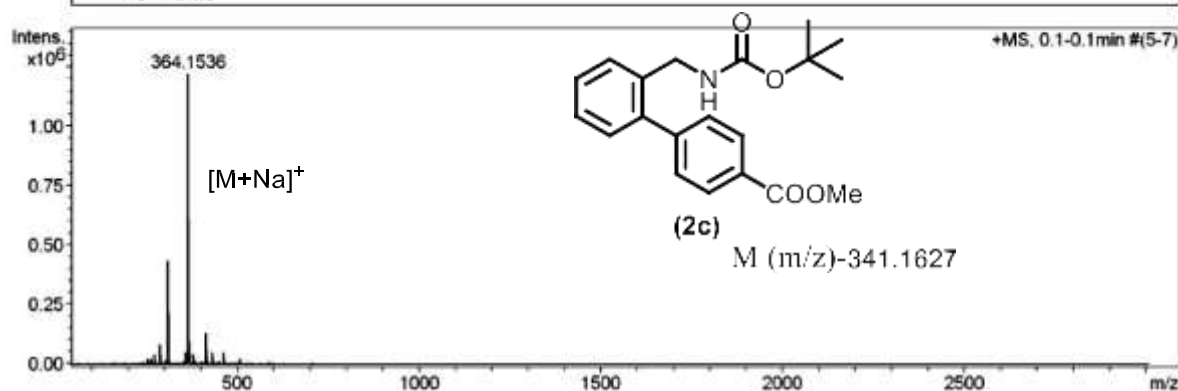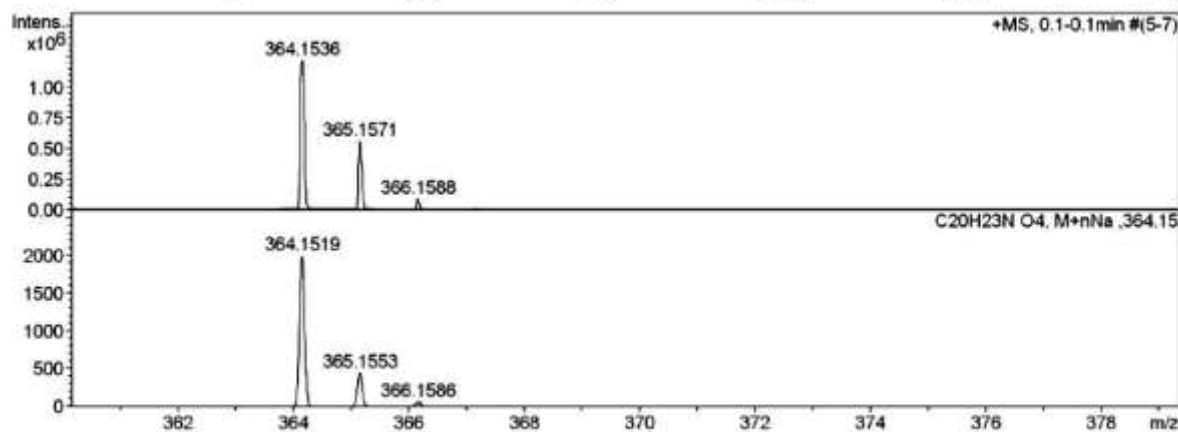

Fig. S12 ESI-HRMS Spectra of compound 2c.

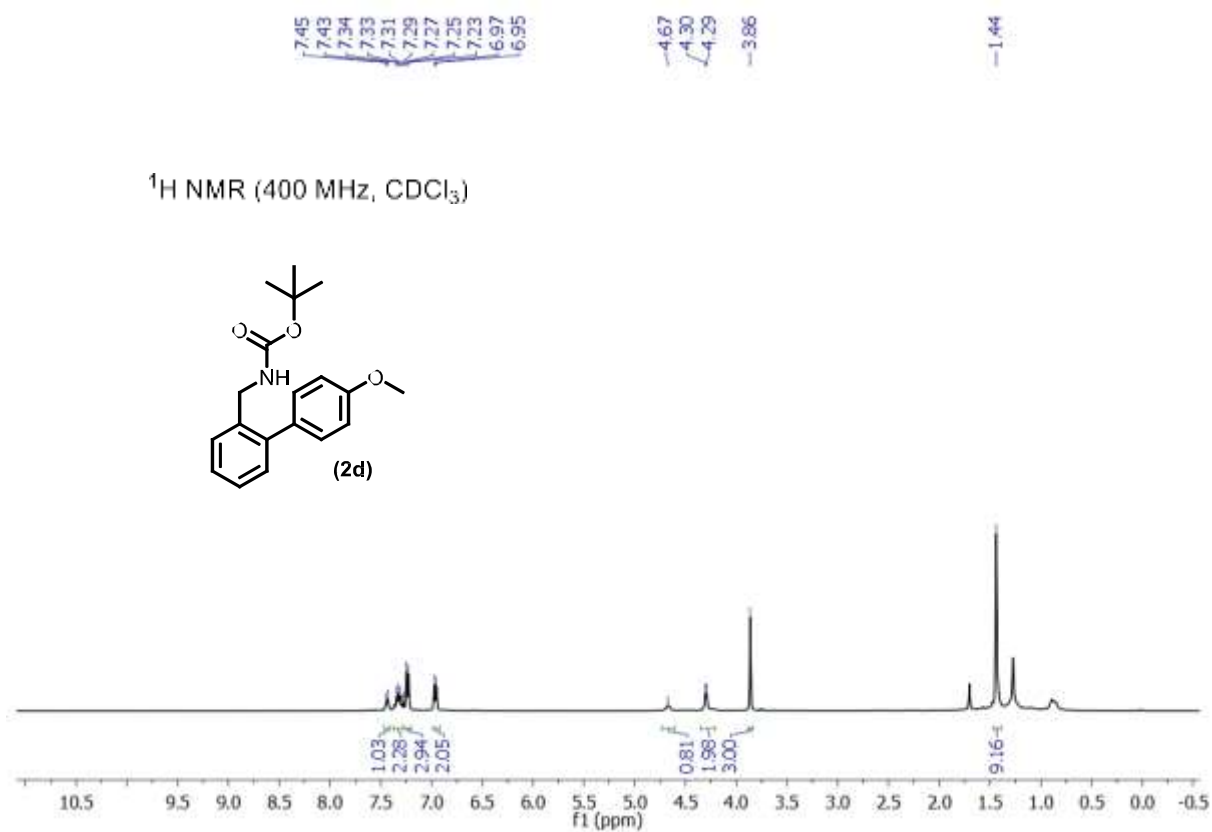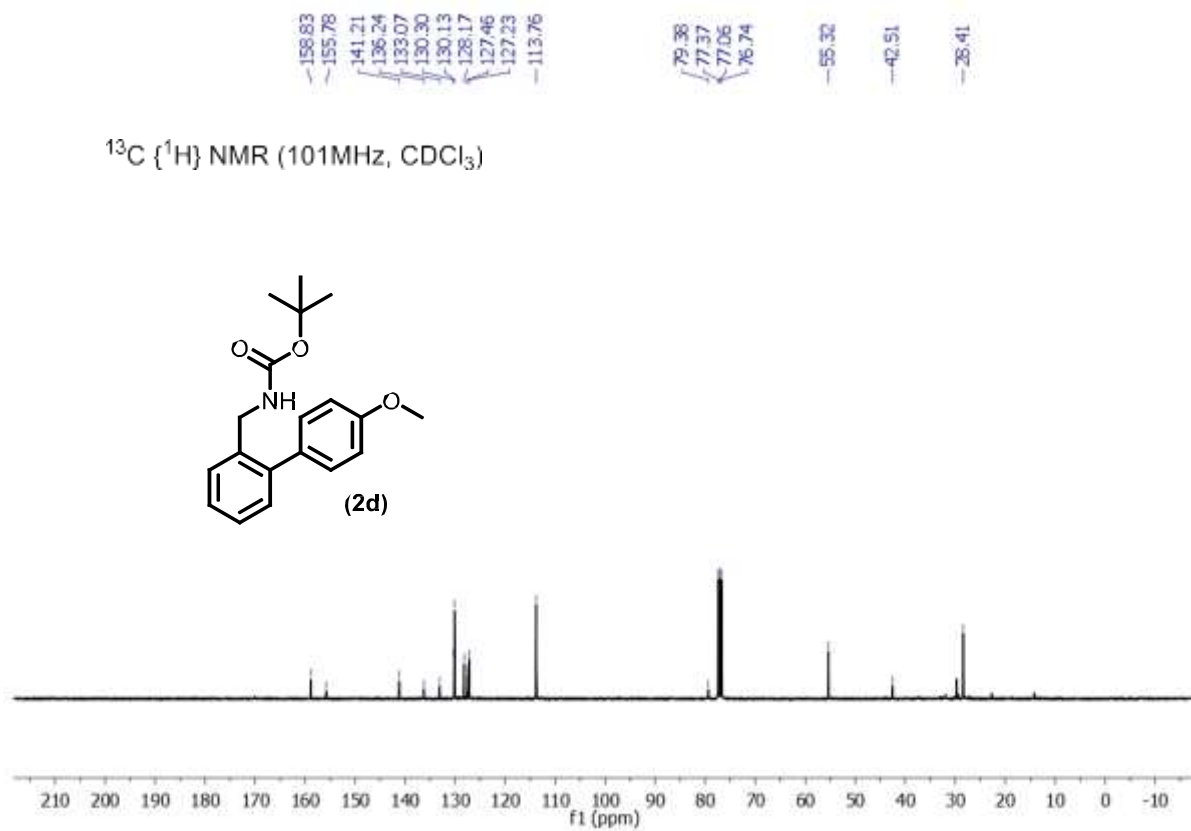

**Fig. S13** <sup>1</sup>H, <sup>13</sup>C {<sup>1</sup>H} NMR Spectra of compound **2d**.

## Display Report

### Analysis Info

Analysis Name D:\Data\MAY-2022\NKS\15052022\_NKS\_SSDP-332 S1.d  
Method Pos\_tune\_low\_21042022.m  
Sample Name Tmix-131118  
Comment

Acquisition Date 5/16/2022 12:30:20 AM

Operator Amit S.Sahu  
Instrument microTOF-Q II 10337

### Acquisition Parameter

|             |            |                       |           |                  |           |
|-------------|------------|-----------------------|-----------|------------------|-----------|
| Source Type | ESI        | Ion Polarity          | Positive  | Set Nebulizer    | 0.5 Bar   |
| Focus       | Not active | Set Capillary         | 4500 V    | Set Dry Heater   | 180 °C    |
| Scan Begin  | 50 m/z     | Set End Plate Offset  | -500 V    | Set Dry Gas      | 4.0 l/min |
| Scan End    | 3000 m/z   | Set Collision Cell RF | 130.0 Vpp | Set Divert Valve | Waste     |

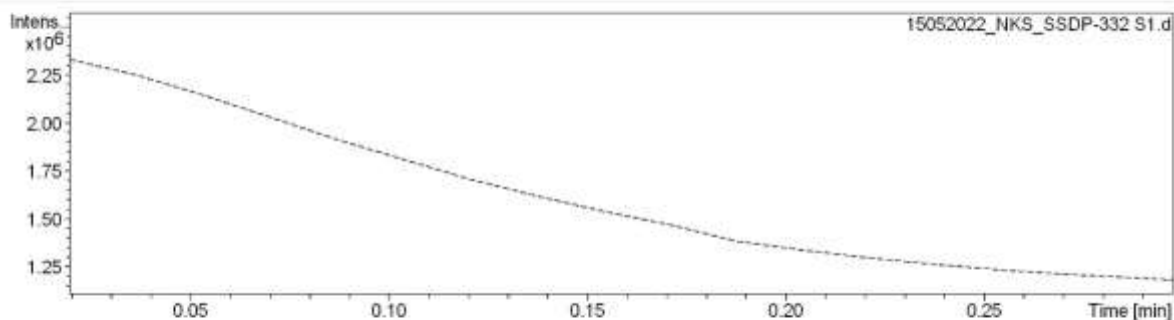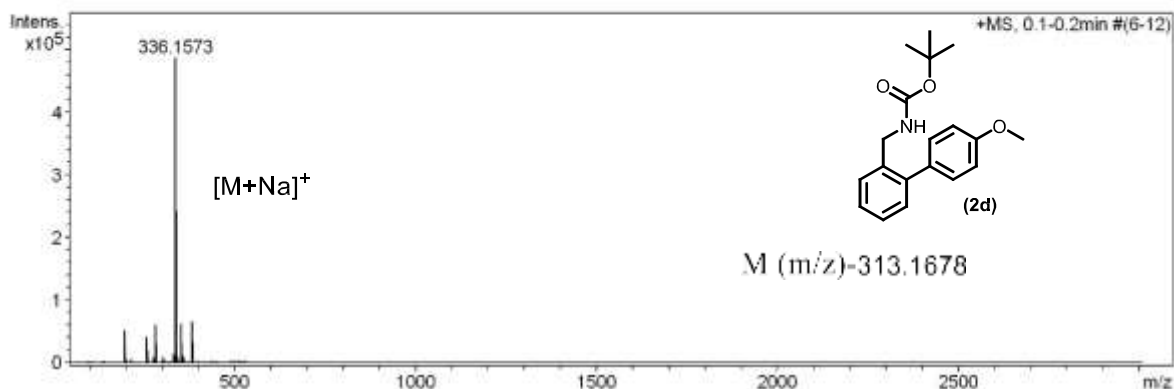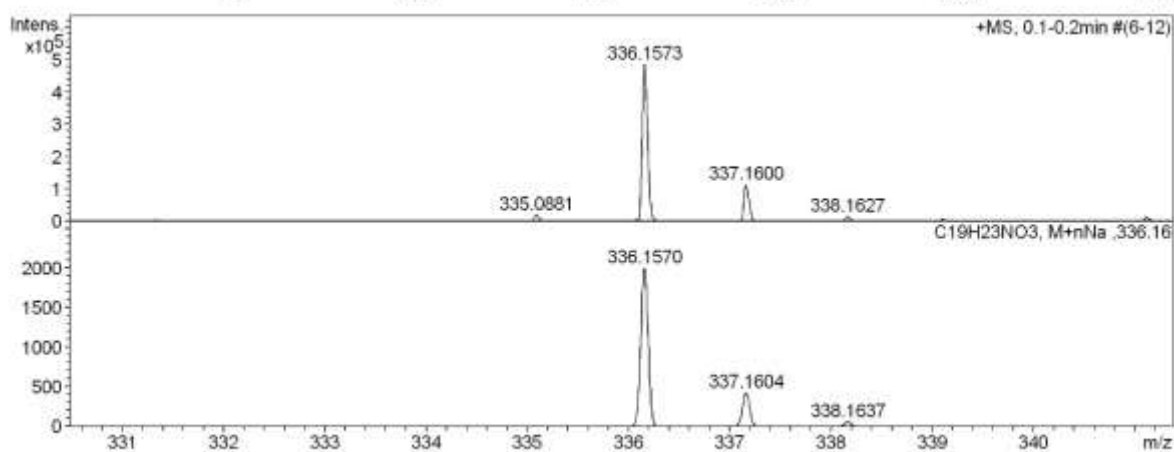

**Fig. S14 ESI-HRMS Spectra of compound 2d.**



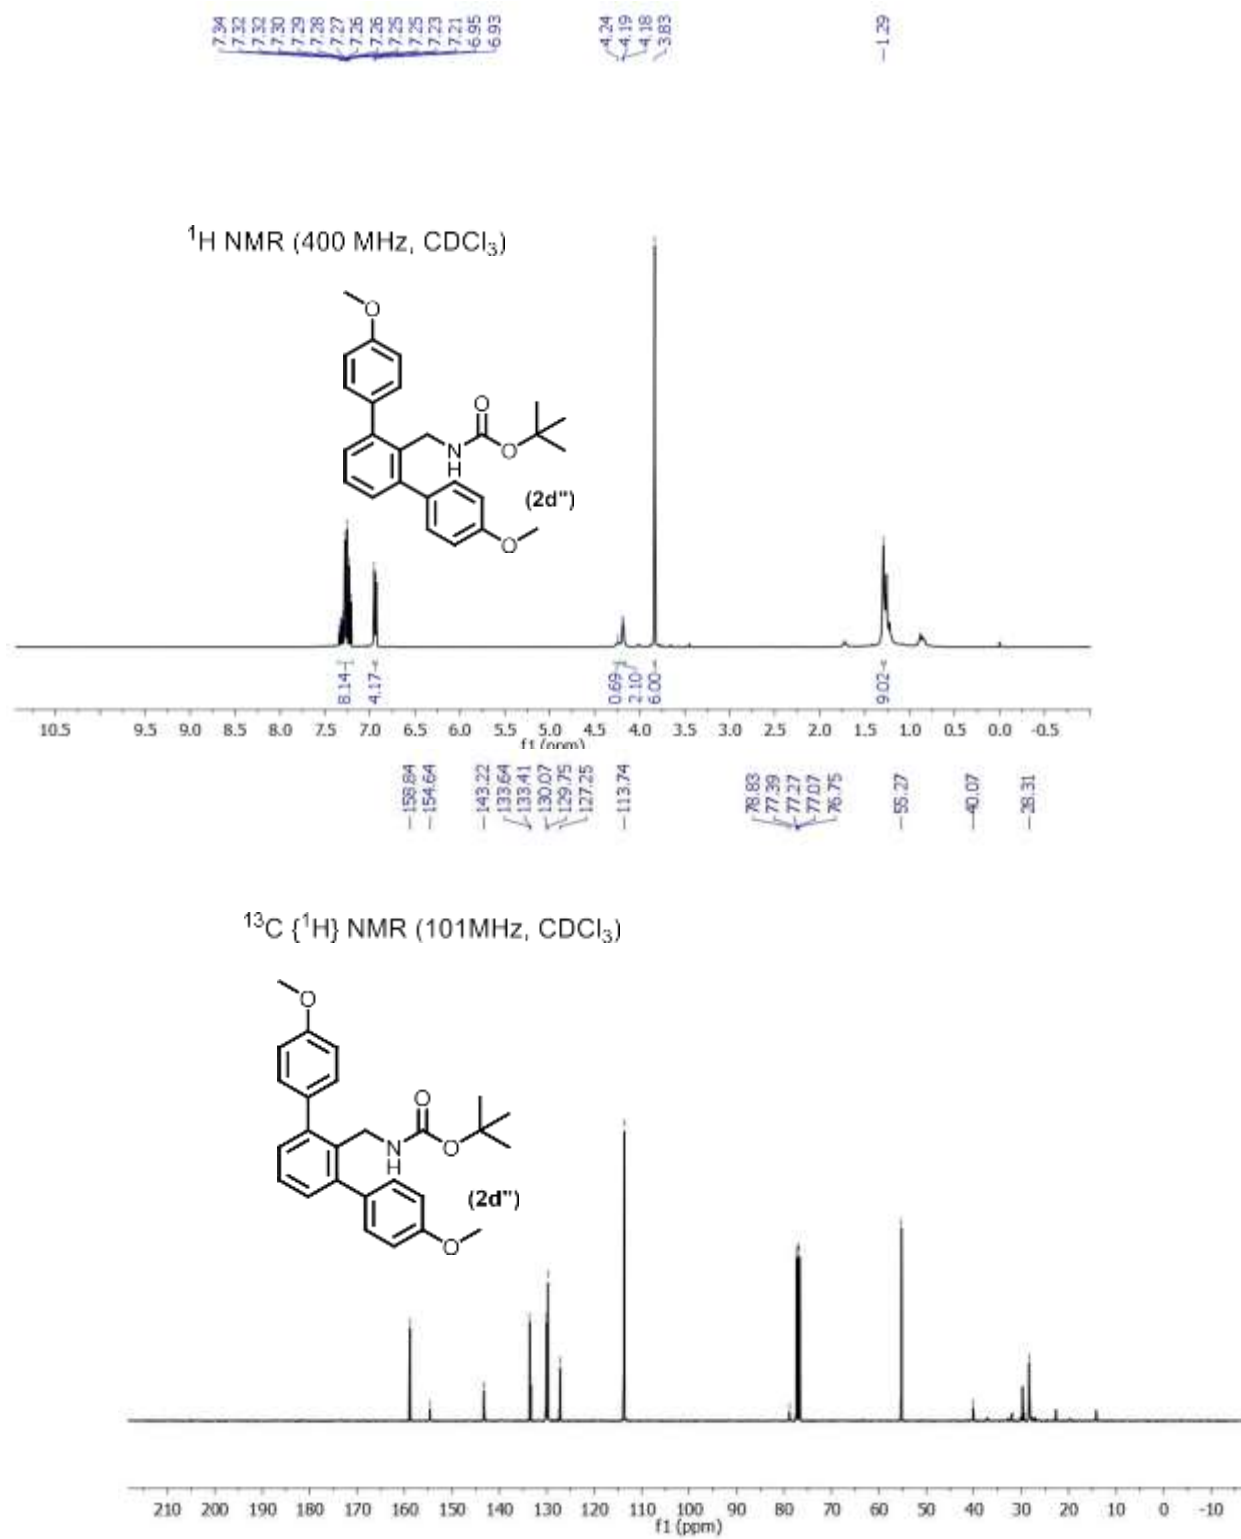

**Fig. S15** <sup>1</sup>H, <sup>13</sup>C {<sup>1</sup>H} NMR Spectra of compound **2d''**.

## Display Report

### Analysis Info

Analysis Name D:\Data\MAY-2022\NKS\15052022\_NKS\_SSDP-332 S2.d  
Method Pos\_tune\_low\_21042022.m  
Sample Name Tmix-131118  
Comment

Acquisition Date 5/15/2022 11:58:43 PM

Operator Amit S.Sahu  
Instrument micrOTOF-Q II 10337

### Acquisition Parameter

|             |            |                       |           |                  |           |
|-------------|------------|-----------------------|-----------|------------------|-----------|
| Source Type | ESI        | Ion Polarity          | Positive  | Set Nebulizer    | 0.5 Bar   |
| Focus       | Not active | Set Capillary         | 4500 V    | Set Dry Heater   | 180 °C    |
| Scan Begin  | 50 m/z     | Set End Plate Offset  | -500 V    | Set Dry Gas      | 4.0 l/min |
| Scan End    | 3000 m/z   | Set Collision Cell RF | 130.0 Vpp | Set Divert Valve | Waste     |

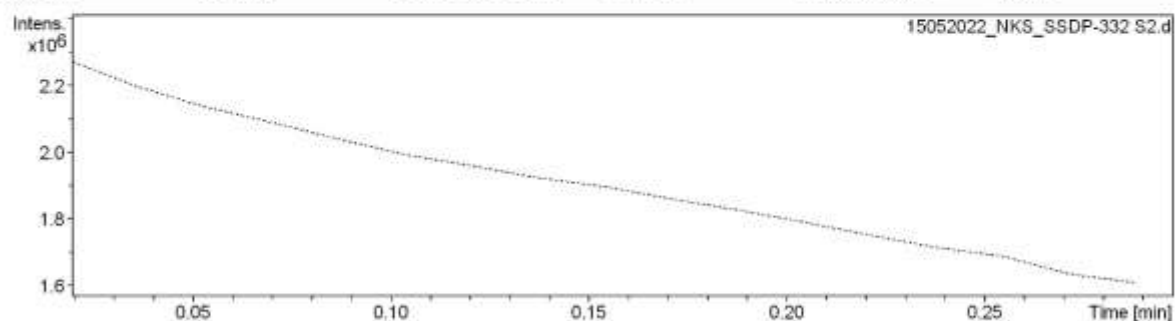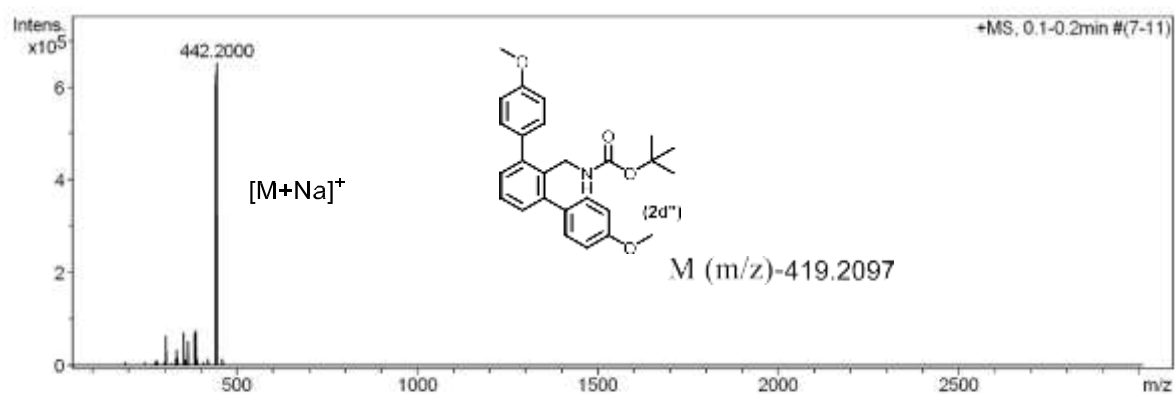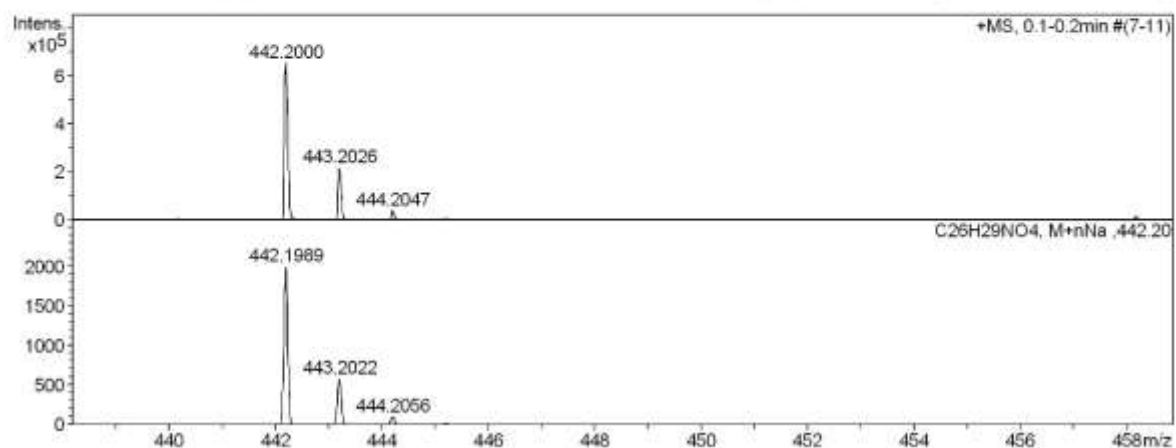

Fig. S16 ESI-HRMS Spectra of compound 2d".

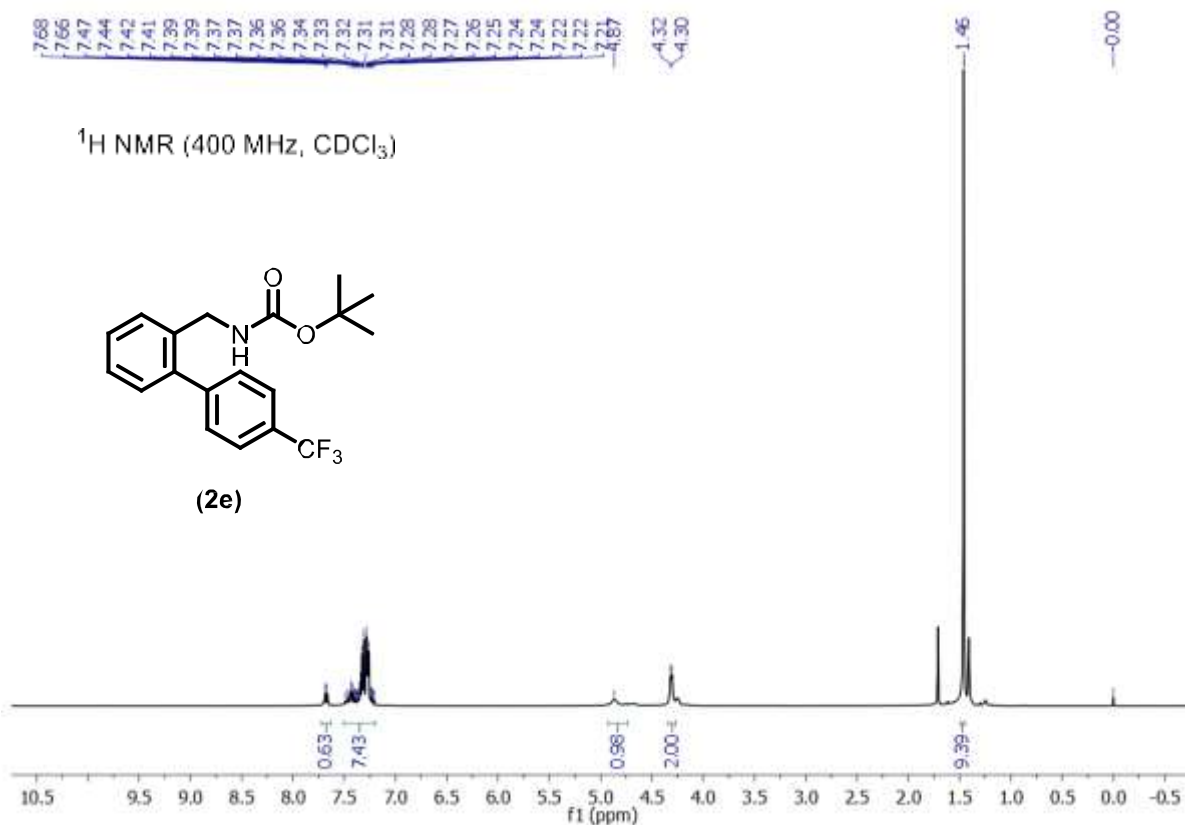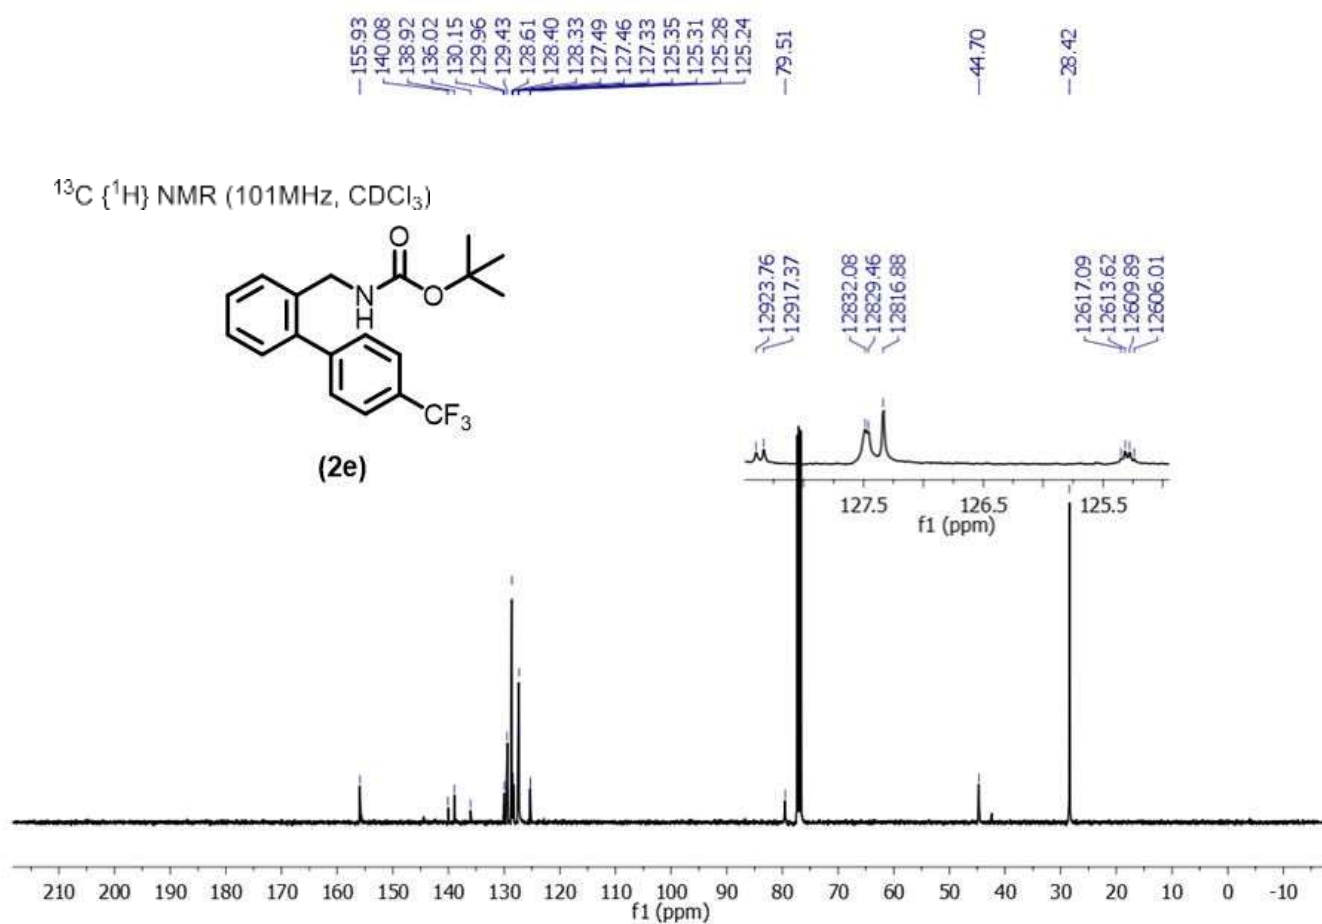

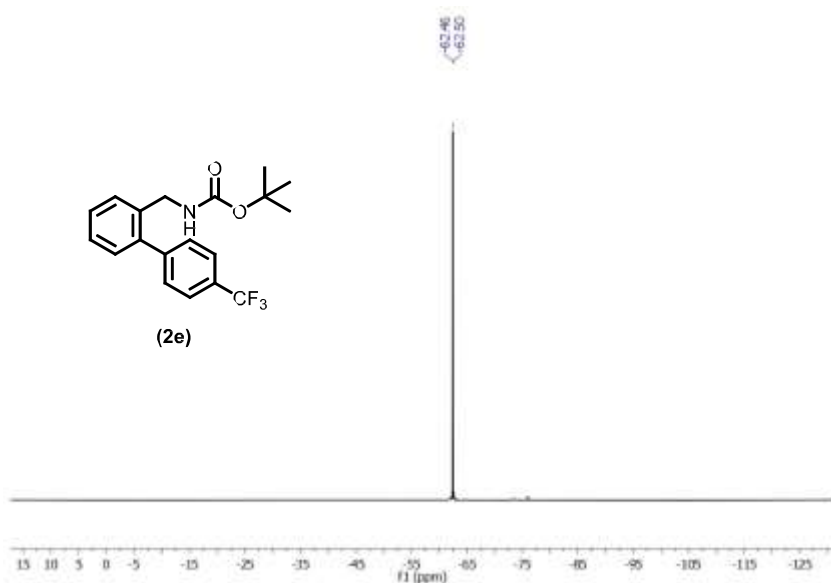

**Fig. S17**  $^1\text{H}$ ,  $^{13}\text{C}$  { $^1\text{H}$ },  $^{19}\text{F}$  NMR Spectra of compound **2e**.

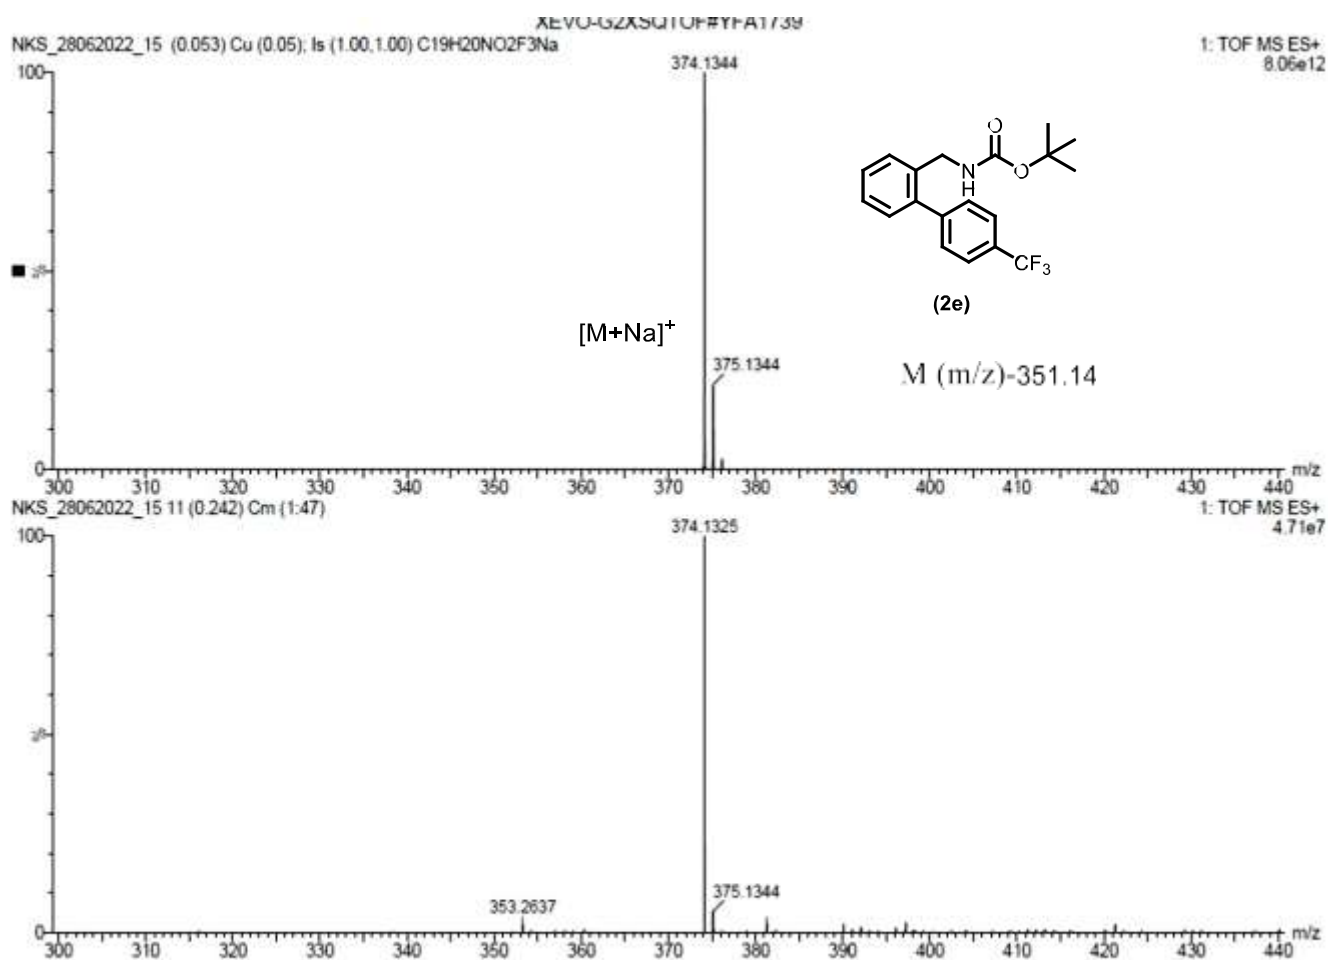

**Fig. S18** ESI-HRMS Spectra of compound **2e**.

7.37  
7.36  
7.36  
7.35  
7.34  
7.34  
7.33  
7.33  
7.31  
7.31  
7.30  
7.29  
7.27  
7.26  
7.25  
7.24  
7.23  
7.22  
7.22  
7.07  
7.07  
7.06  
7.06  
7.05  
7.05  
4.93  
4.30  
4.29  
4.25  
4.24

-1.45

<sup>1</sup>H NMR (400 MHz, CDCl<sub>3</sub>)

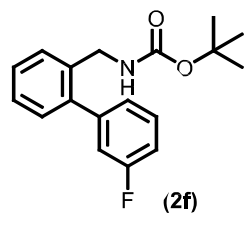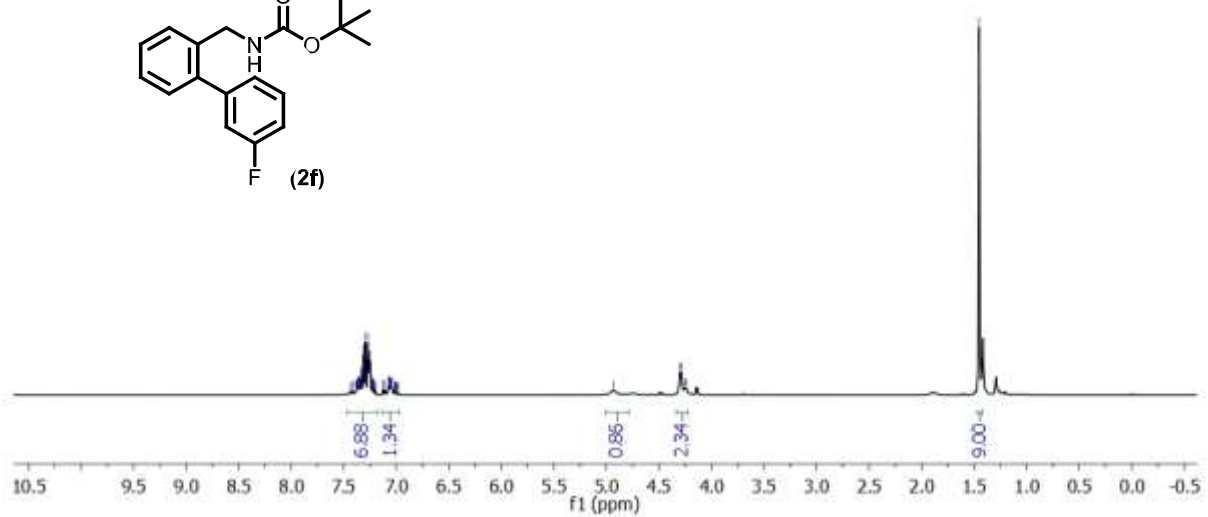

163.75  
161.36  
155.96  
138.97  
129.93  
129.80  
128.60  
128.24  
128.14  
127.48  
127.31  
124.88  
116.22  
116.01  
114.28  
79.47  
77.42  
77.10  
76.78  
44.68  
28.42  
28.22

<sup>13</sup>C {<sup>1</sup>H} NMR (101MHz, CDCl<sub>3</sub>)

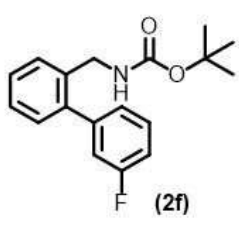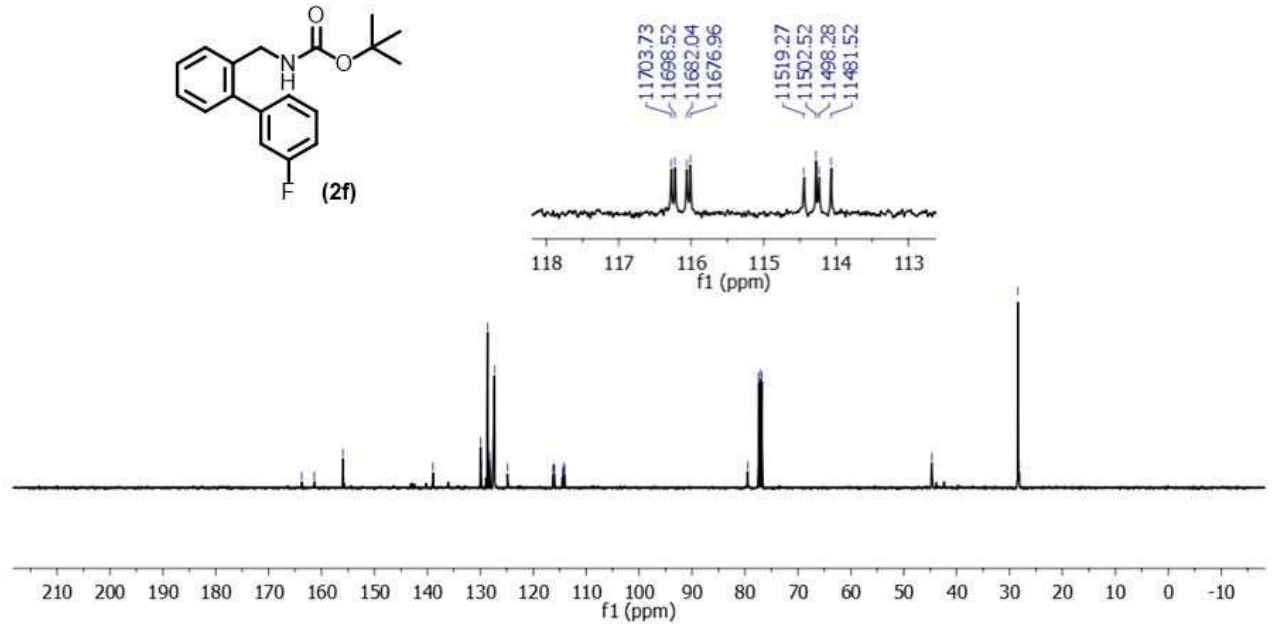

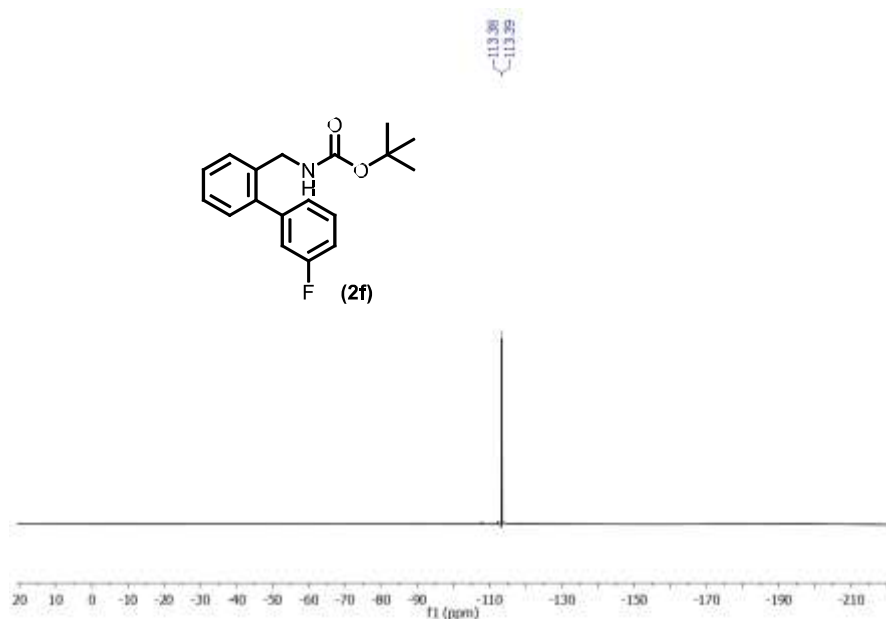

**Fig. S19**  $^1\text{H}$ ,  $^{13}\text{C}$  { $^1\text{H}$ },  $^{19}\text{F}$  NMR Spectra of compound **2f**.

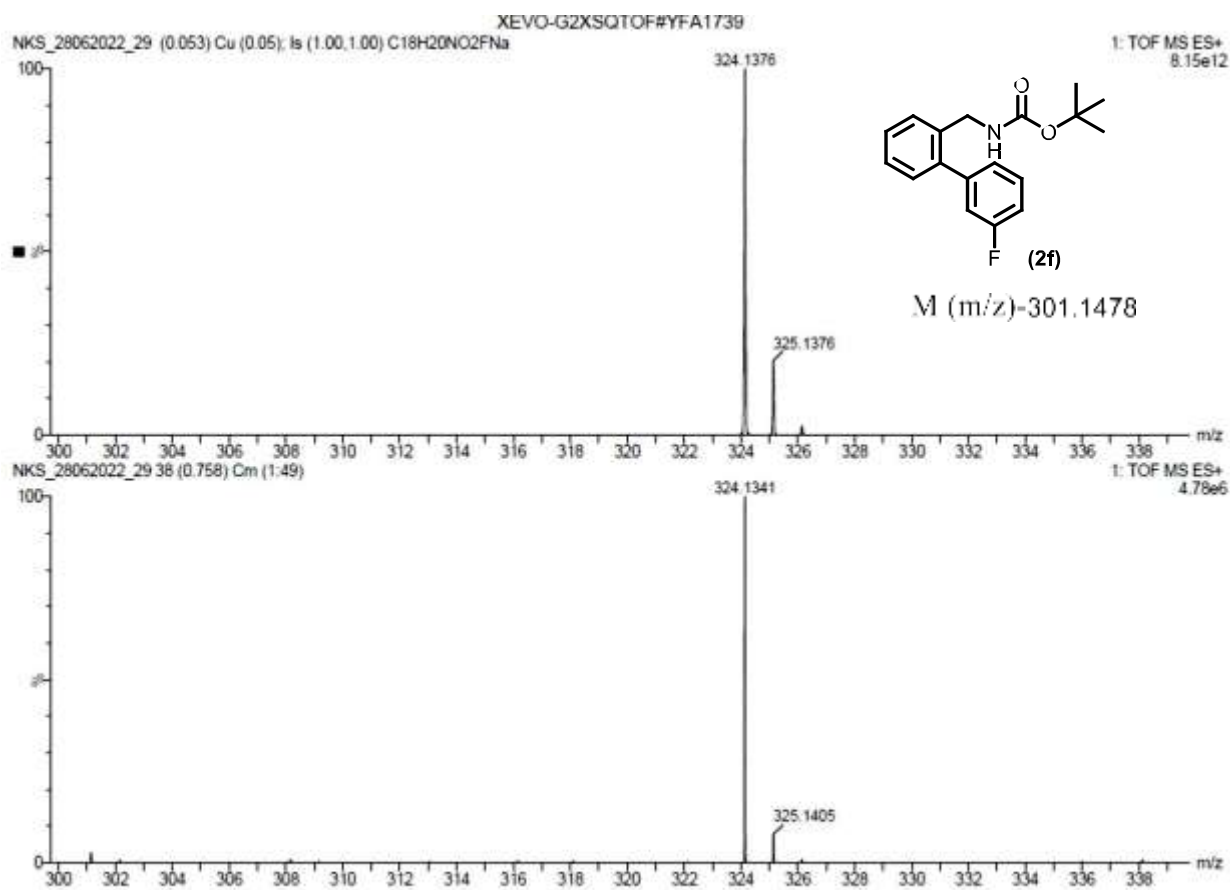

**Fig. S20** ESI-HRMS Spectra of compound **2f**.

$[\text{M}+\text{Na}]^+$

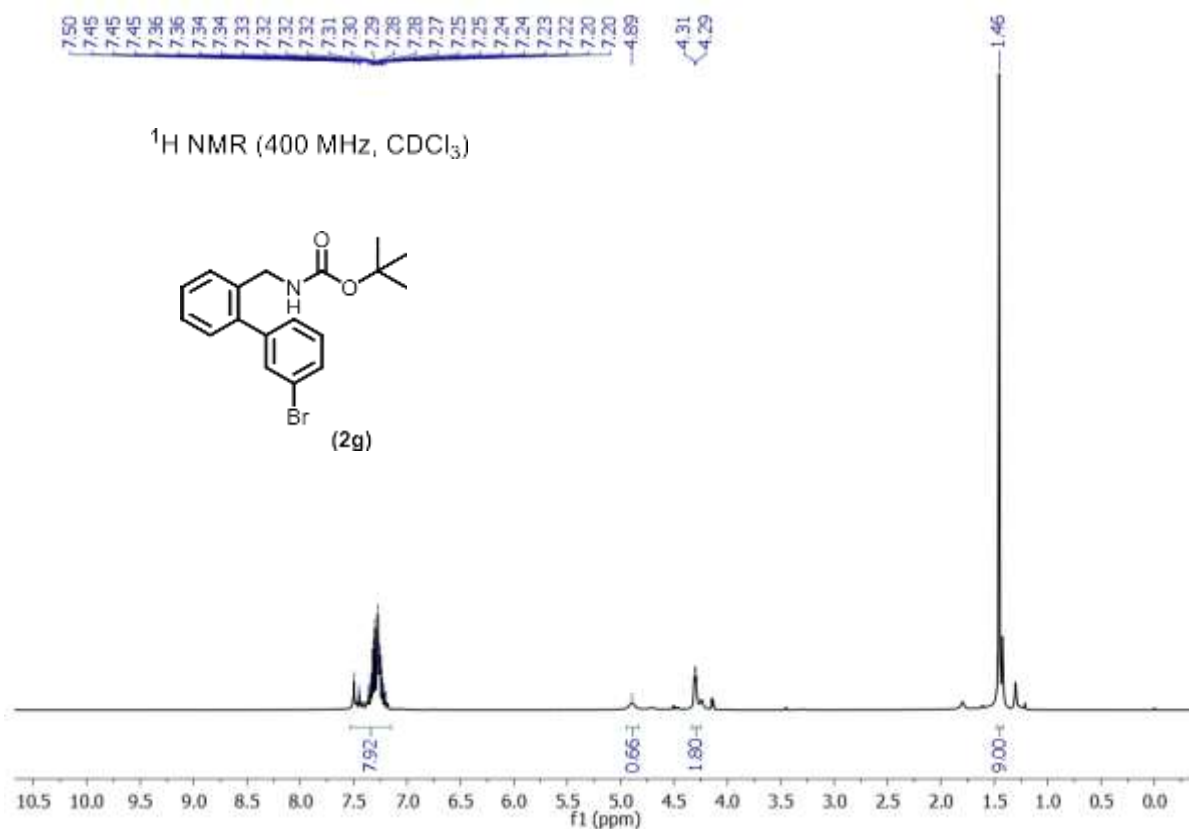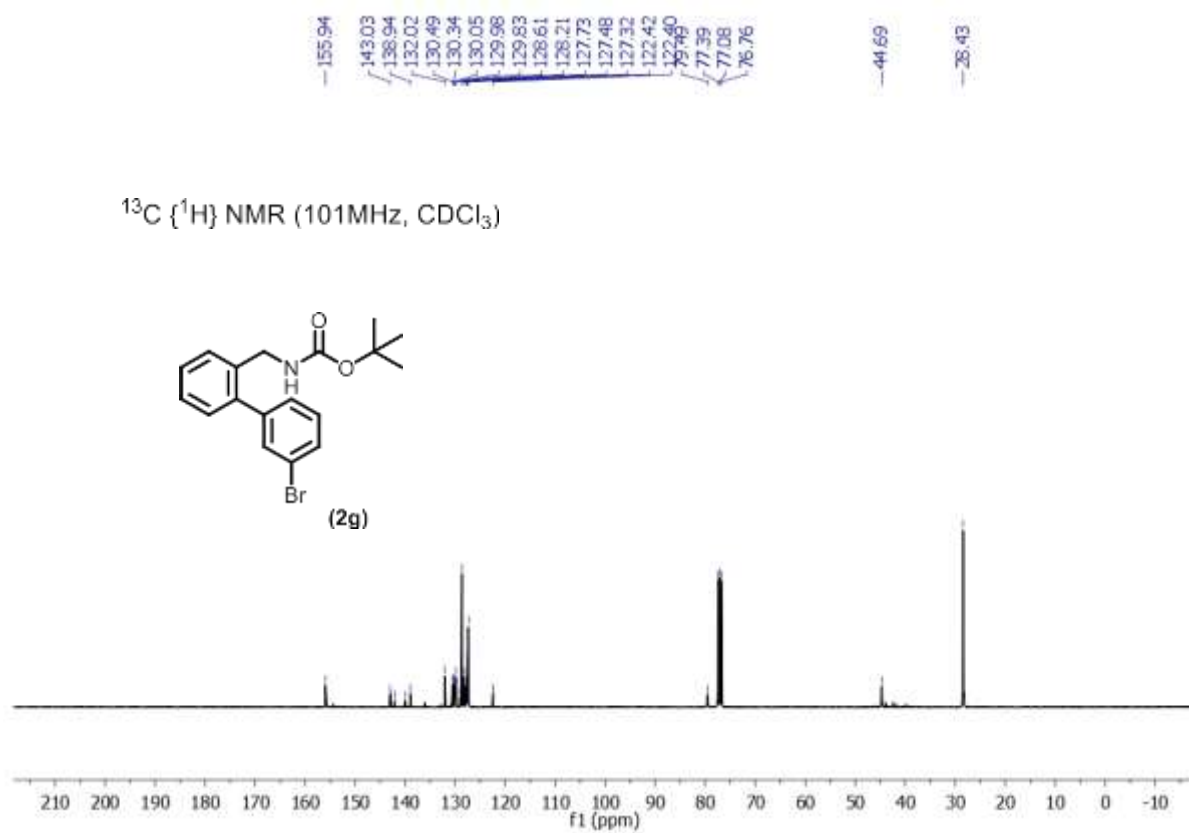

**Fig. S21** <sup>1</sup>H, <sup>13</sup>C {<sup>1</sup>H}, NMR Spectra of compound **2g**.

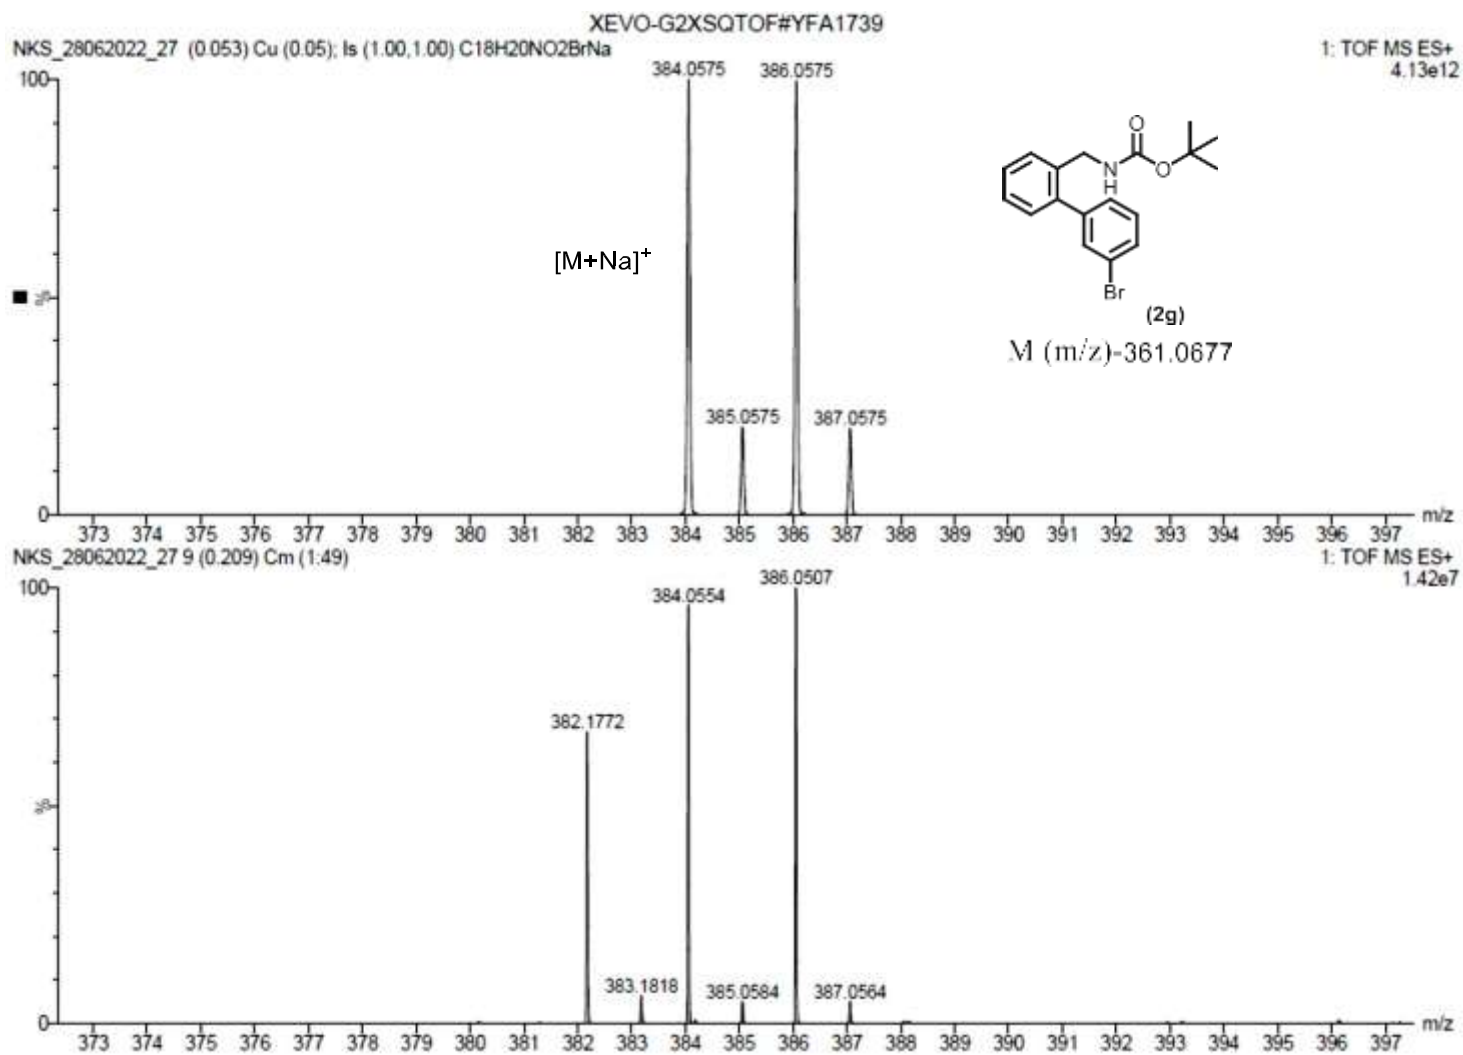

Fig. S22 ESI-HRMS Spectra of compound 2g.



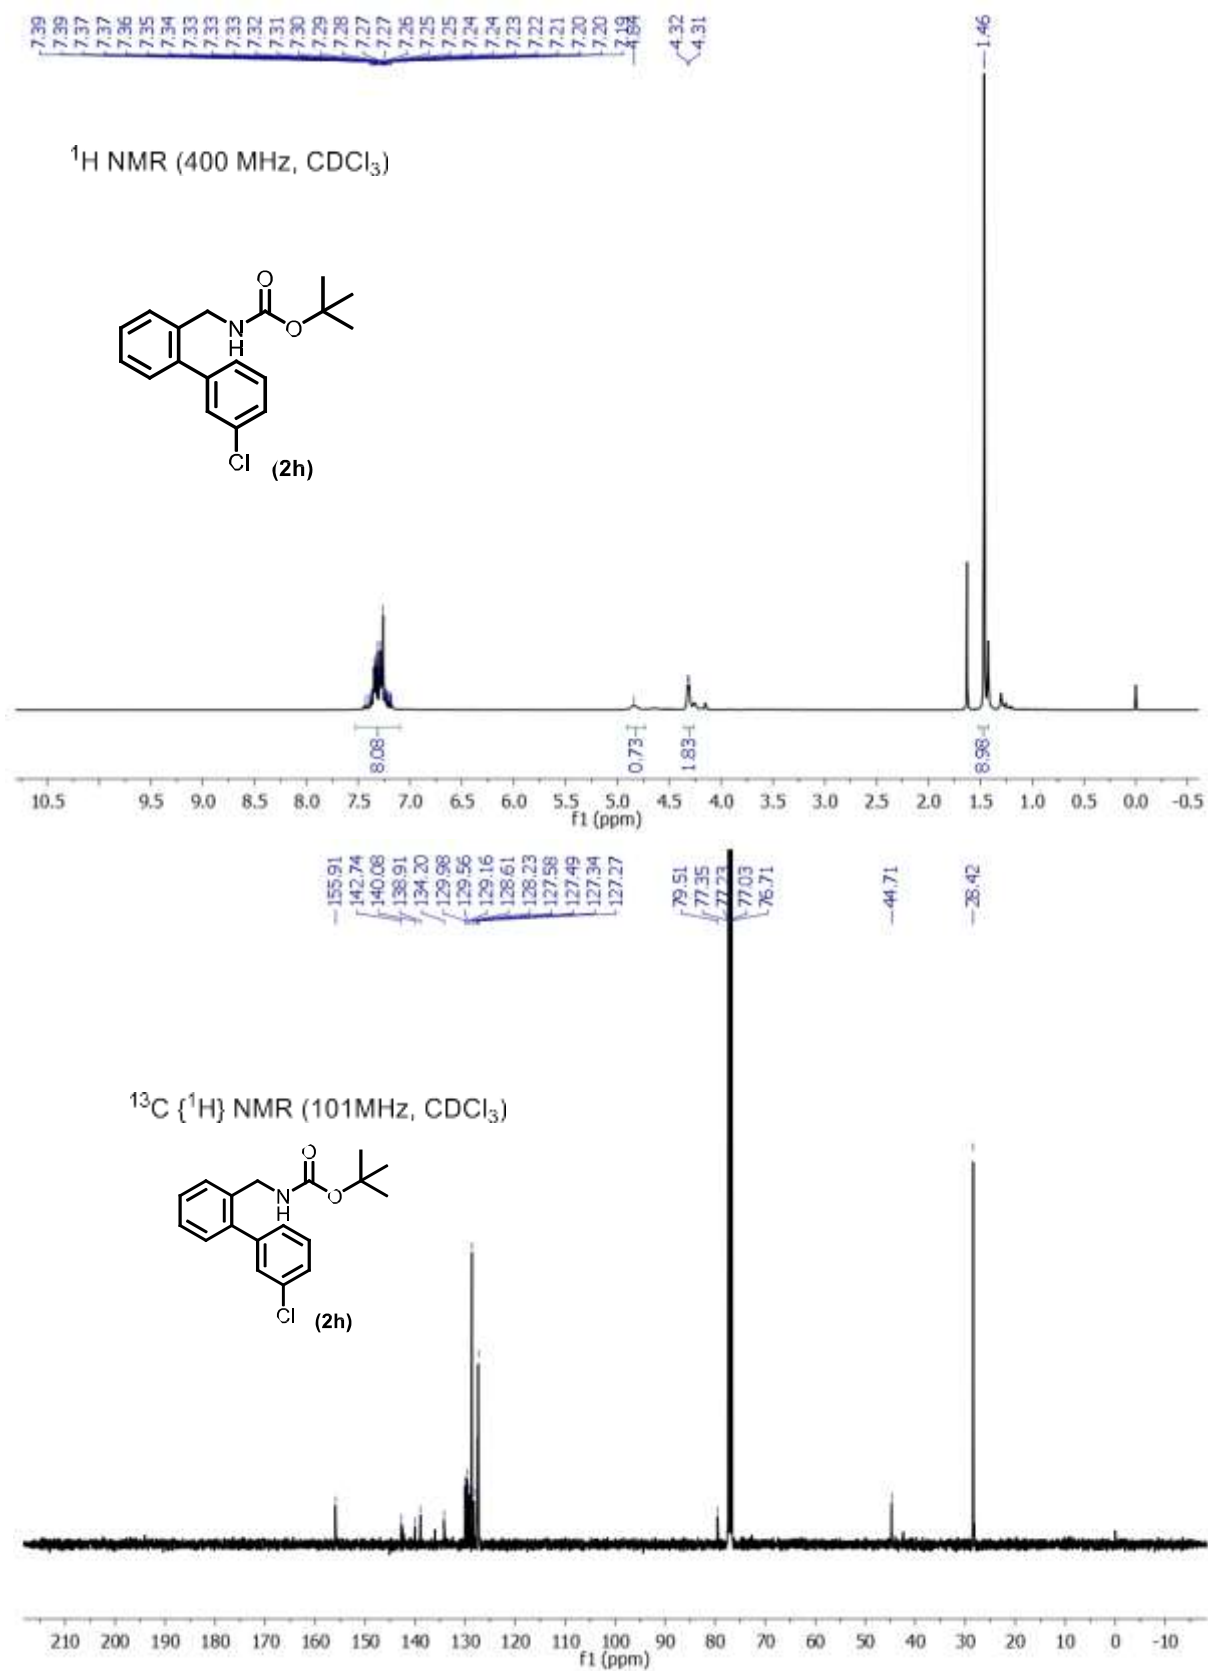

Fig. S23 <sup>1</sup>H, <sup>13</sup>C {<sup>1</sup>H}, NMR Spectra of compound **2h**.

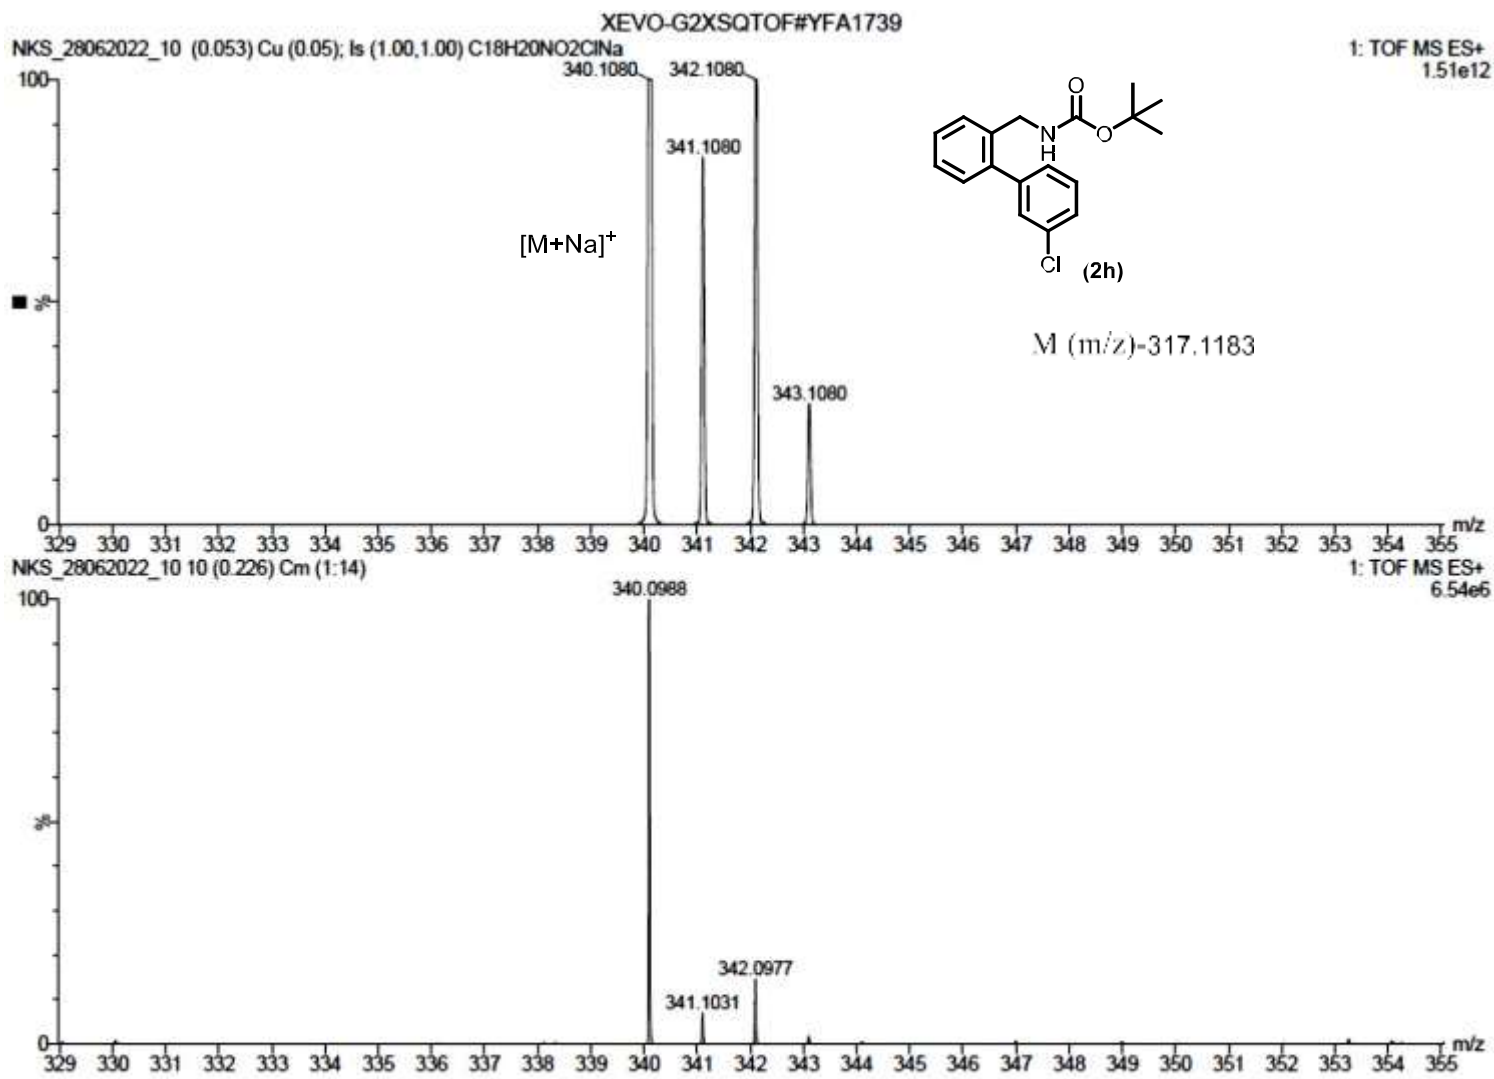

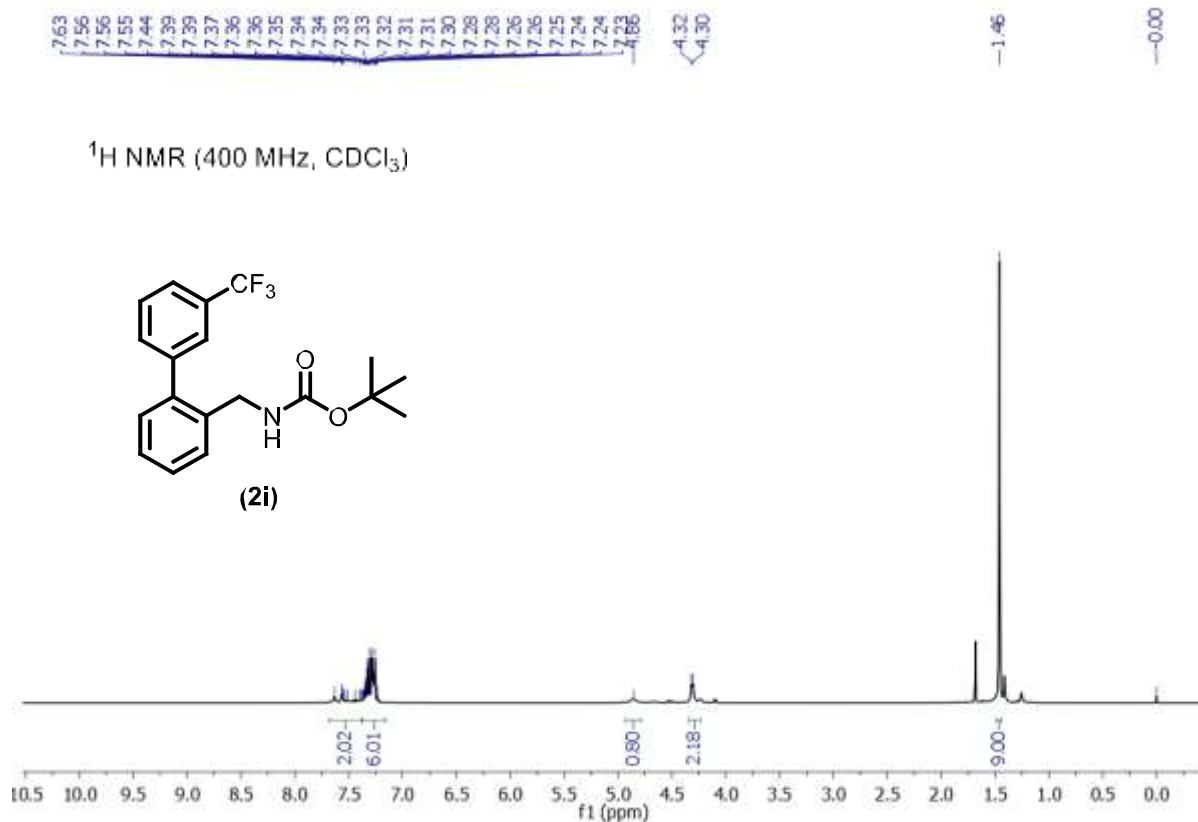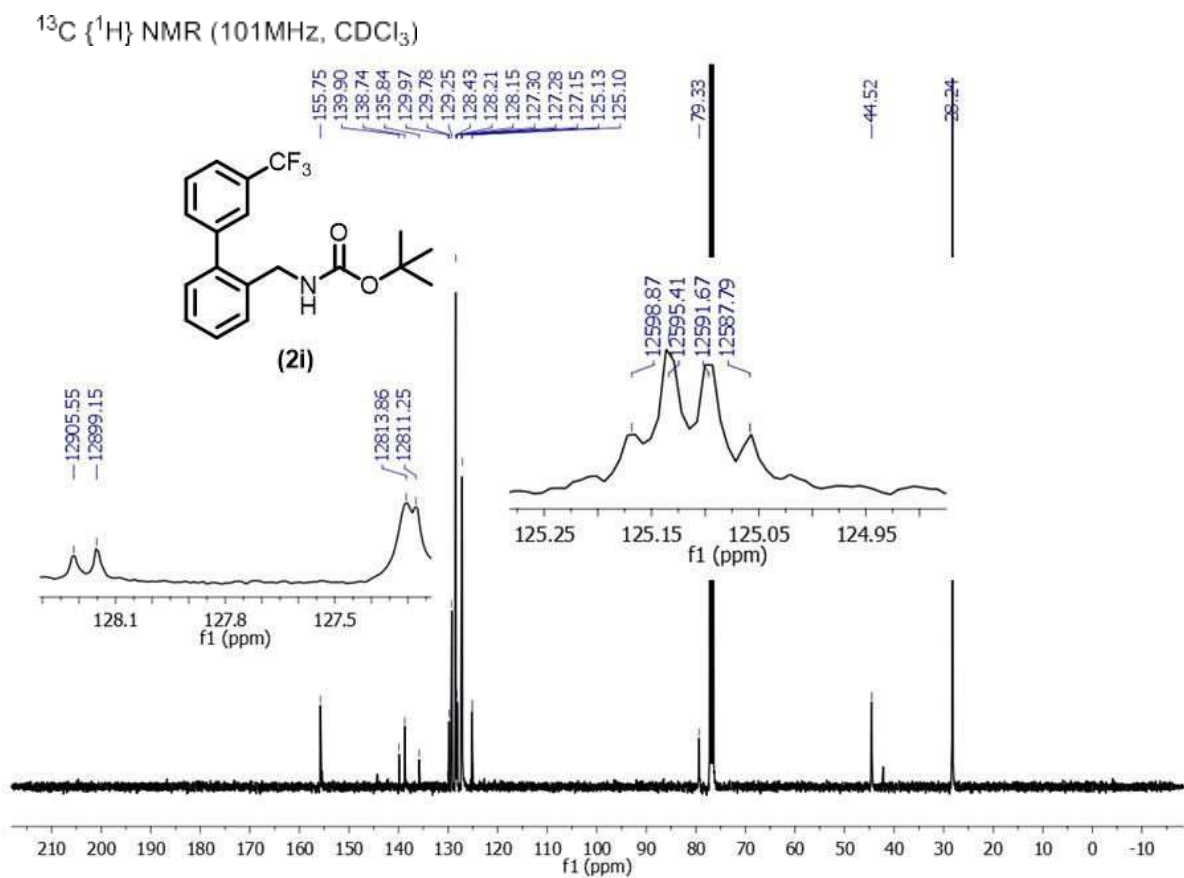

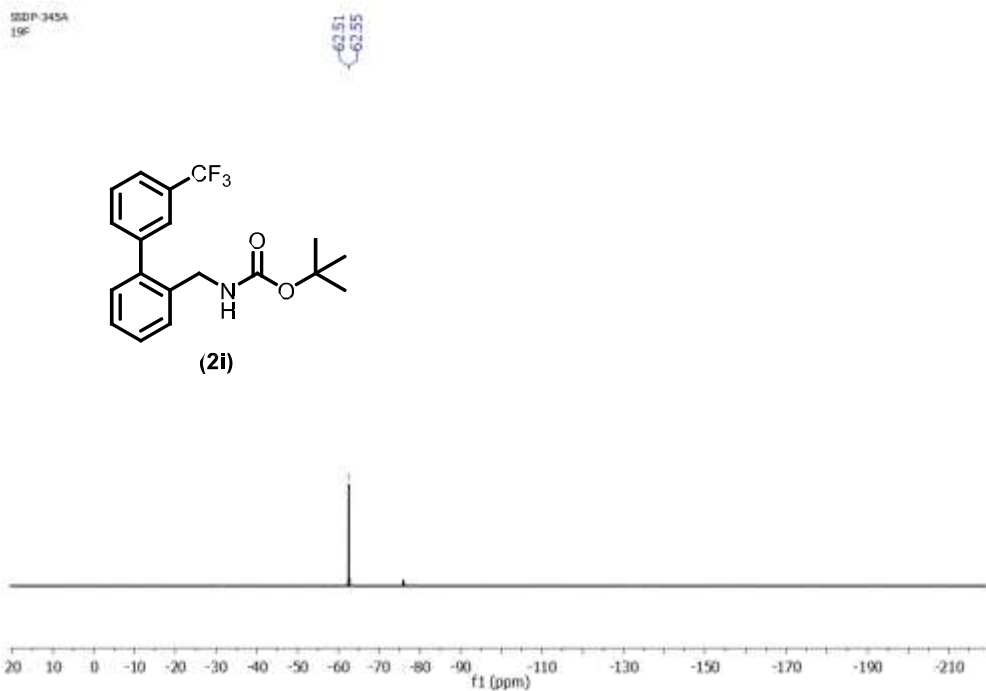

Fig. S25  $^1\text{H}$ ,  $^{13}\text{C}$  { $^1\text{H}$ }, NMR Spectra of compound 2i

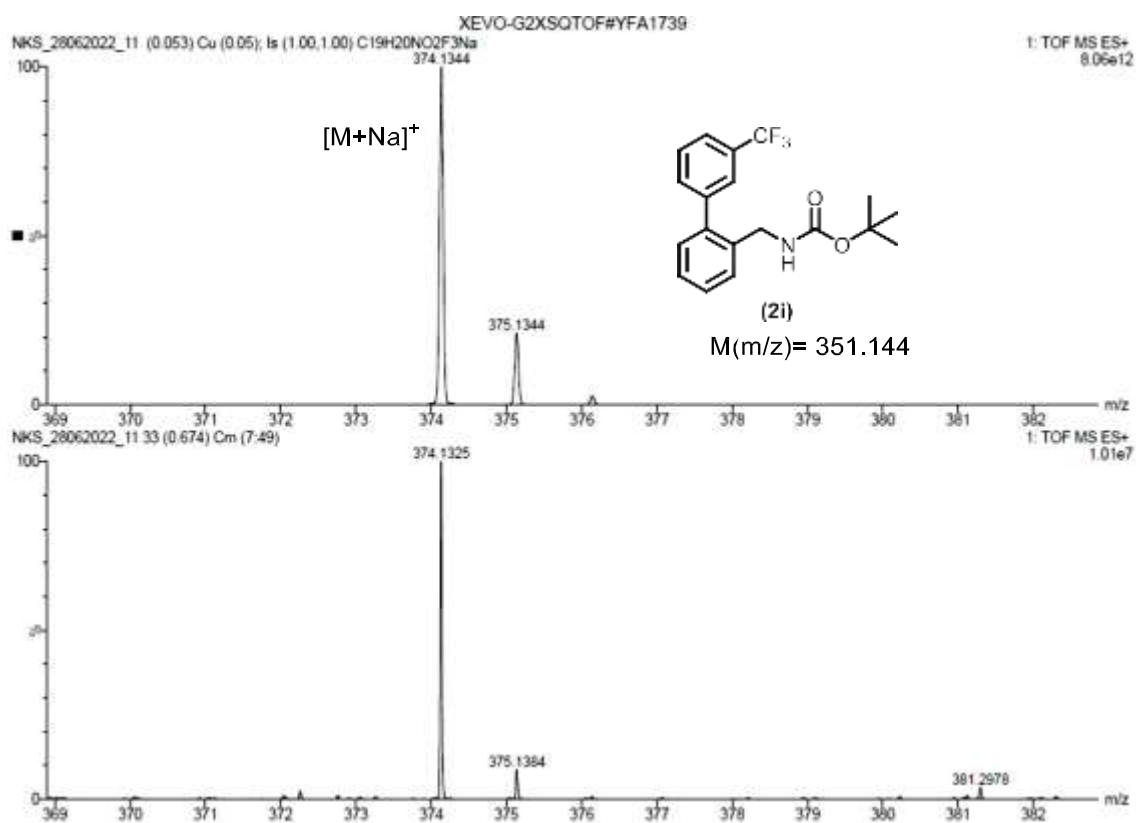

Fig. S26 ESI-HRMS Spectra of compound 2i.

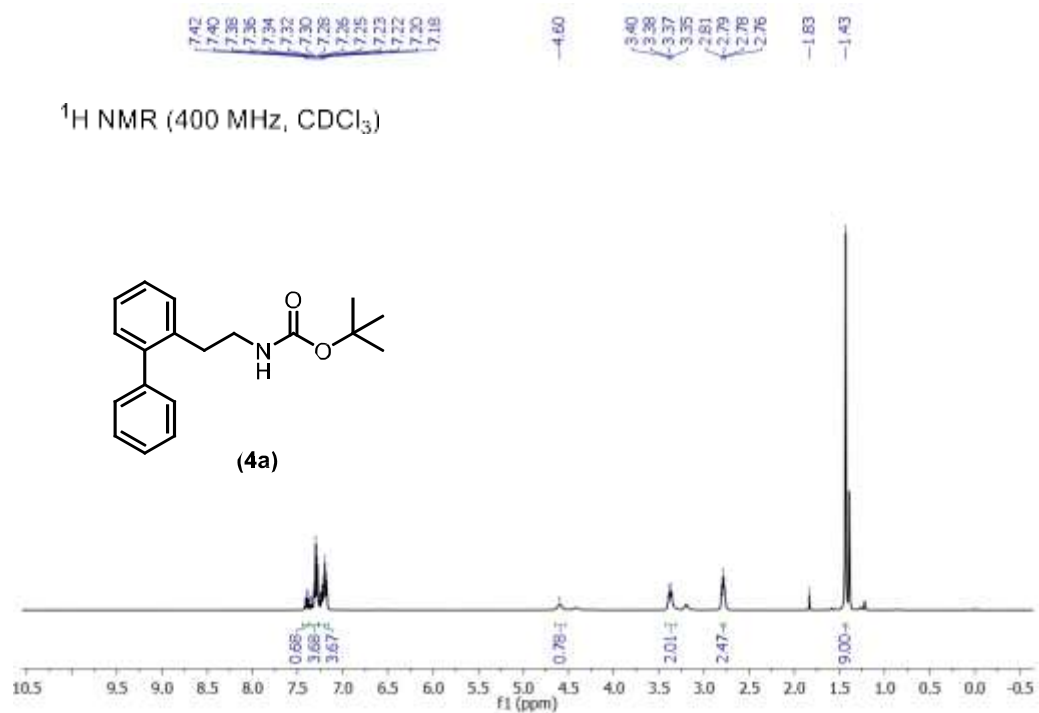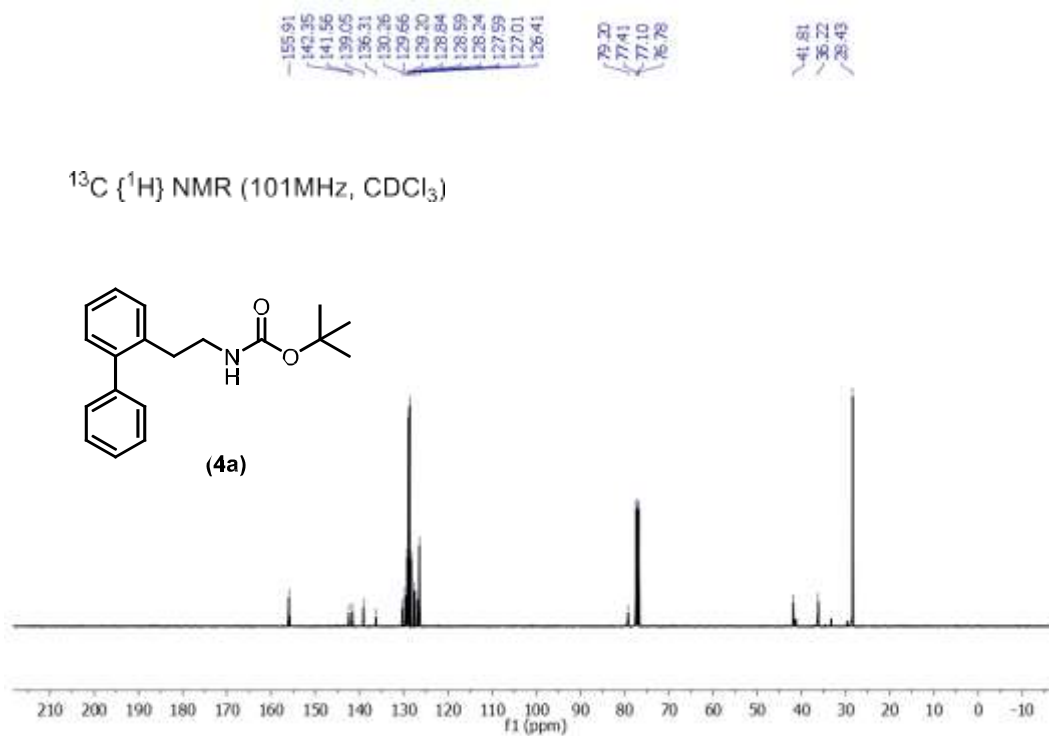

**Fig. S27** <sup>1</sup>H, <sup>13</sup>C {<sup>1</sup>H}, NMR Spectra of compound **4a**.

## Display Report

### Analysis Info

Analysis Name D:\Data\APR-2022\NKS\23042022\_NKS\_SSDP-303.d  
Method Pos\_tune\_low\_05122019.m  
Sample Name Tmix-131118  
Comment

Acquisition Date 4/23/2022 8:45:33 PM

Operator PRAKASH BEHERA  
Instrument micrOTOF-Q II 10337

### Acquisition Parameter

|             |            |                       |           |                  |           |
|-------------|------------|-----------------------|-----------|------------------|-----------|
| Source Type | ESI        | Ion Polarity          | Positive  | Set Nebulizer    | 0.5 Bar   |
| Focus       | Not active | Set Capillary         | 4500 V    | Set Dry Heater   | 180 °C    |
| Scan Begin  | 50 m/z     | Set End Plate Offset  | -500 V    | Set Dry Gas      | 4.0 l/min |
| Scan End    | 3000 m/z   | Set Collision Cell RF | 130.0 Vpp | Set Divert Valve | Waste     |

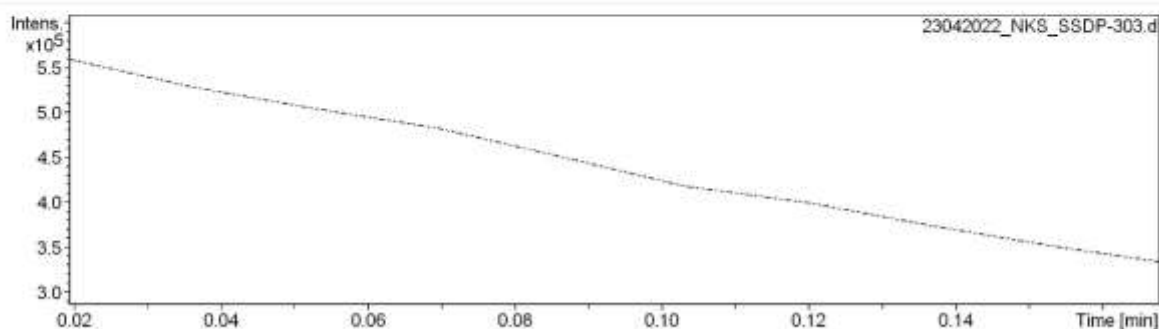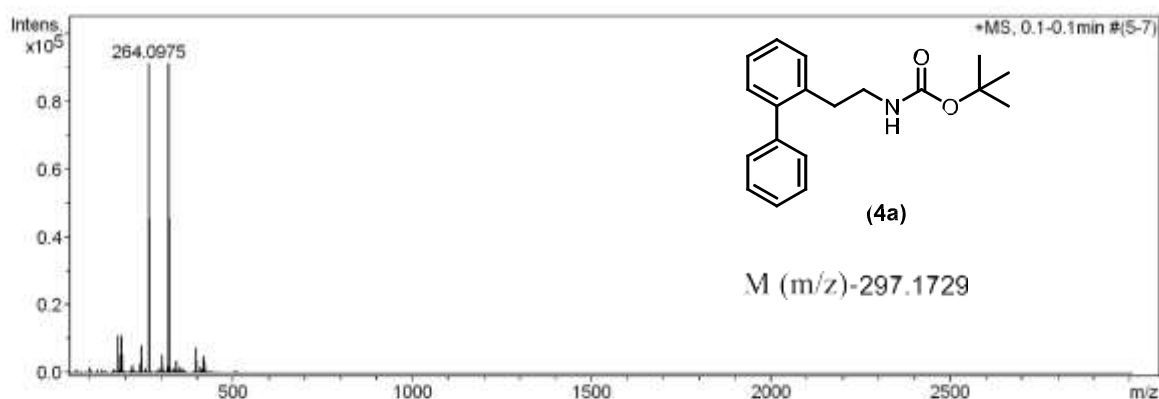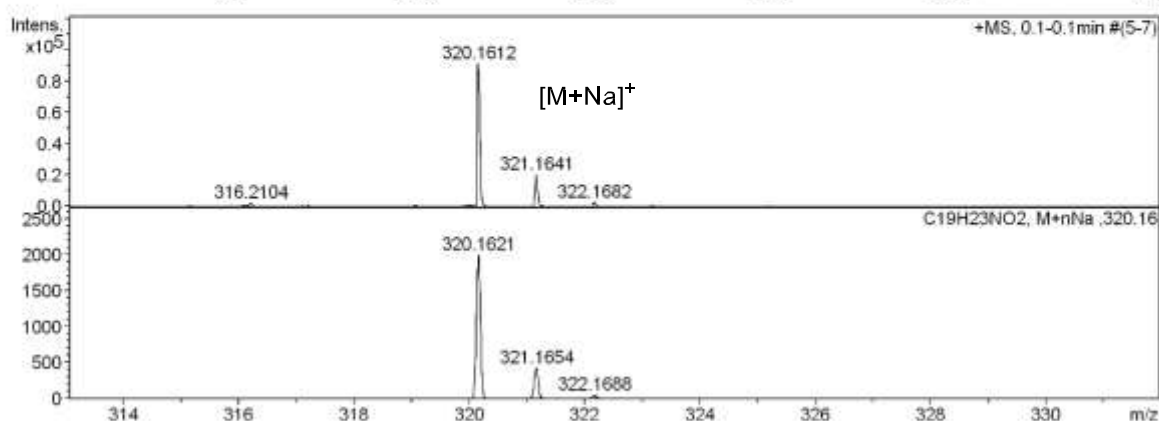

Fig. S28 ESI-HRMS Spectra of compound 4a.

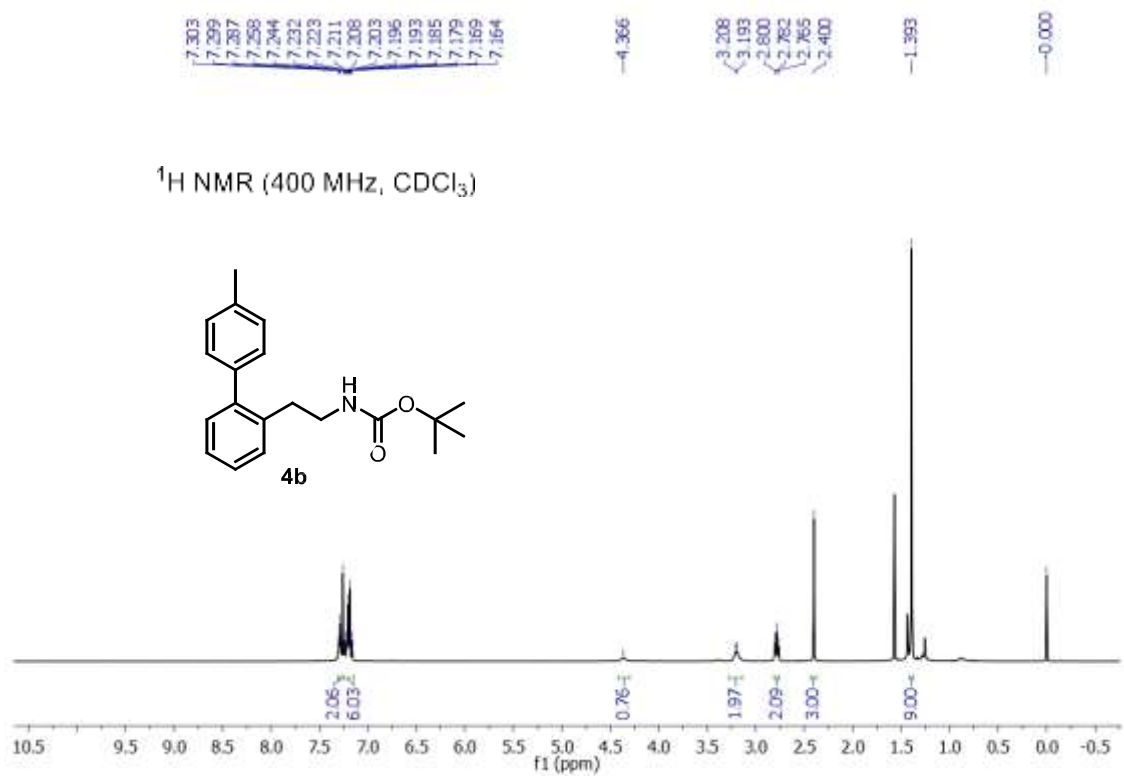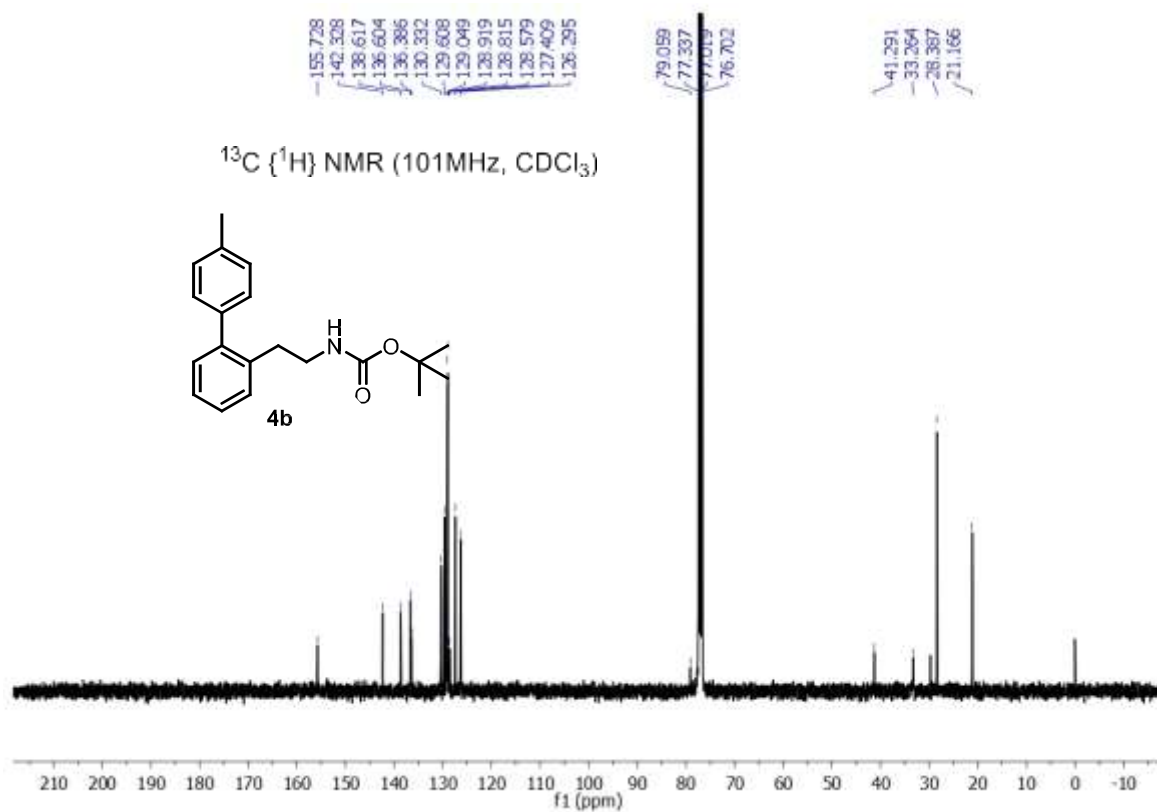

Fig. S29 <sup>1</sup>H, <sup>13</sup>C {<sup>1</sup>H}, NMR Spectra of compound **4b**

NKS\_SSDP\_317

28-Jun-2022  
23:25:56

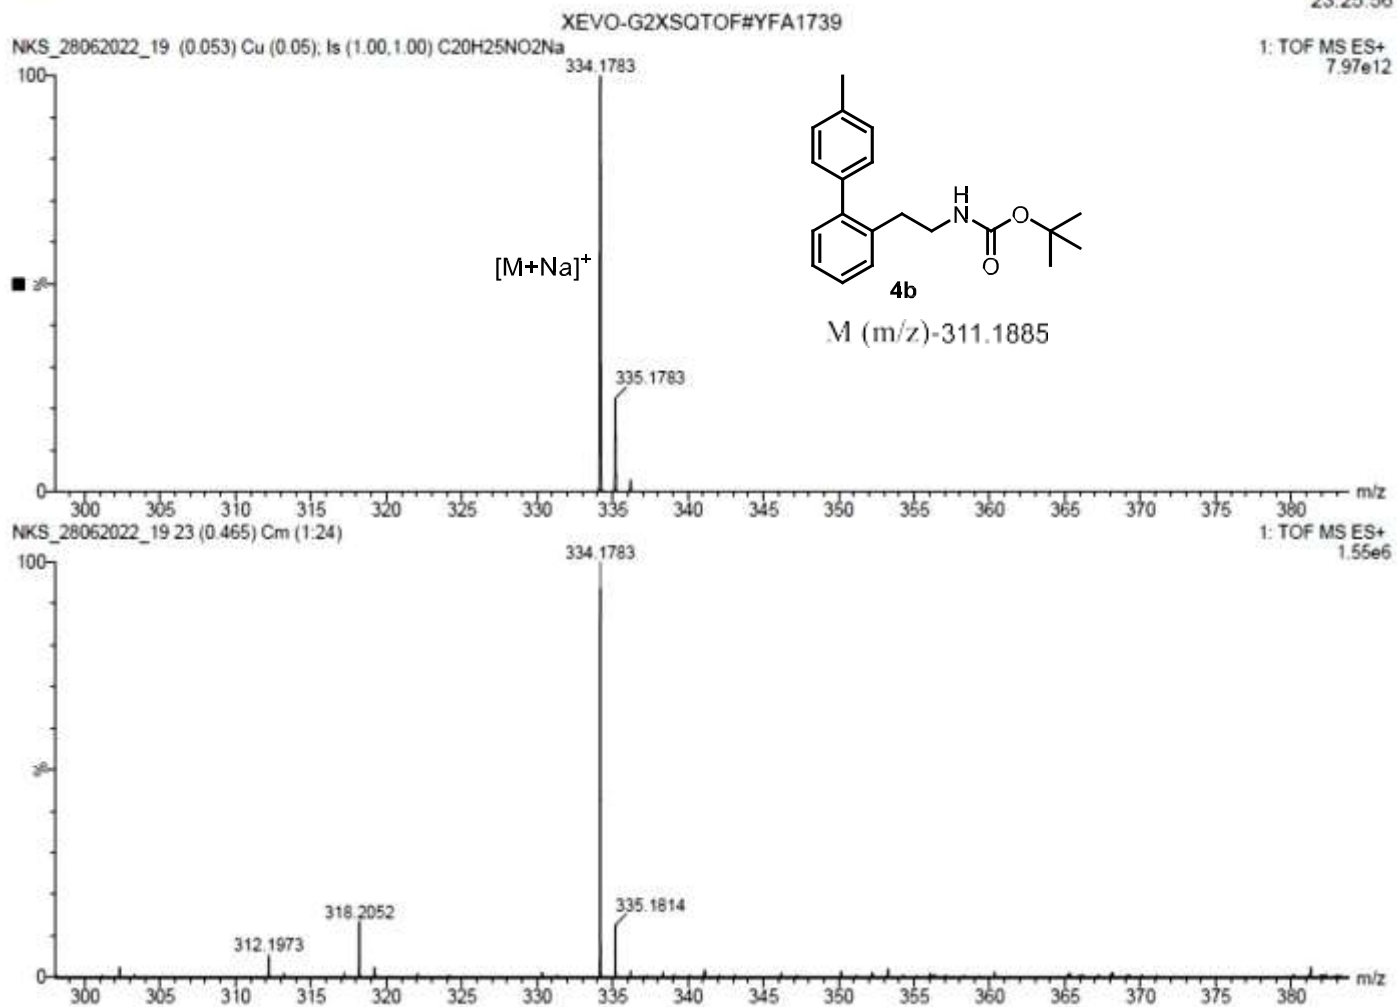

Fig. S30 ESI-HRMS Spectra of compound 4b.



7.68 7.66 7.43 7.41 7.36 7.34 7.32 7.30 7.29 7.26 7.24 7.22 7.20 7.18 -4.57 3.39 3.37 3.36 3.22 3.20 2.81 2.79 2.77 2.75 2.74 -1.43

<sup>1</sup>H NMR (400 MHz, CDCl<sub>3</sub>)

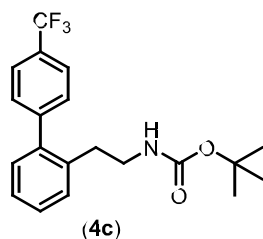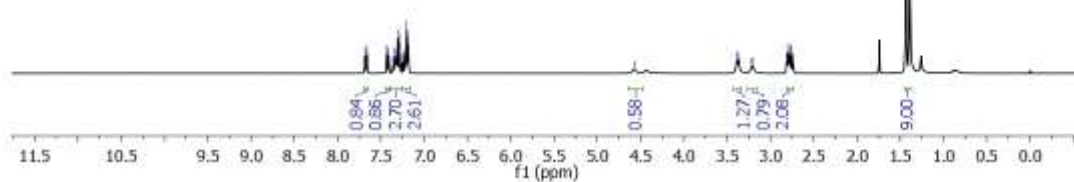

155.90 145.27 140.91 139.03 136.19 130.02 129.83 129.62 128.83 128.58 128.26 126.53 126.41 125.27 125.23 125.20 125.16 -79.23 41.79 36.21 33.26 28.41

<sup>13</sup>C {<sup>1</sup>H} NMR (101MHz, CDCl<sub>3</sub>)

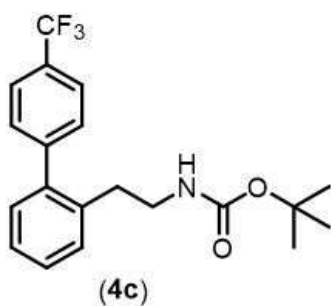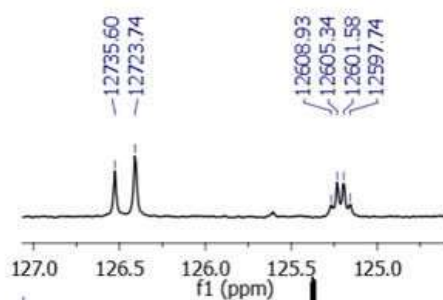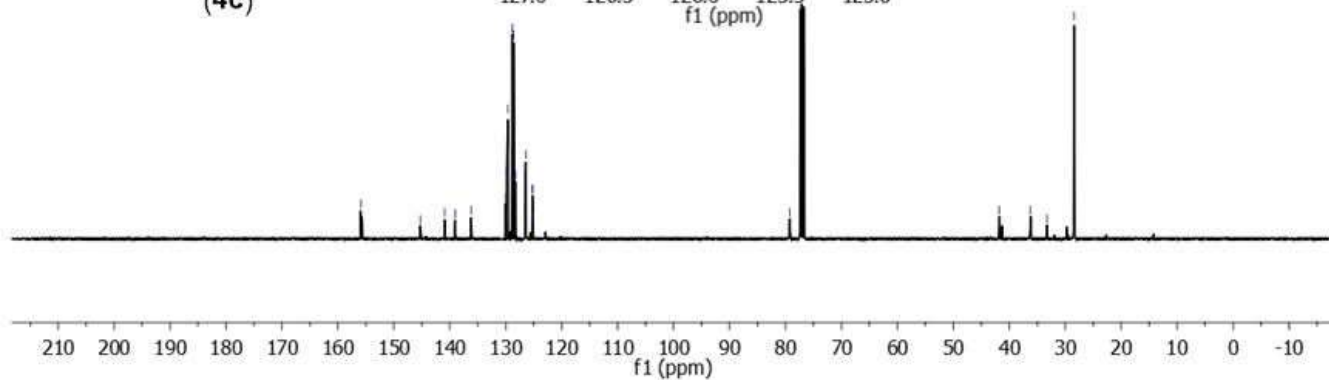

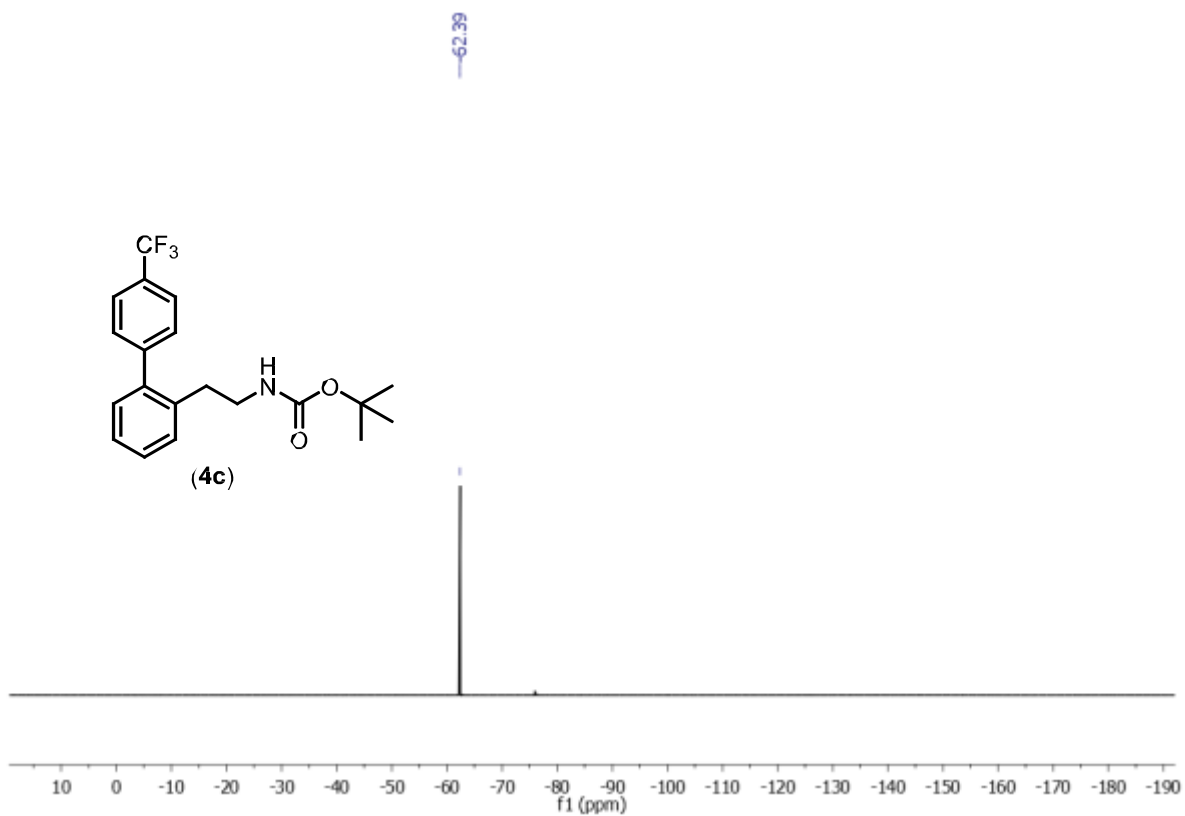

**Fig. S31**  $^1\text{H}$ ,  $^{13}\text{C}$  { $^1\text{H}$ },  $^{19}\text{F}$  NMR Spectra of compound **4c**.

## Display Report

### Analysis Info

Analysis Name D:\Data\APR-2022\NKS\23042022\_NKS\_SSDP-320.d  
Method Pos\_tune\_low\_05122019.m  
Sample Name Tmix-131118  
Comment

Acquisition Date 4/23/2022 8:51:09 PM

Operator PRAKASH BEHERA  
Instrument micrOTOF-Q II 10337

### Acquisition Parameter

|             |            |                       |           |                  |           |
|-------------|------------|-----------------------|-----------|------------------|-----------|
| Source Type | ESI        | Ion Polarity          | Positive  | Set Nebulizer    | 0.5 Bar   |
| Focus       | Not active | Set Capillary         | 4500 V    | Set Dry Heater   | 180 °C    |
| Scan Begin  | 50 m/z     | Set End Plate Offset  | -500 V    | Set Dry Gas      | 4.0 l/min |
| Scan End    | 3000 m/z   | Set Collision Cell RF | 130.0 Vpp | Set Divert Valve | Waste     |

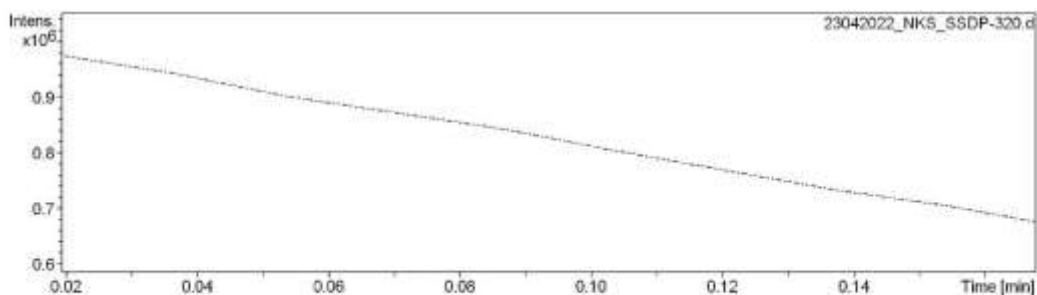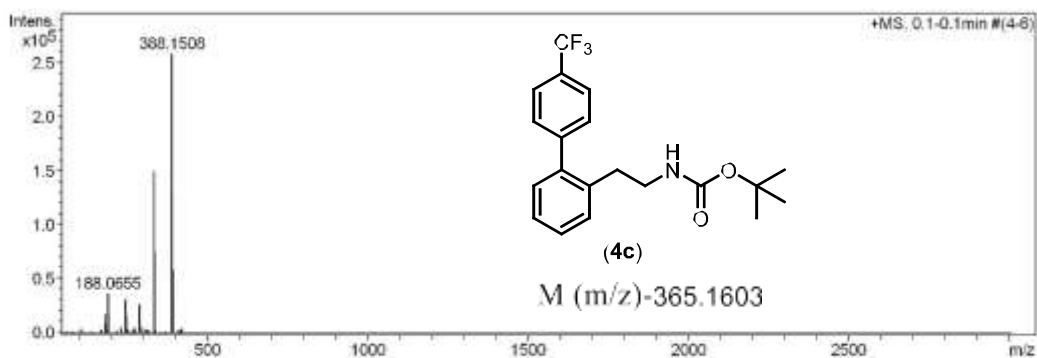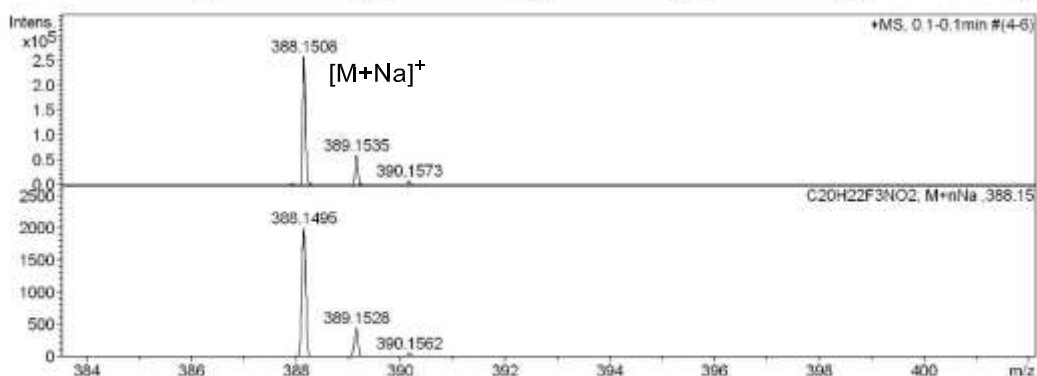

Fig. S32 ESI-HRMS Spectra of compound 4c.

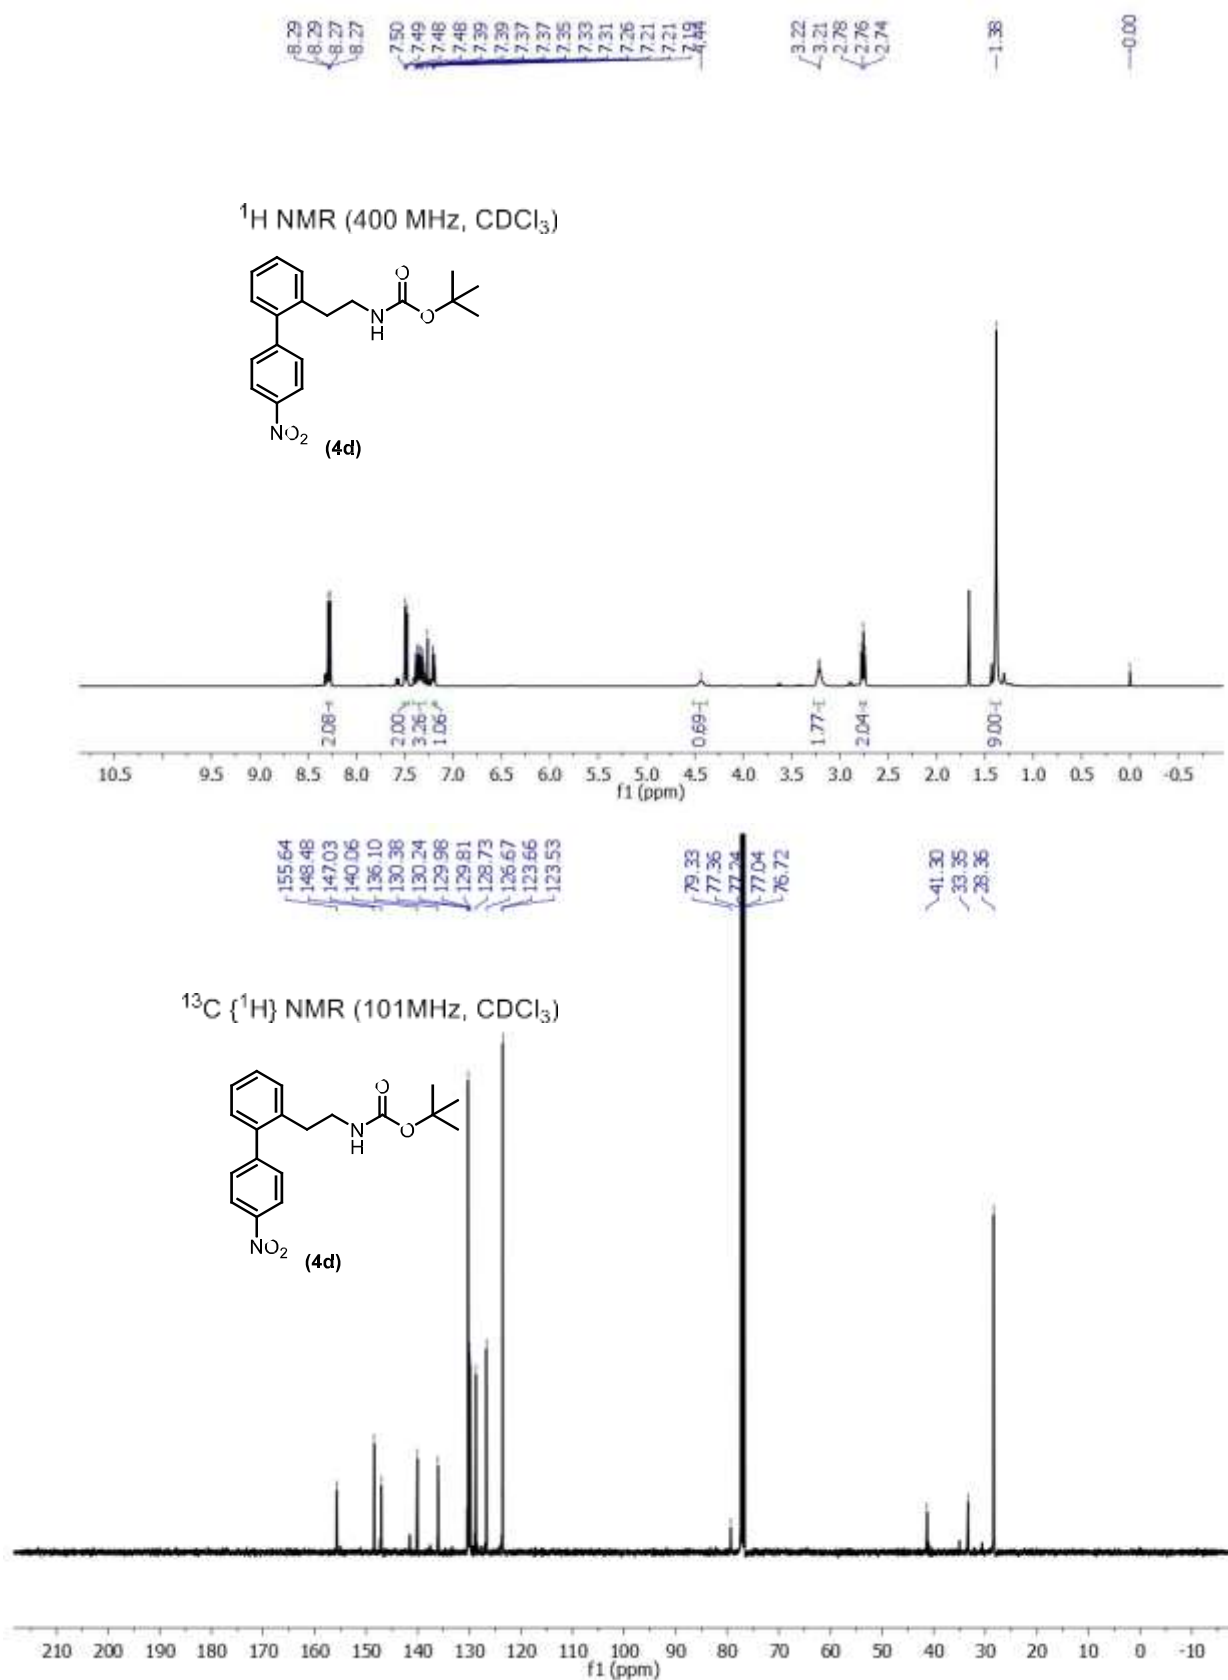

**Fig. S33** <sup>1</sup>H, <sup>13</sup>C {<sup>1</sup>H}, NMR Spectra of compound **4d**.

## Display Report

### Analysis Info

Analysis Name D:\Data\MAY-2022\NKS\15052022\_NKS\_SSDP-338.d  
Method Pos\_tune\_low\_21042022.m  
Sample Name Tmix-131118  
Comment

Acquisition Date 5/15/2022 11:24:09 PM

Operator Amit S.Sahu  
Instrument micrOTOF-Q II 10337

### Acquisition Parameter

|             |            |                       |           |                  |           |
|-------------|------------|-----------------------|-----------|------------------|-----------|
| Source Type | ESI        | Ion Polarity          | Positive  | Set Nebulizer    | 0.5 Bar   |
| Focus       | Not active | Set Capillary         | 4500 V    | Set Dry Heater   | 180 °C    |
| Scan Begin  | 50 m/z     | Set End Plate Offset  | -500 V    | Set Dry Gas      | 4.0 l/min |
| Scan End    | 3000 m/z   | Set Collision Cell RF | 130.0 Vpp | Set Divert Valve | Waste     |

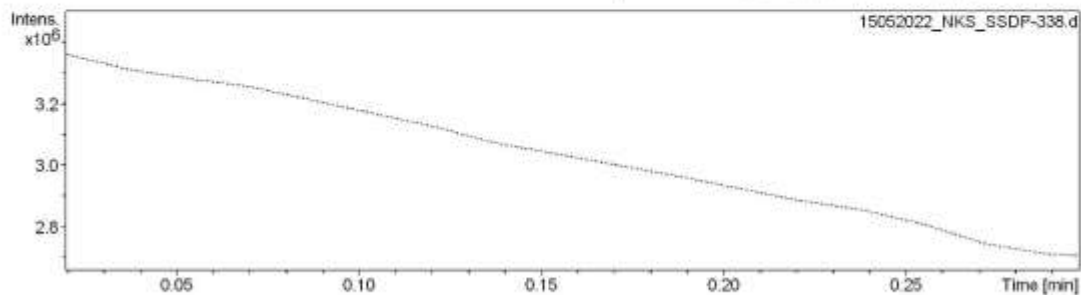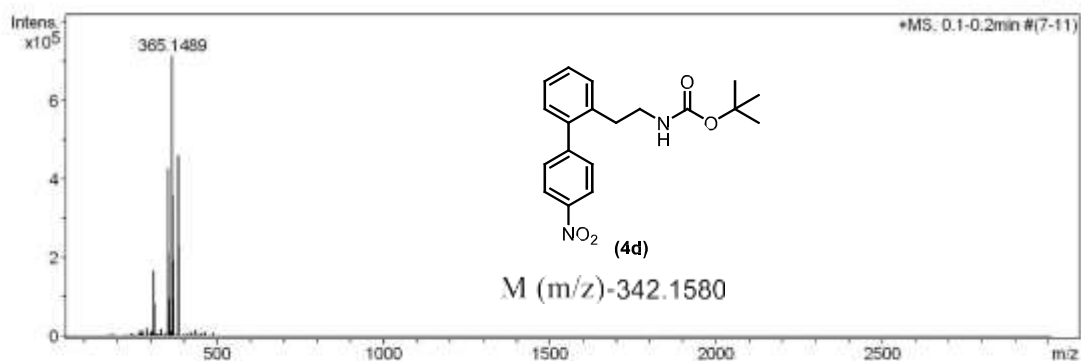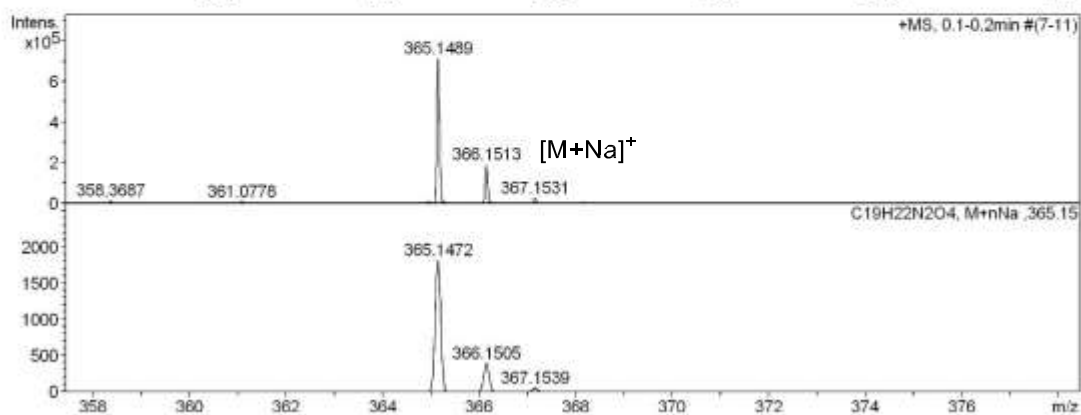

Fig. S34 ESI-HRMS Spectra of compound 4d.

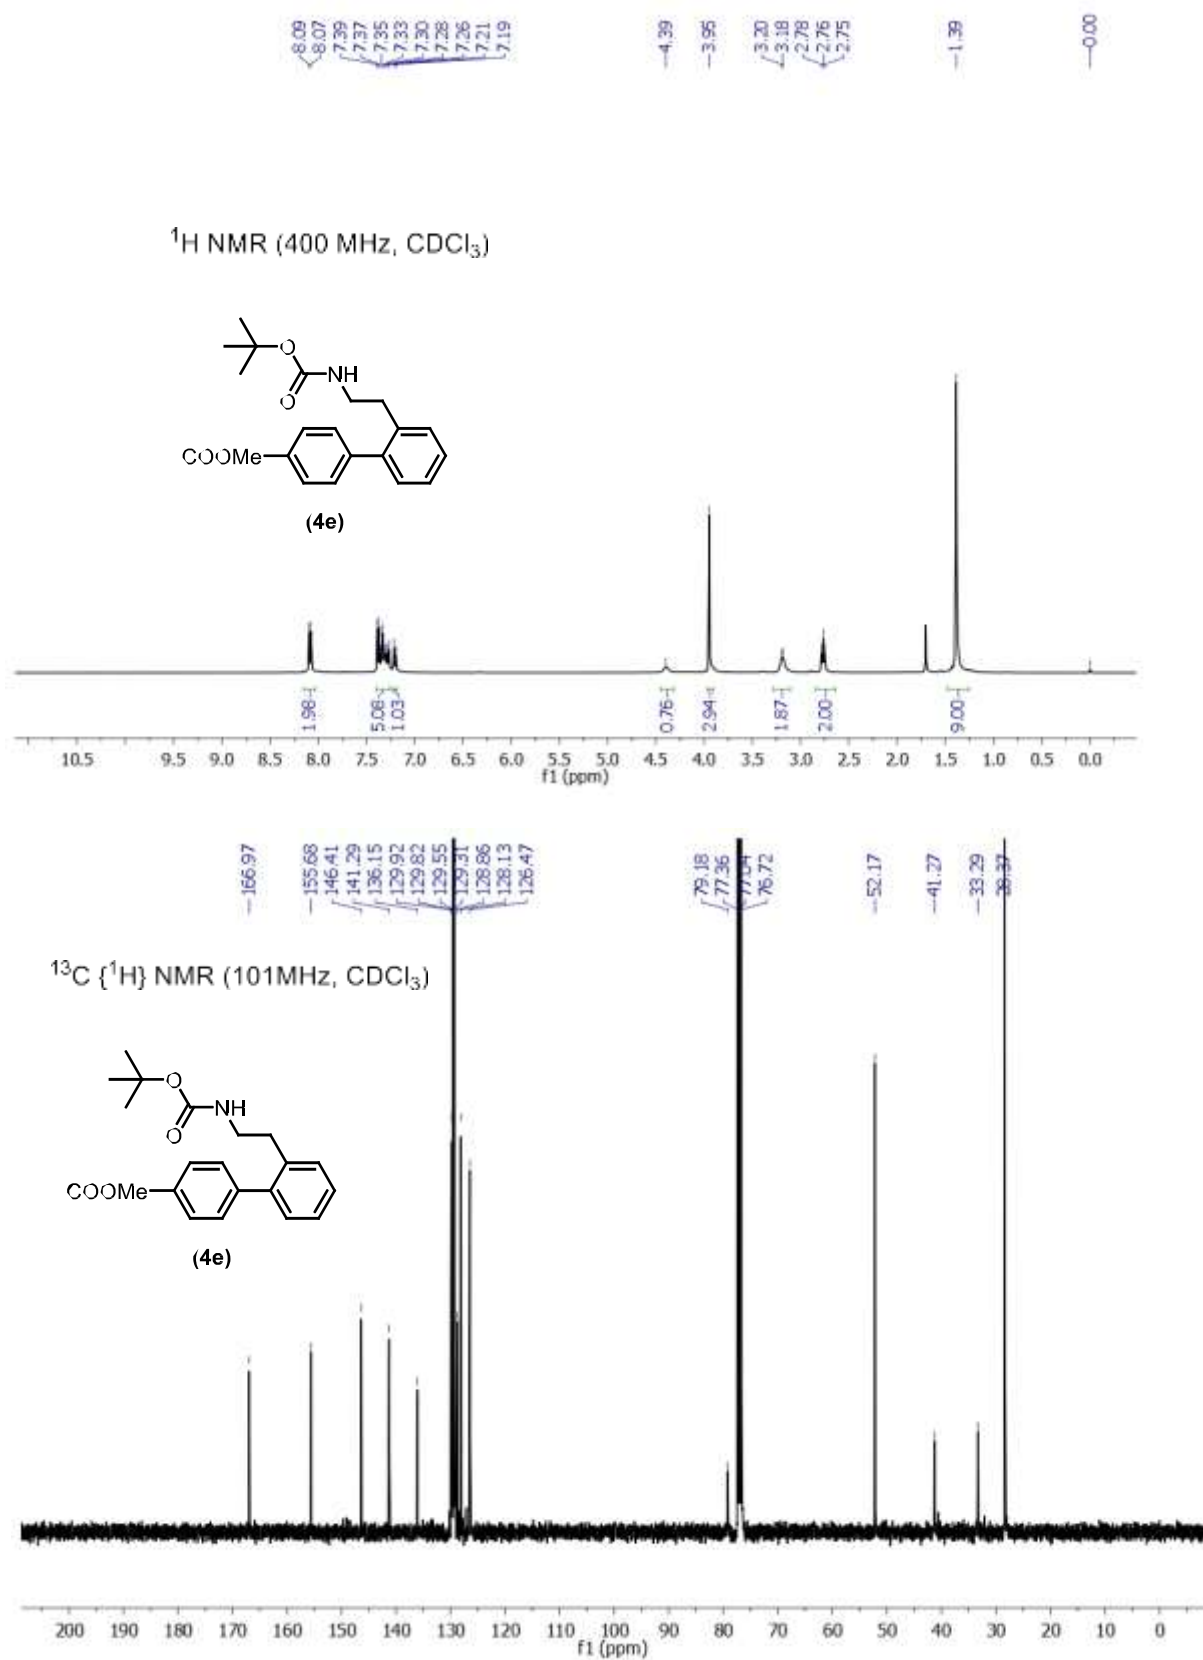

**Fig. S35** <sup>1</sup>H, <sup>13</sup>C {<sup>1</sup>H}, NMR Spectra of compound **4e**.

# Display Report

## Analysis Info

Analysis Name D:\Data\MAY-2022\NKS\15052022\_NKS\_SSDP-355.d  
Method Pos\_tune\_low\_21042022.m  
Sample Name Tmix-131118  
Comment

Acquisition Date 5/15/2022 11:37:41 PM

Operator Amit S.Sahu  
Instrument micrOTOF-Q II 10337

## Acquisition Parameter

|             |            |                       |           |                  |           |
|-------------|------------|-----------------------|-----------|------------------|-----------|
| Source Type | ESI        | Ion Polarity          | Positive  | Set Nebulizer    | 0.5 Bar   |
| Focus       | Not active | Set Capillary         | 4500 V    | Set Dry Heater   | 180 °C    |
| Scan Begin  | 50 m/z     | Set End Plate Offset  | -500 V    | Set Dry Gas      | 4.0 l/min |
| Scan End    | 3000 m/z   | Set Collision Cell RF | 130.0 Vpp | Set Divert Valve | Waste     |

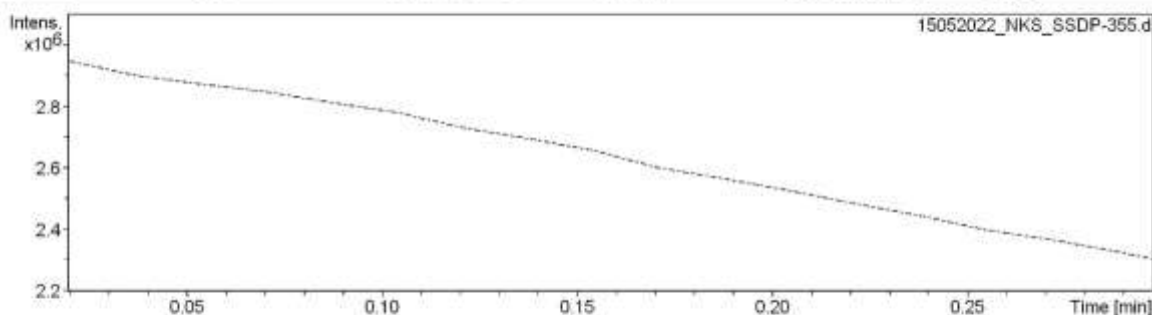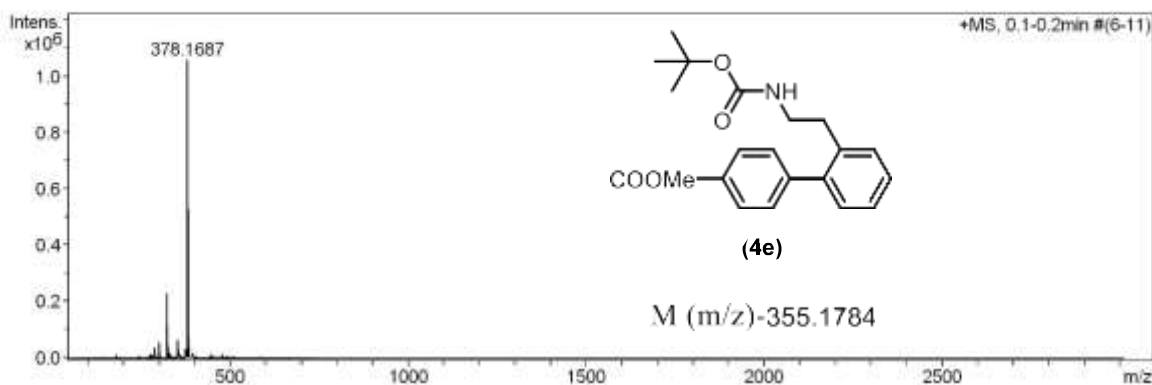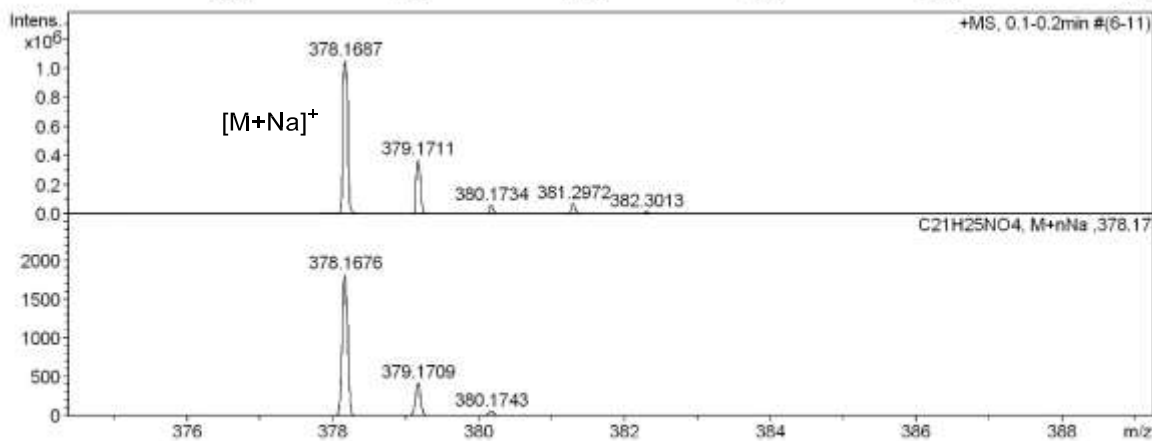

Fig. S36 ESI-HRMS Spectra of compound 4e.

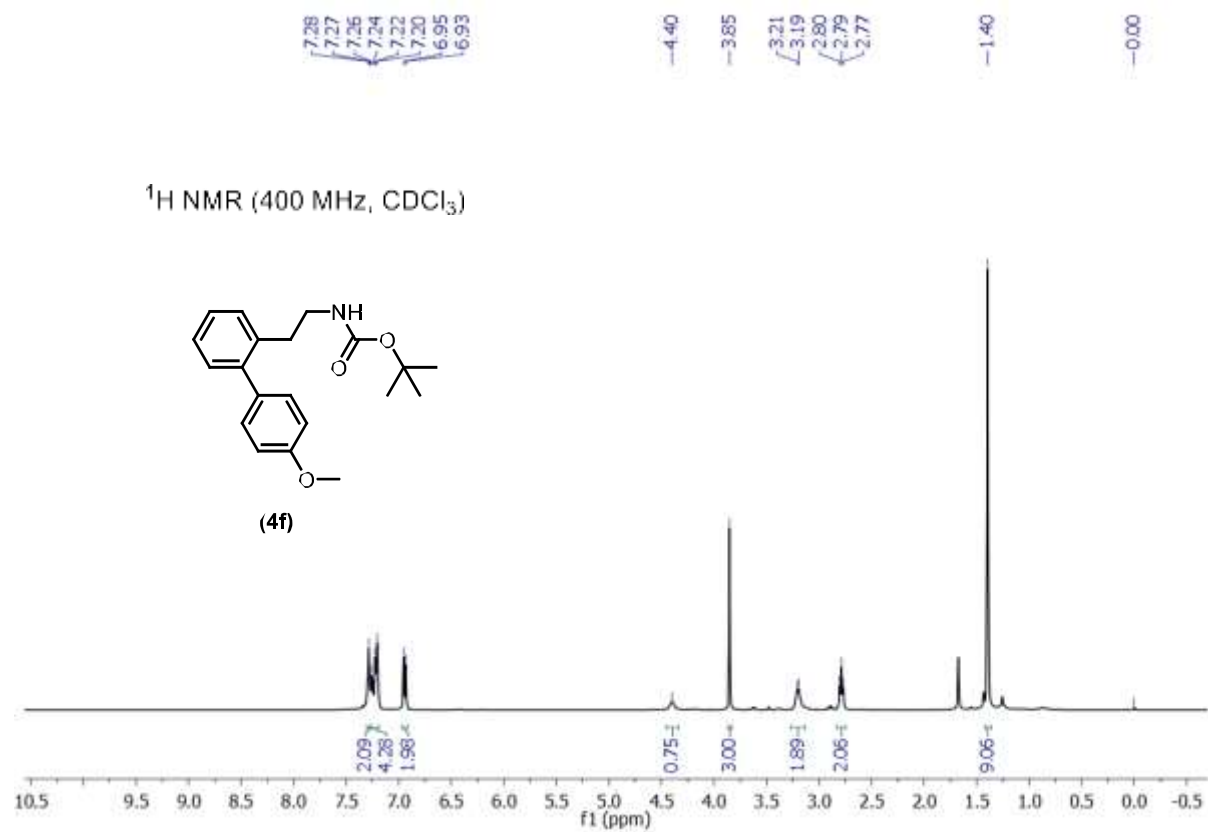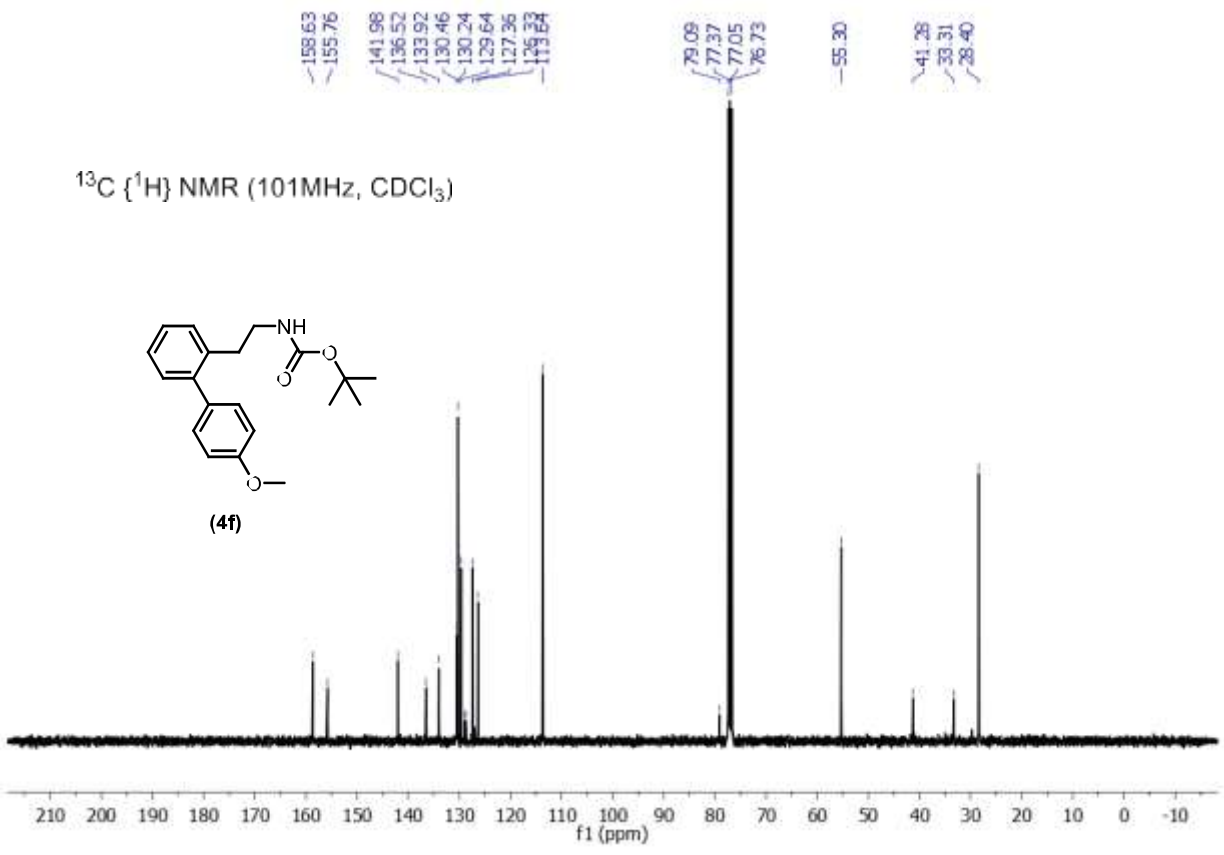

**Fig. S37** <sup>1</sup>H, <sup>13</sup>C {<sup>1</sup>H}, NMR Spectra of compound **4f**.



## Display Report

### Analysis Info

Analysis Name D:\Data\APR-2022\NKS\23042022\_NKS\_SSDP-318 S1.d  
Method Pos\_tune\_low\_05122019.m  
Sample Name Tmix-131118  
Comment

Acquisition Date 4/23/2022 8:32:43 PM

Operator PRAKASH BEHERA  
Instrument micrOTOF-Q II 10337

### Acquisition Parameter

|             |            |                       |           |                  |           |
|-------------|------------|-----------------------|-----------|------------------|-----------|
| Source Type | ESI        | Ion Polarity          | Positive  | Set Nebulizer    | 0.5 Bar   |
| Focus       | Not active | Set Capillary         | 4500 V    | Set Dry Heater   | 180 °C    |
| Scan Begin  | 50 m/z     | Set End Plate Offset  | -500 V    | Set Dry Gas      | 4.0 l/min |
| Scan End    | 3000 m/z   | Set Collision Cell RF | 130.0 Vpp | Set Divert Valve | Waste     |

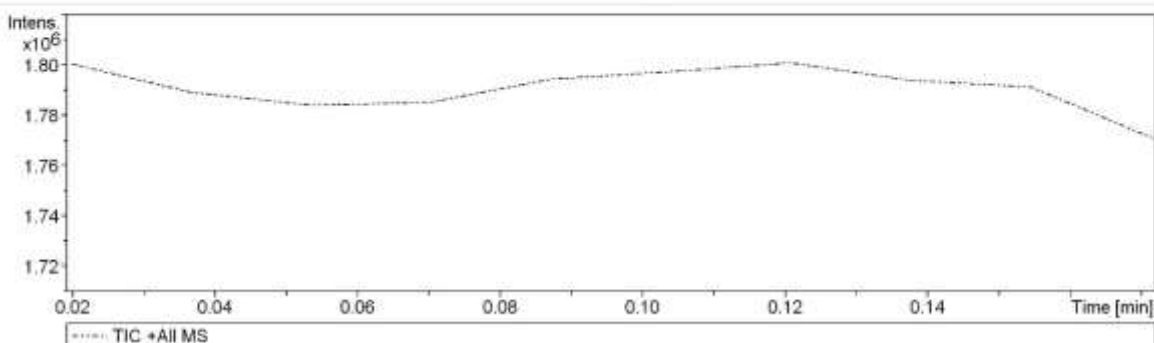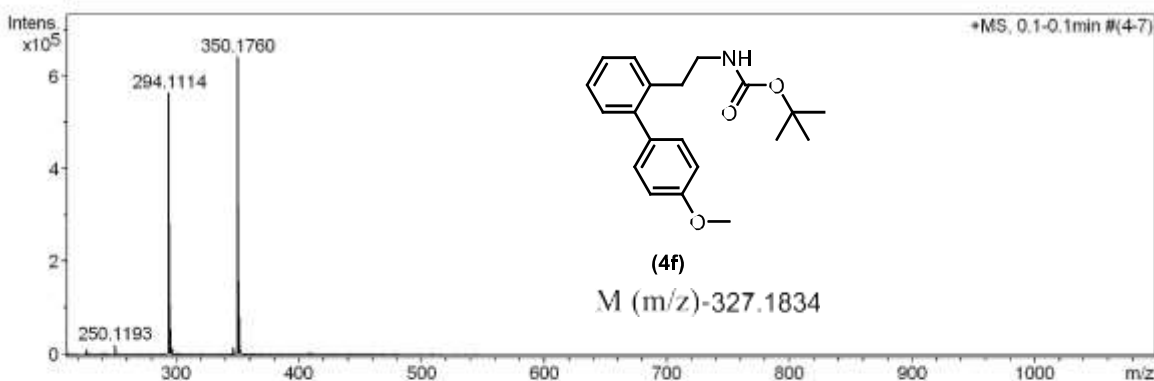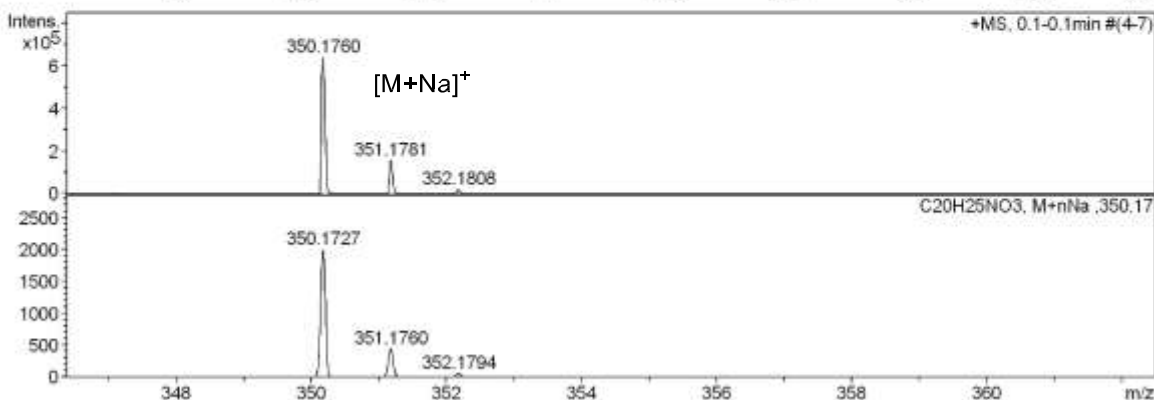

Fig. S38 ESI-HRMS Spectra of compound 4f.

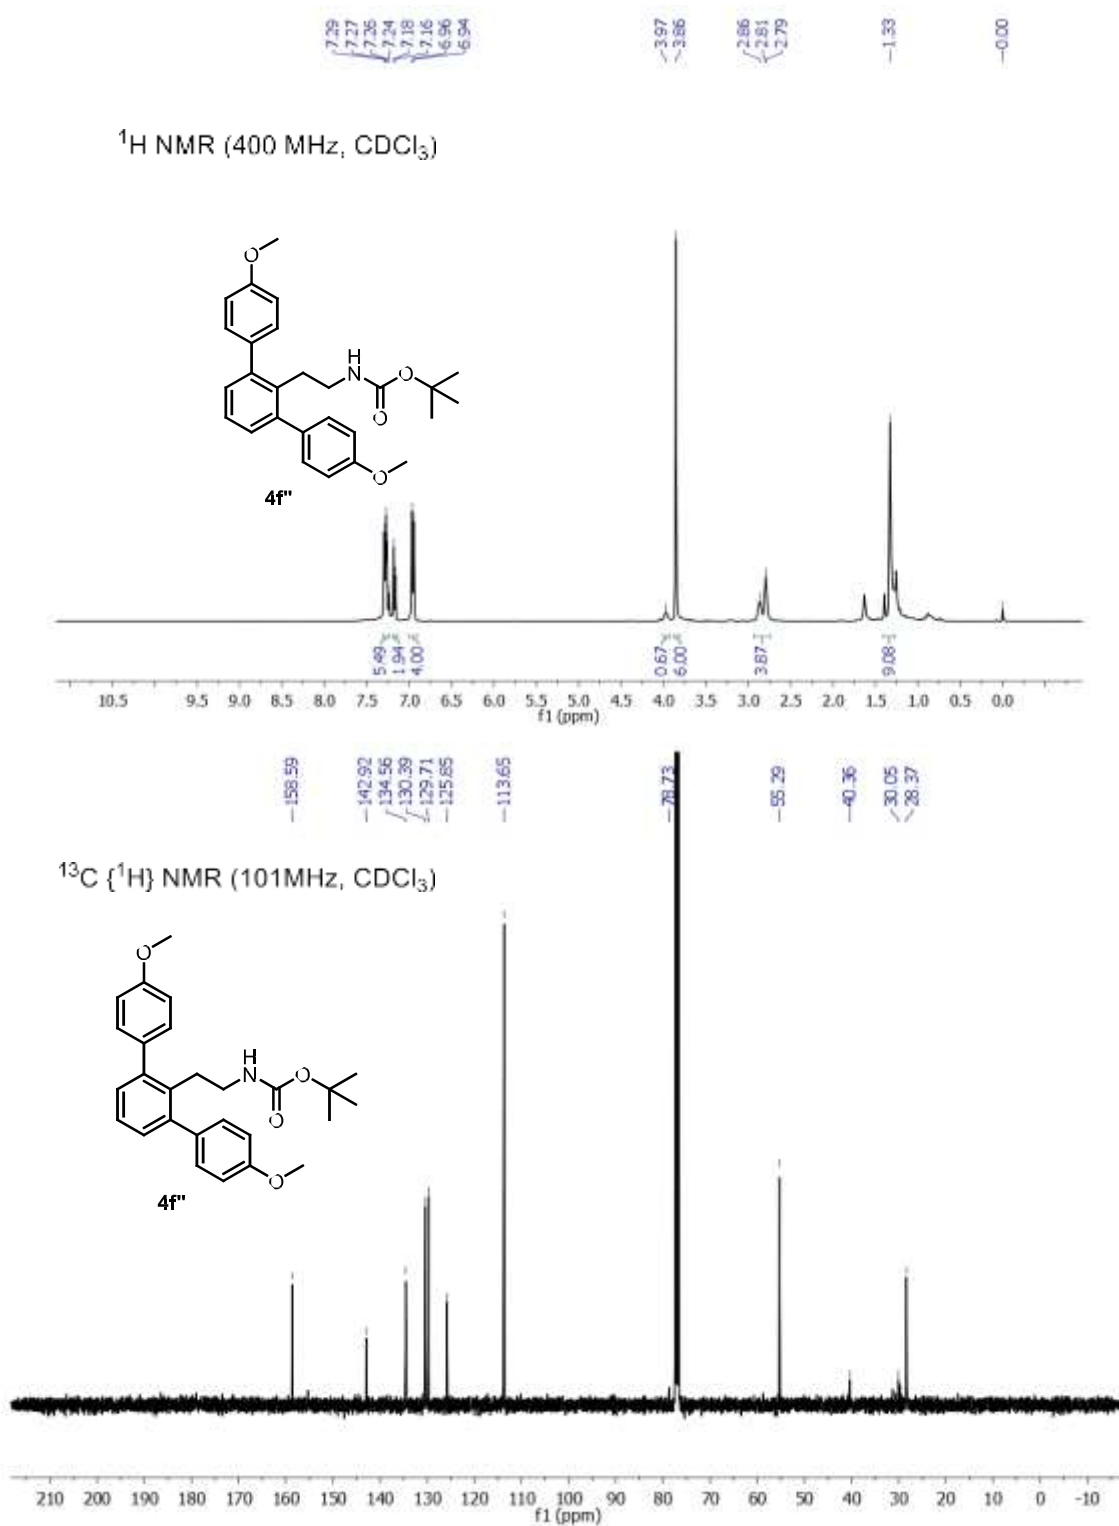

**Fig. S39** <sup>1</sup>H, <sup>13</sup>C {<sup>1</sup>H}, NMR Spectra of compound **4f''**.

## Display Report

### Analysis Info

Analysis Name D:\Data\APR-2022\NKS\23042022\_NKS\_SSDP-318 S2.d  
Method Pos\_tune\_low\_05122019.m  
Sample Name Tmix-131118  
Comment

Acquisition Date 4/23/2022 8:39:07 PM

Operator PRAKASH BEHERA  
Instrument micrOTOF-Q II 10337

### Acquisition Parameter

|             |            |                       |           |                  |           |
|-------------|------------|-----------------------|-----------|------------------|-----------|
| Source Type | ESI        | Ion Polarity          | Positive  | Set Nebulizer    | 0.5 Bar   |
| Focus       | Not active | Set Capillary         | 4500 V    | Set Dry Heater   | 180 °C    |
| Scan Begin  | 50 m/z     | Set End Plate Offset  | -500 V    | Set Dry Gas      | 4.0 l/min |
| Scan End    | 3000 m/z   | Set Collision Cell RF | 130.0 Vpp | Set Divert Valve | Waste     |

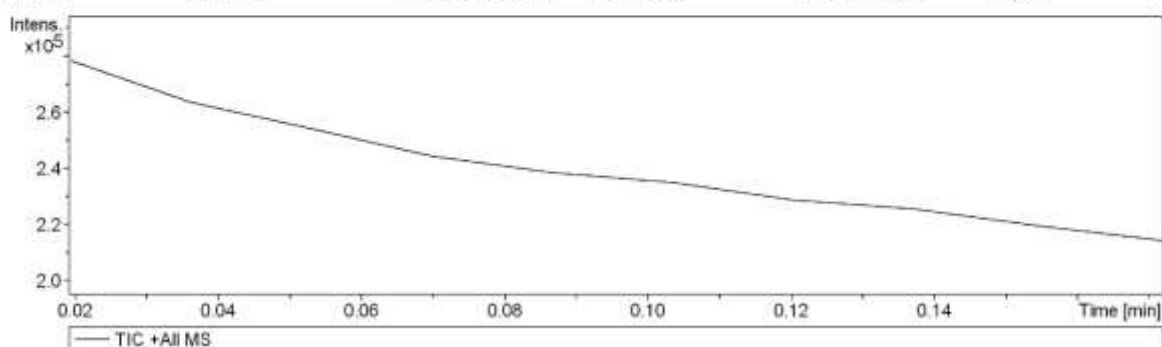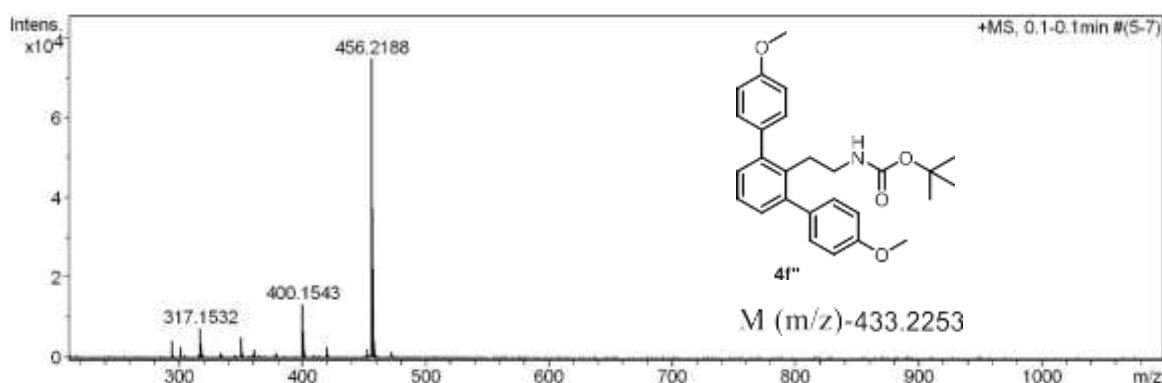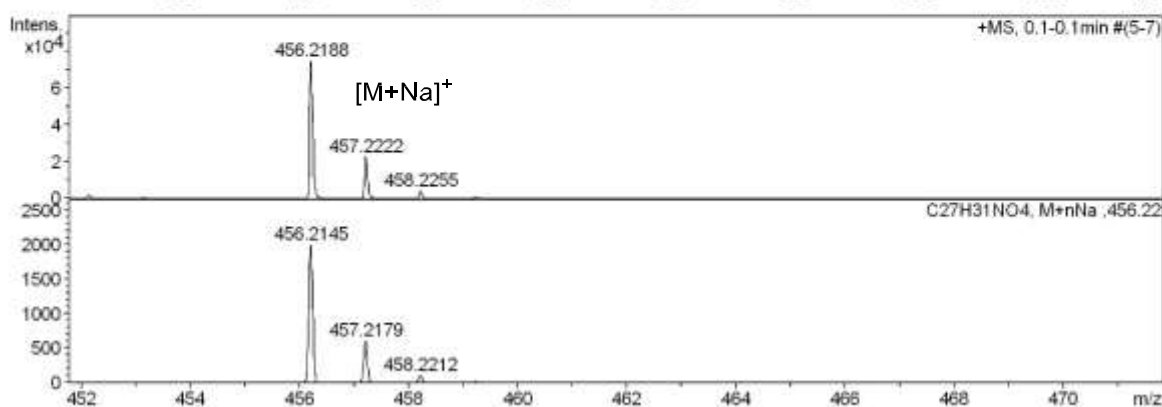

Fig. S40 ESI-HRMS Spectra of compound 4f''.

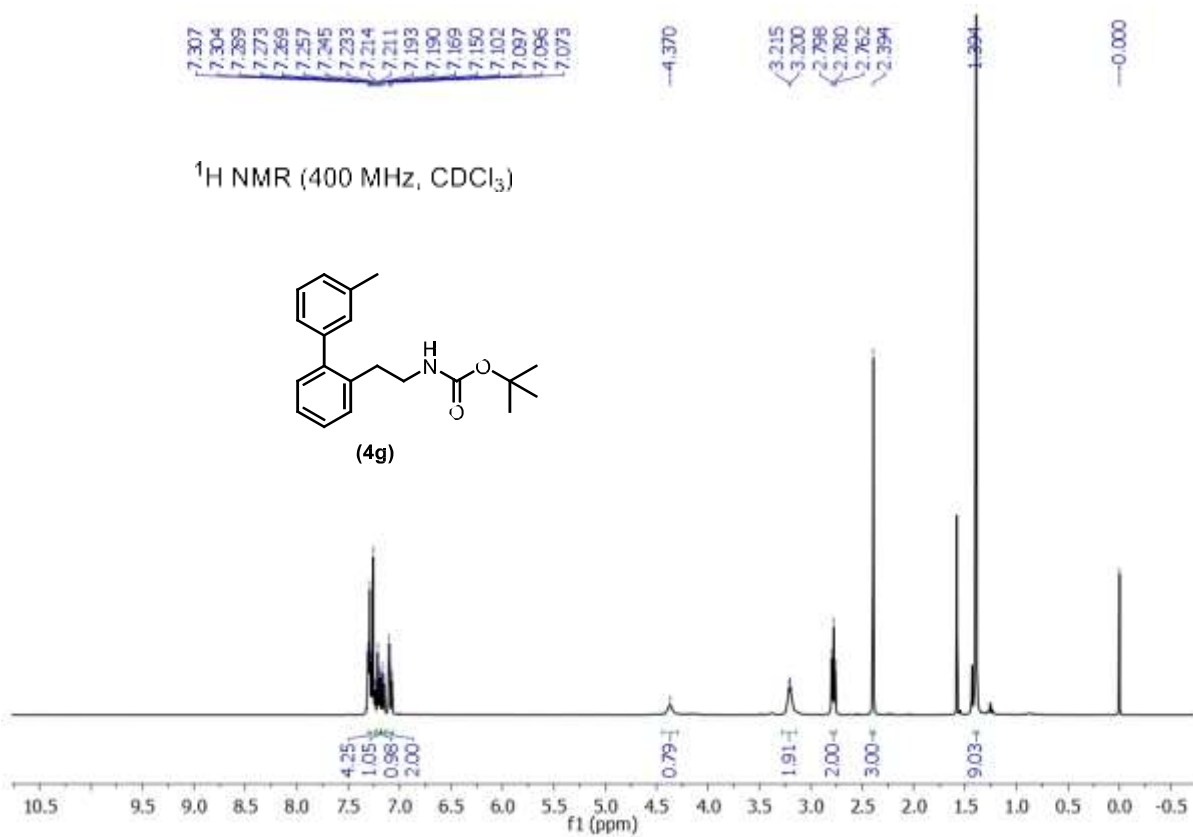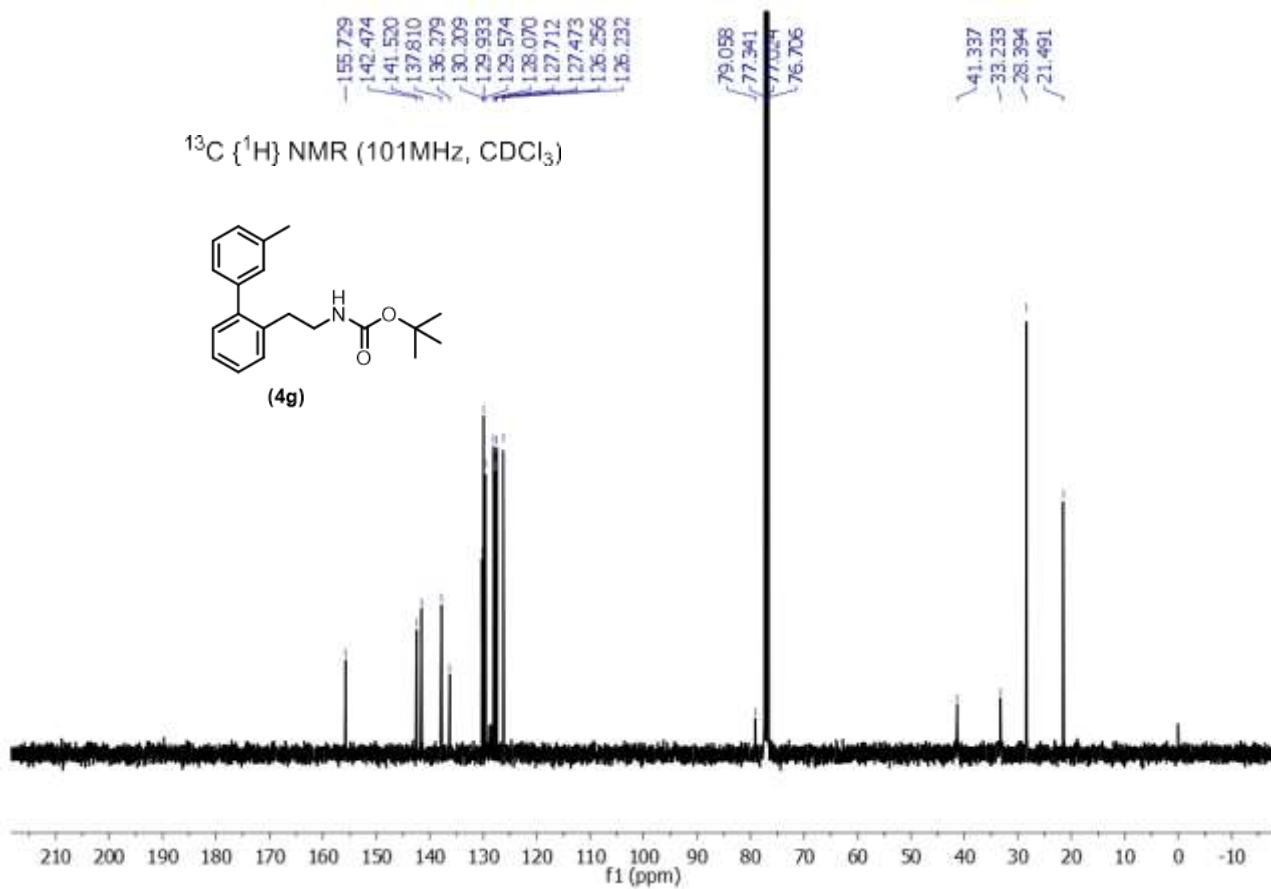

**Fig. S41** <sup>1</sup>H, <sup>13</sup>C {<sup>1</sup>H}, NMR Spectra of compound **4g**.

## Display Report

### Analysis Info

Analysis Name D:\Data\APR-2022\NKS\12042022\_NKS\_SSDP-340 S2.d  
Method Pos\_tune\_low.m  
Sample Name Tmix-131118  
Comment

Acquisition Date 4/12/2022 8:18:53 PM

Operator PRAKASH BEHERA  
Instrument micrOTOF-Q II 10337

### Acquisition Parameter

|             |            |                       |           |                  |           |
|-------------|------------|-----------------------|-----------|------------------|-----------|
| Source Type | ESI        | Ion Polarity          | Positive  | Set Nebulzer     | 0.4 Bar   |
| Focus       | Not active | Set Capillary         | 4500 V    | Set Dry Heater   | 180 °C    |
| Scan Begin  | 50 m/z     | Set End Plate Offset  | -500 V    | Set Dry Gas      | 4.0 l/min |
| Scan End    | 3000 m/z   | Set Collision Cell RF | 130.0 Vpp | Set Divert Valve | Waste     |

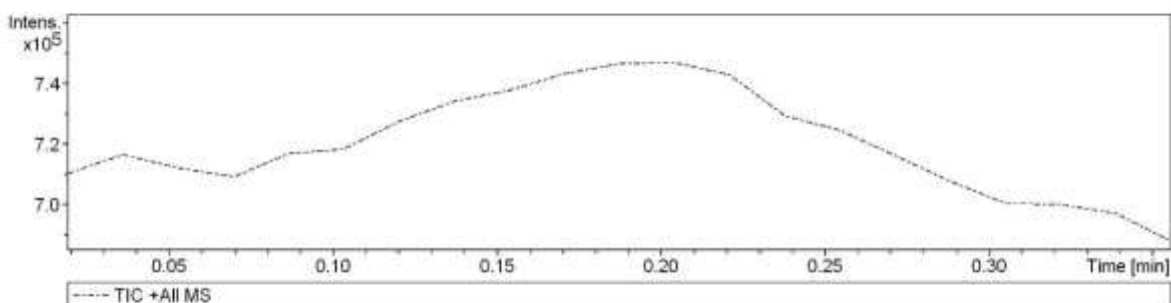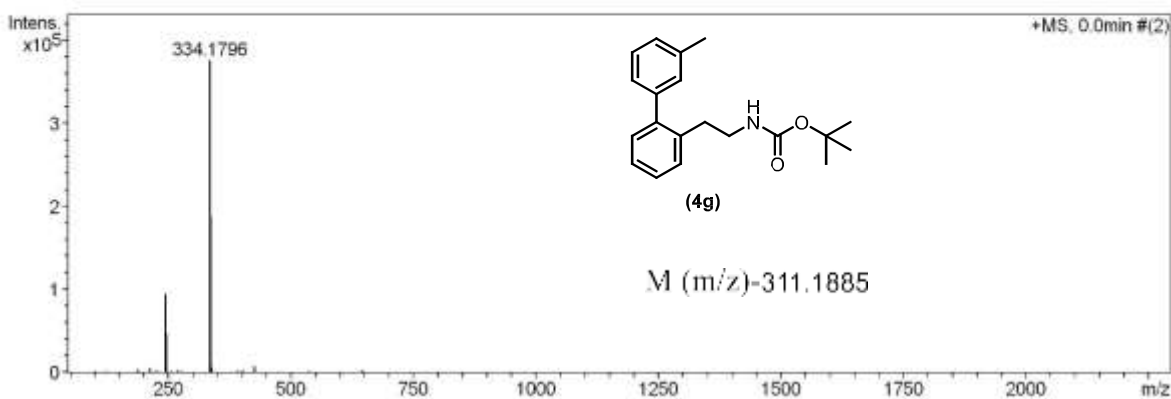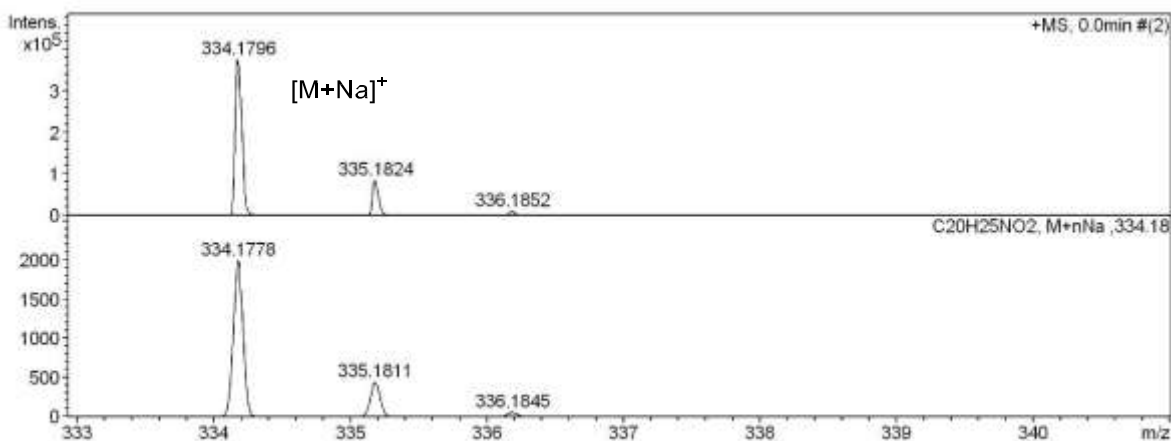

Fig. S42 ESI-HRMS Spectra of compound 4g.

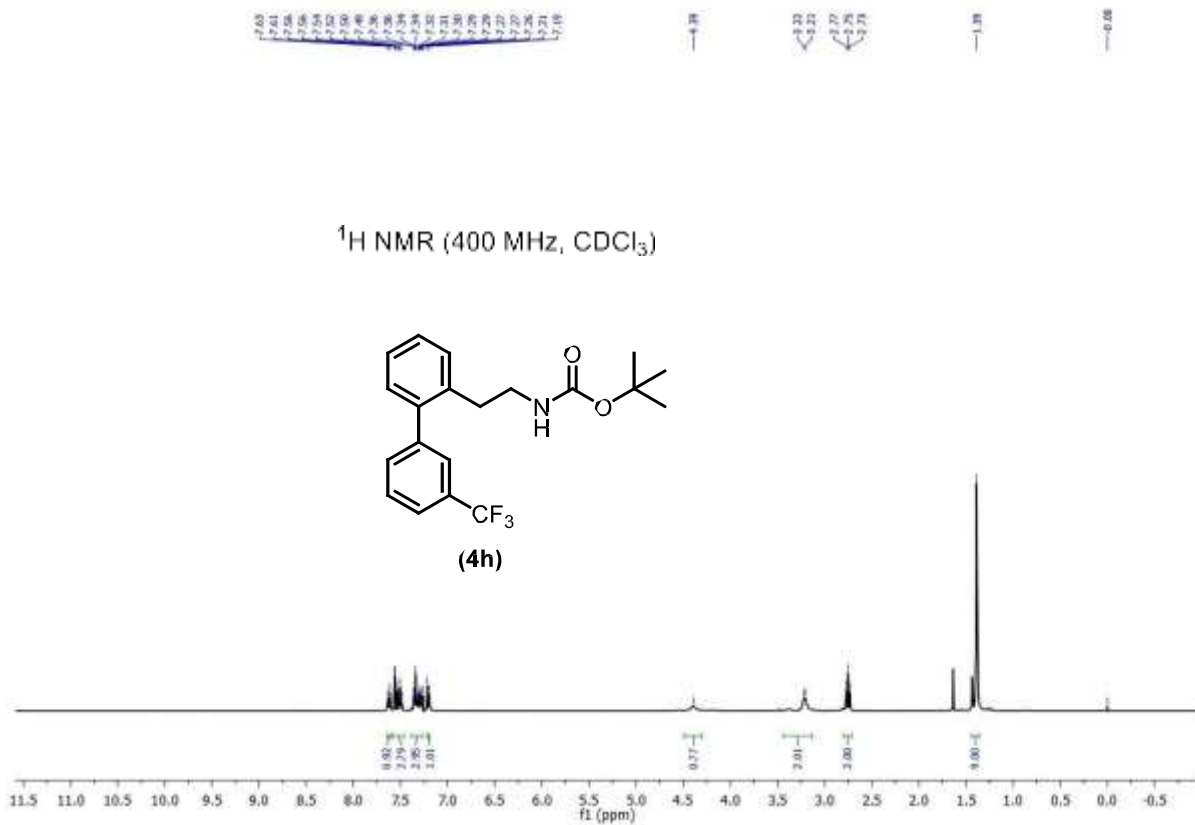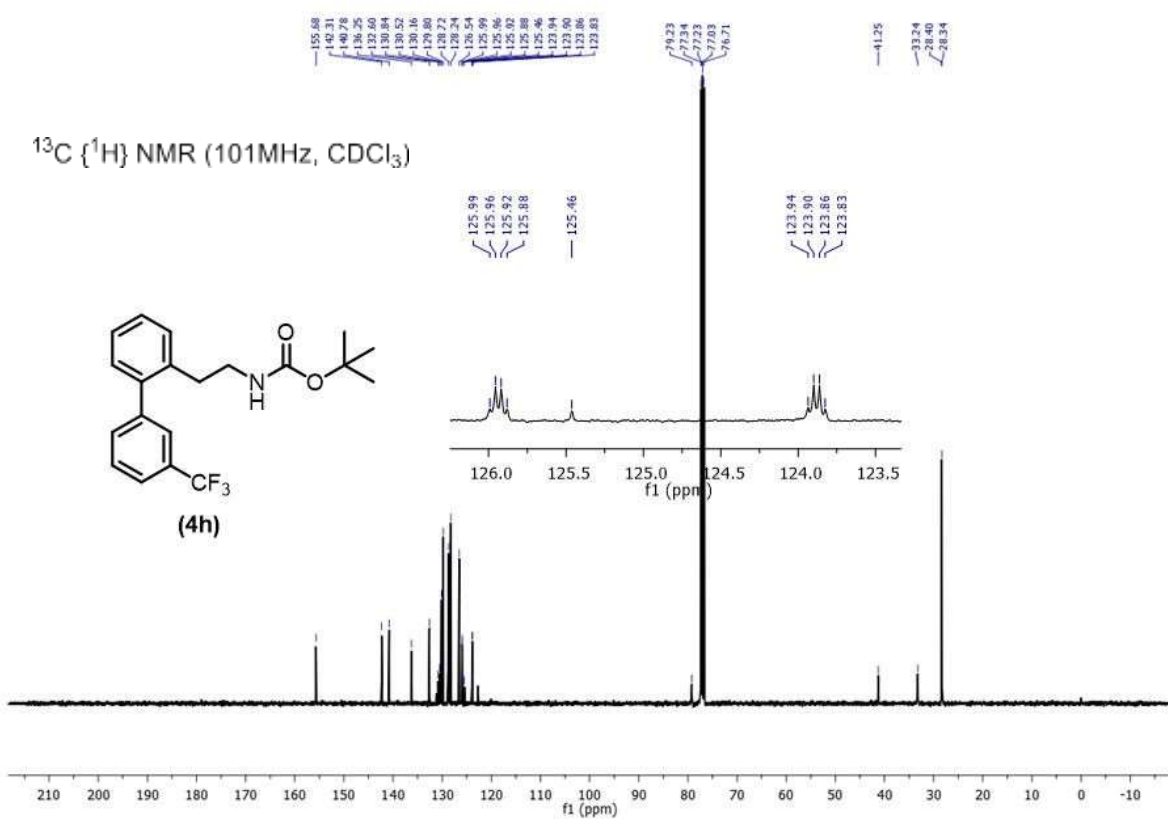

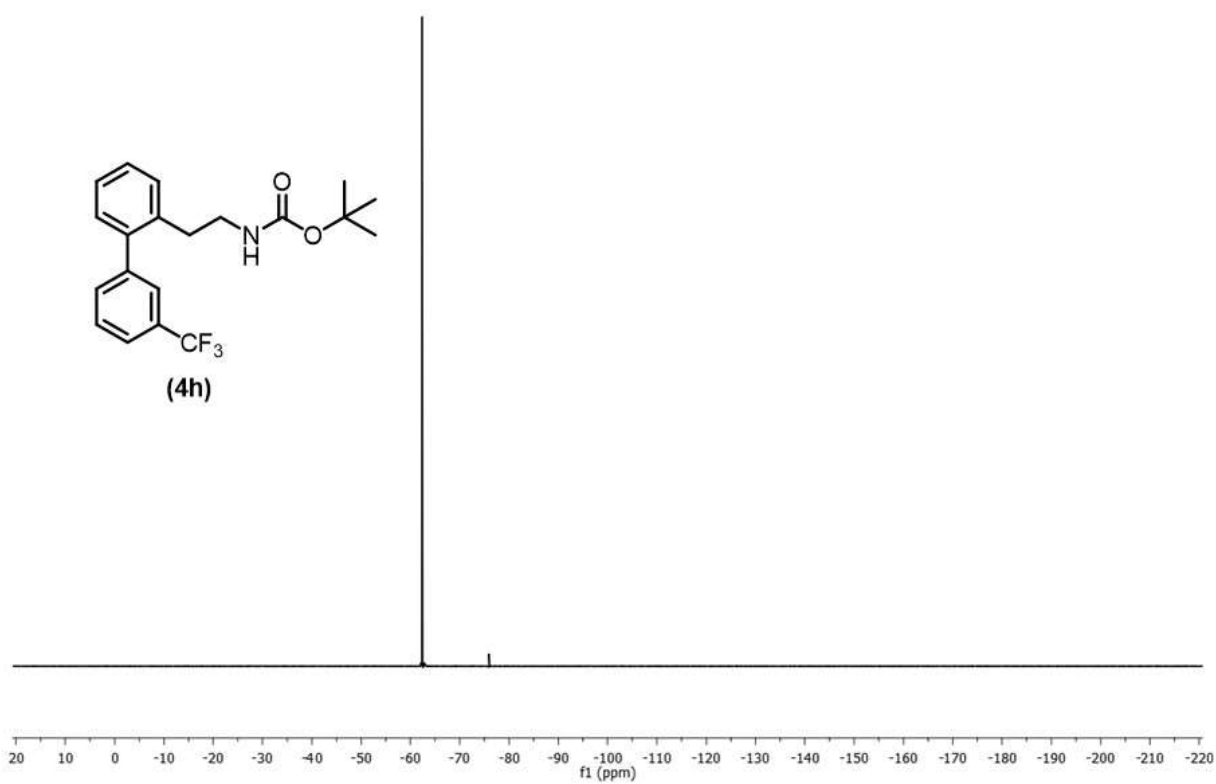

**Fig. S43**  $^1\text{H}$ ,  $^{13}\text{C}$  { $^1\text{H}$ }, and  $^{19}\text{F}$ NMR Spectra of compound **4h**.

NKS\_SSDP\_342

29-Jun-2022

01:16:51

XEVO-G2XSQTOF#YFA1739

NKS\_28062022\_25 (0.053) Cu (0.05); Is (1.00,1.00) C<sub>20</sub>H<sub>22</sub>NO<sub>2</sub>F<sub>3</sub>Na

1: TOF MS ES+  
7.98e12

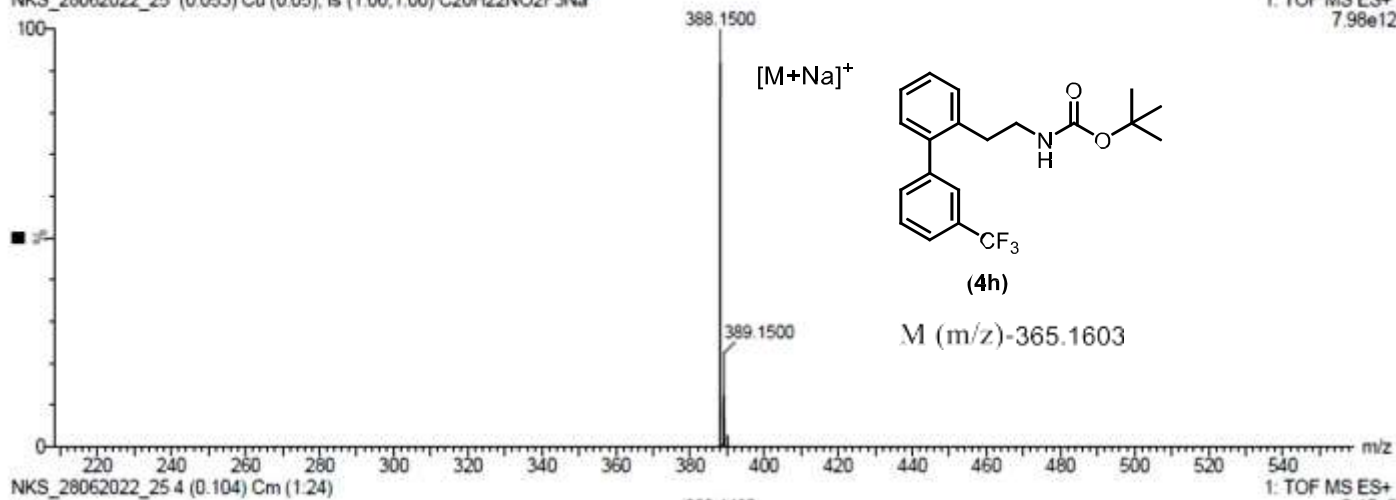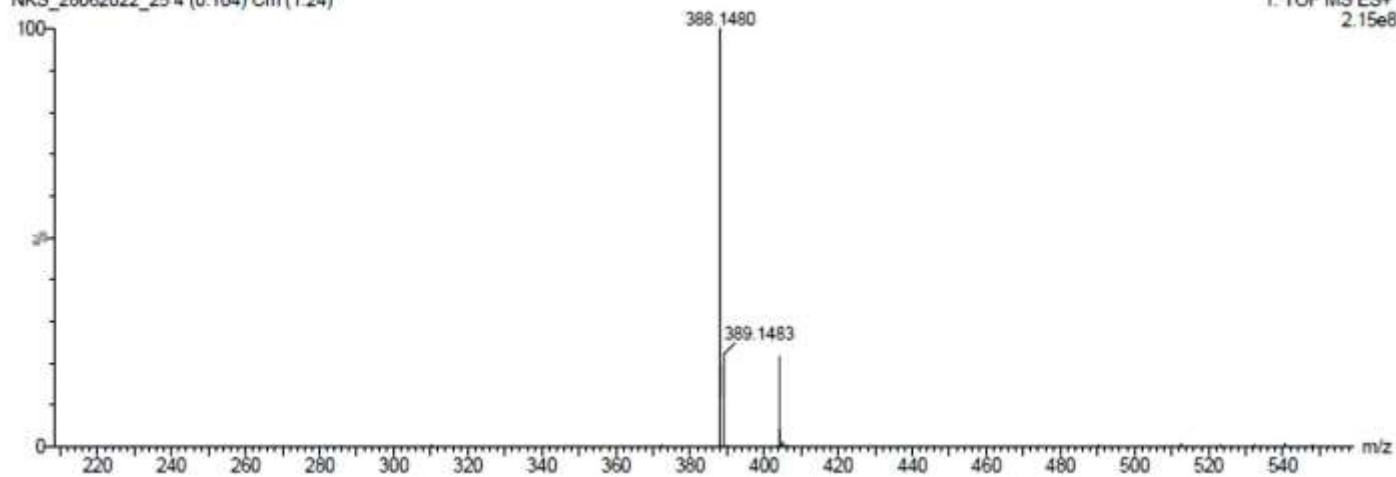

Fig. S44 ESI-HRMS Spectra of compound 4h.



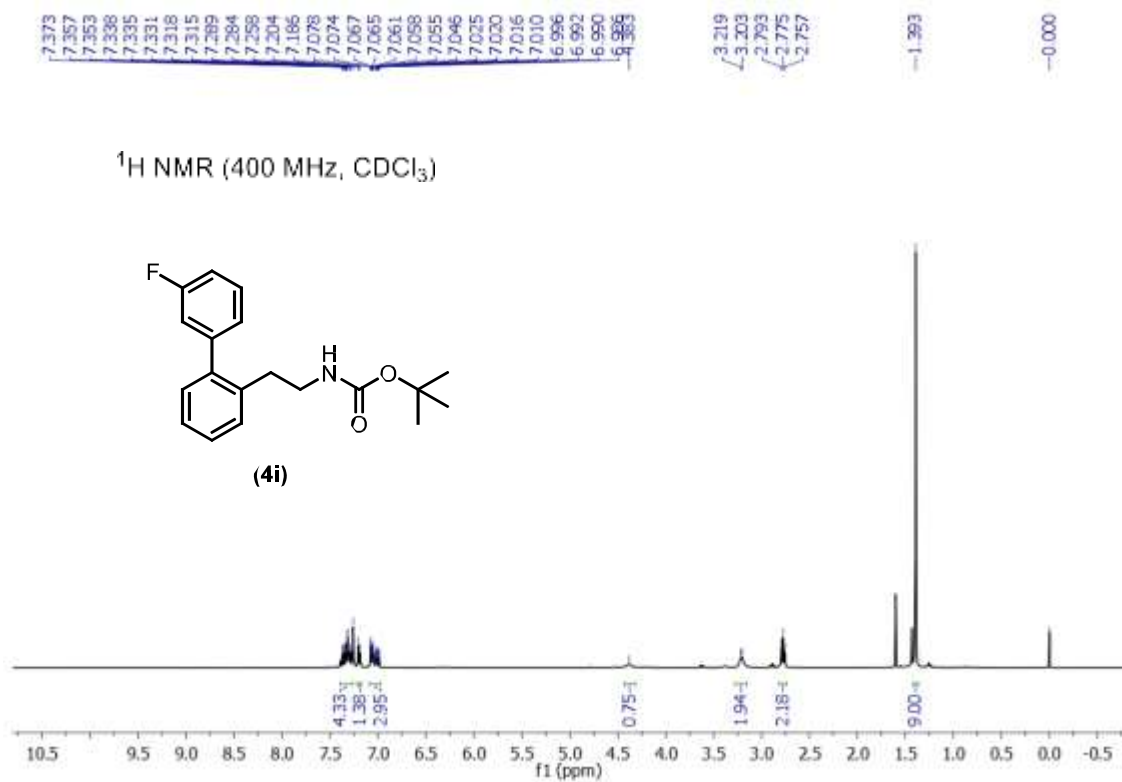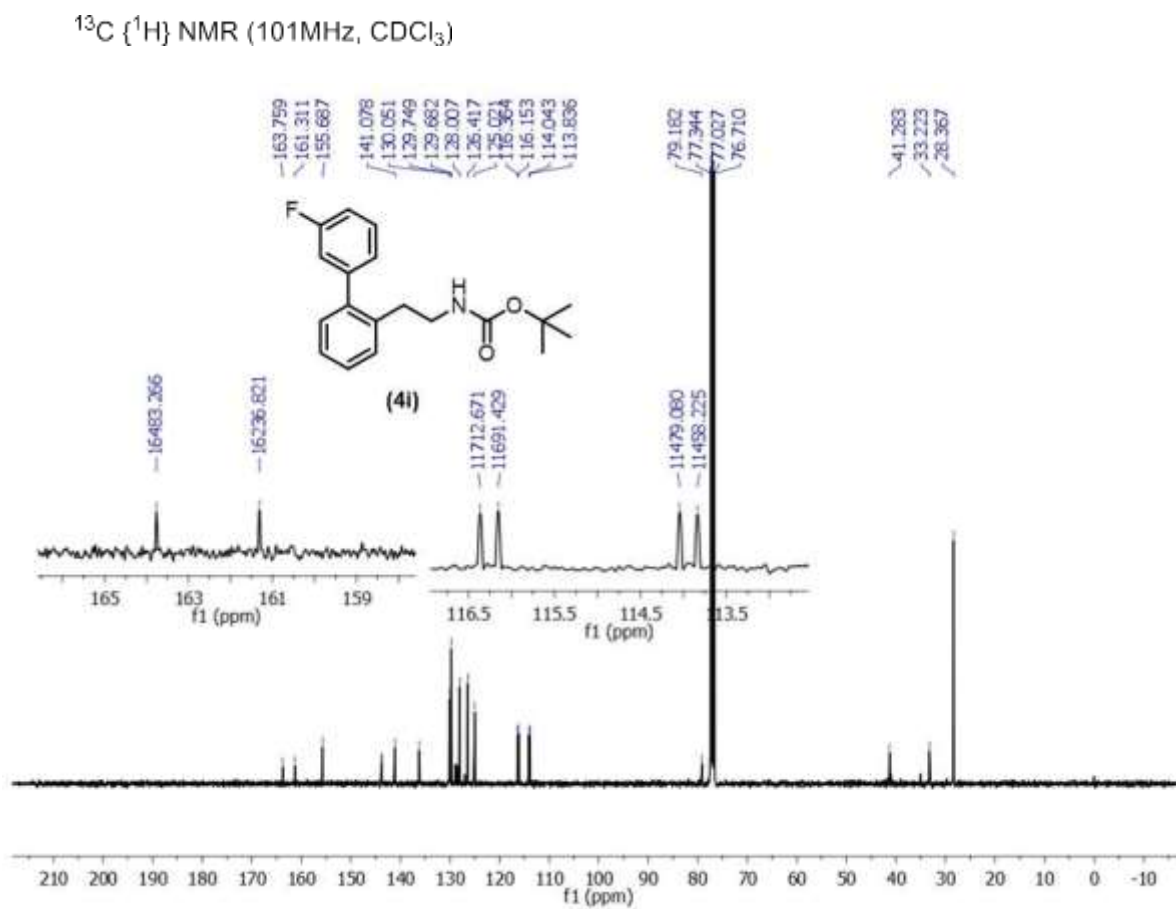

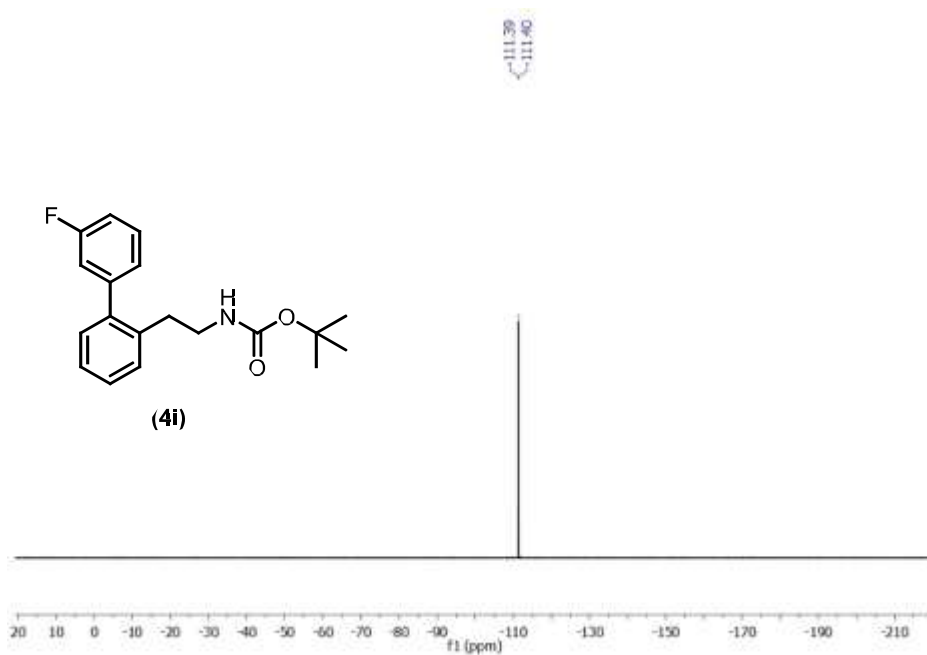

Fig. S45  $^1\text{H}$ ,  $^{13}\text{C}$  { $^1\text{H}$ },  $^{19}\text{F}$  NMR Spectra of compound **4i**.

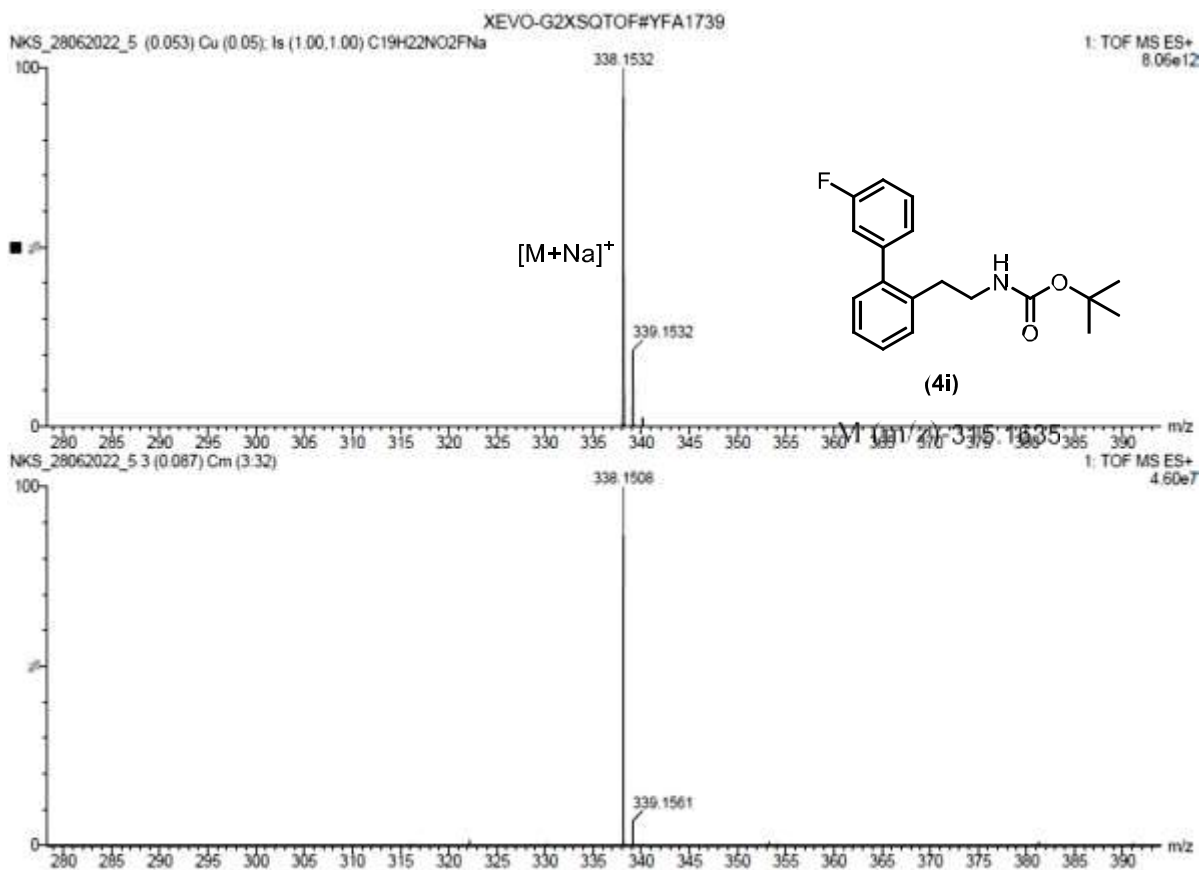

Fig. S46 ESI-HRMS Spectra of compound **4i**.

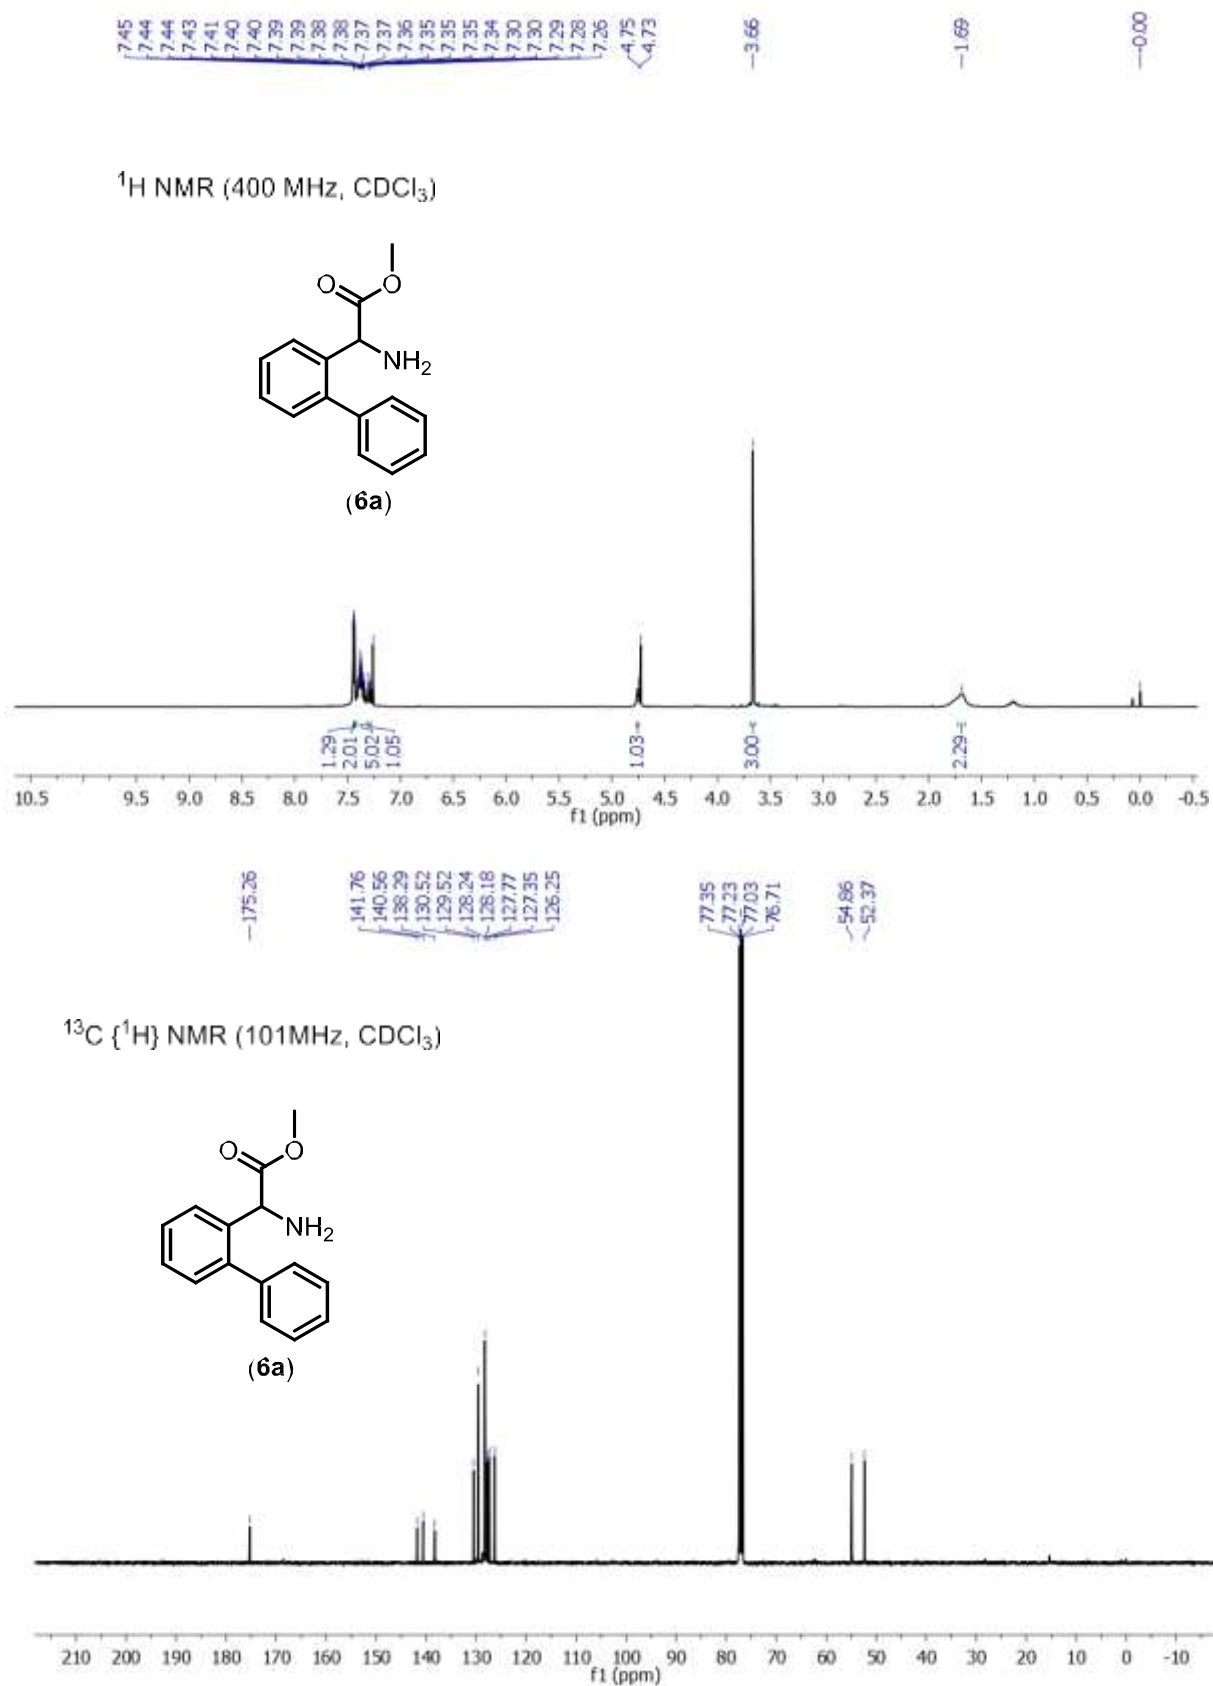

**Fig. S47** <sup>1</sup>H, <sup>13</sup>C {<sup>1</sup>H}, NMR Spectra of compound **6a**.

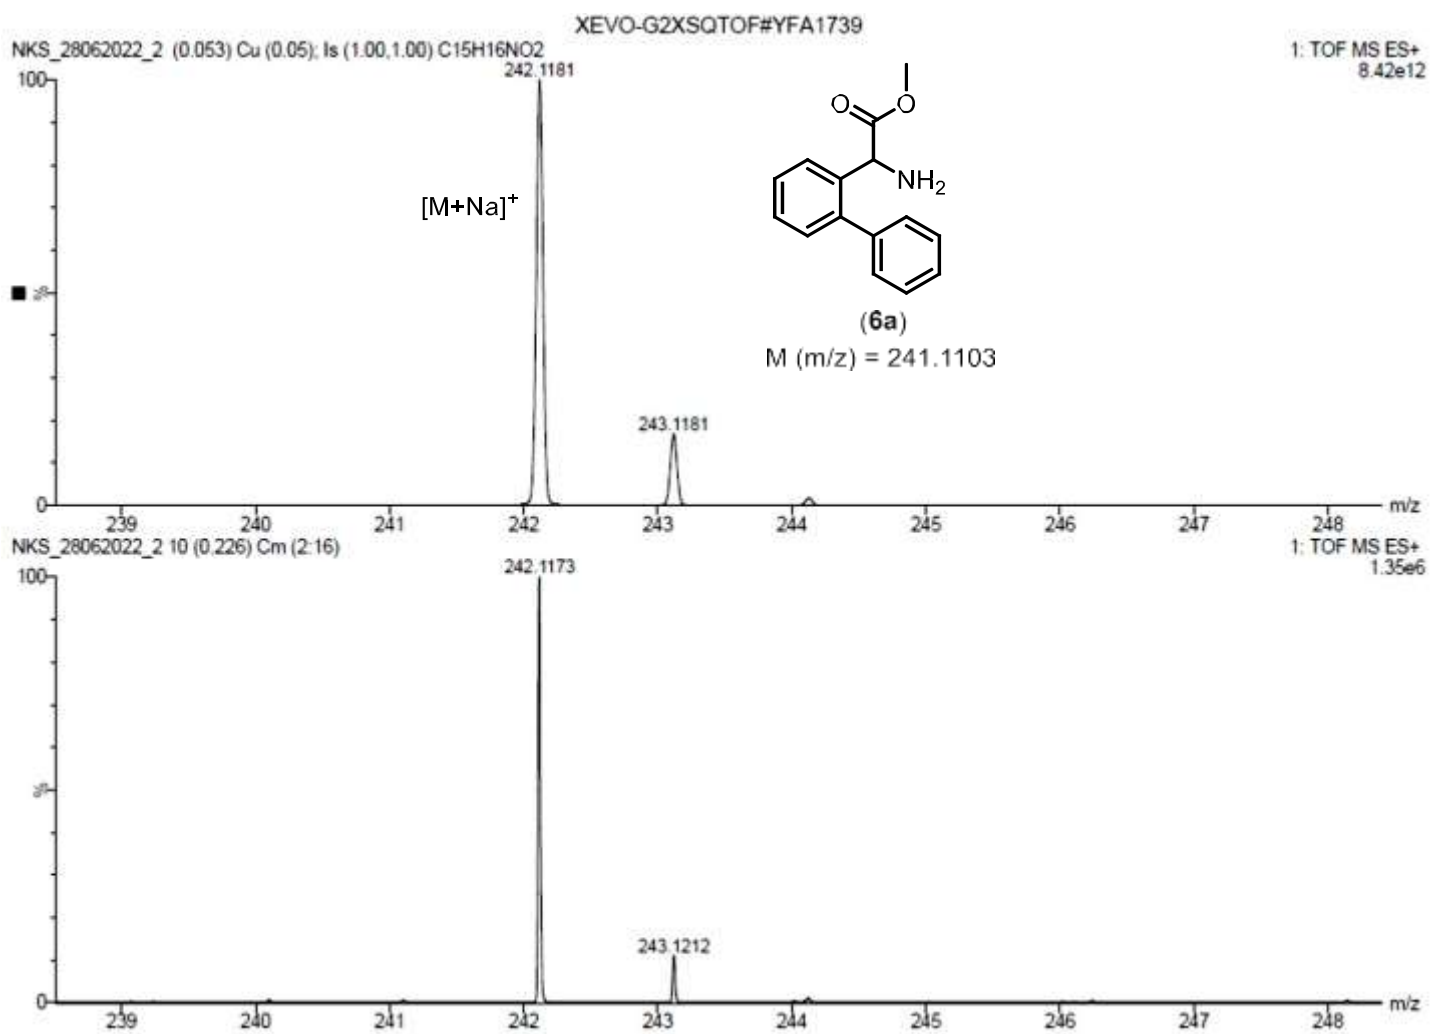

Fig. S48 ESI-HRMS Spectra of compound **6a**.

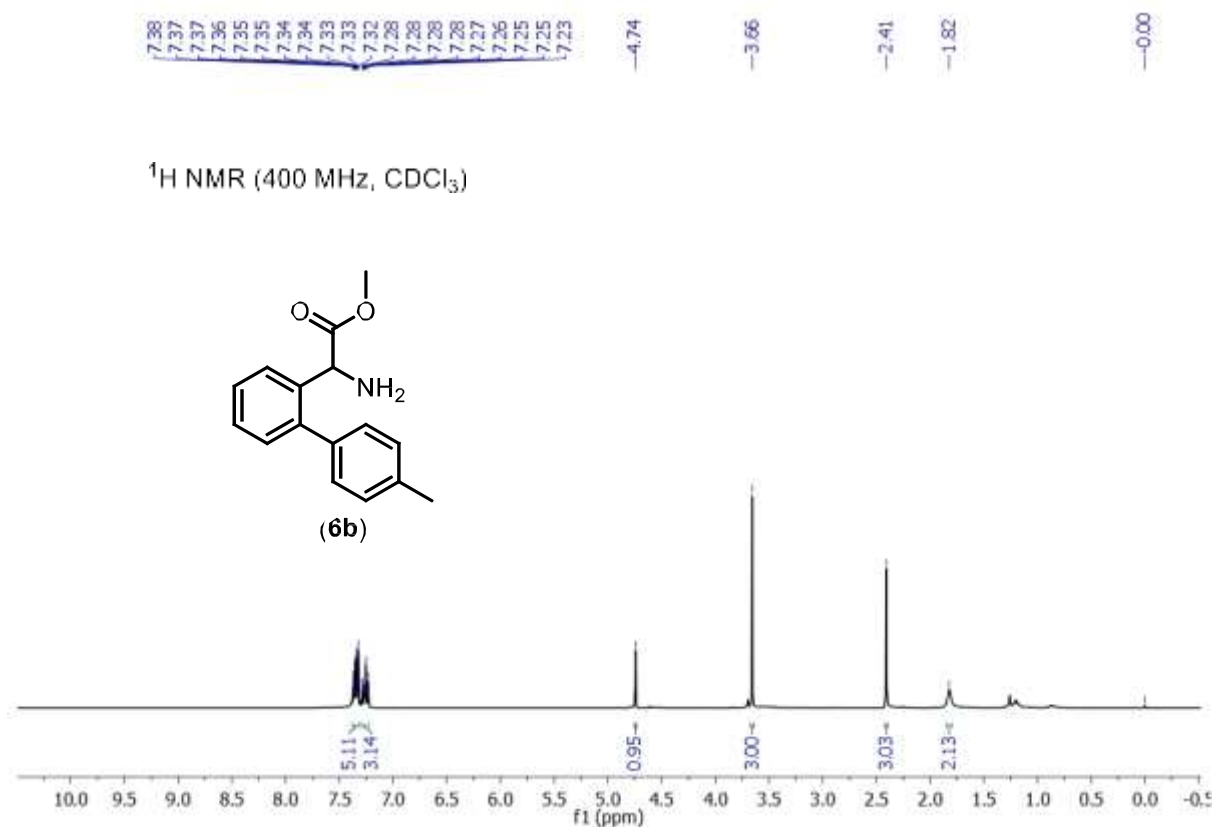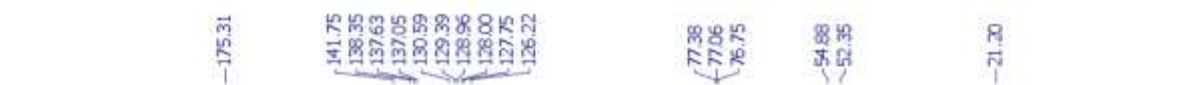

**Fig. S49** <sup>1</sup>H, <sup>13</sup>C {<sup>1</sup>H}, NMR Spectra of compound **6b**.

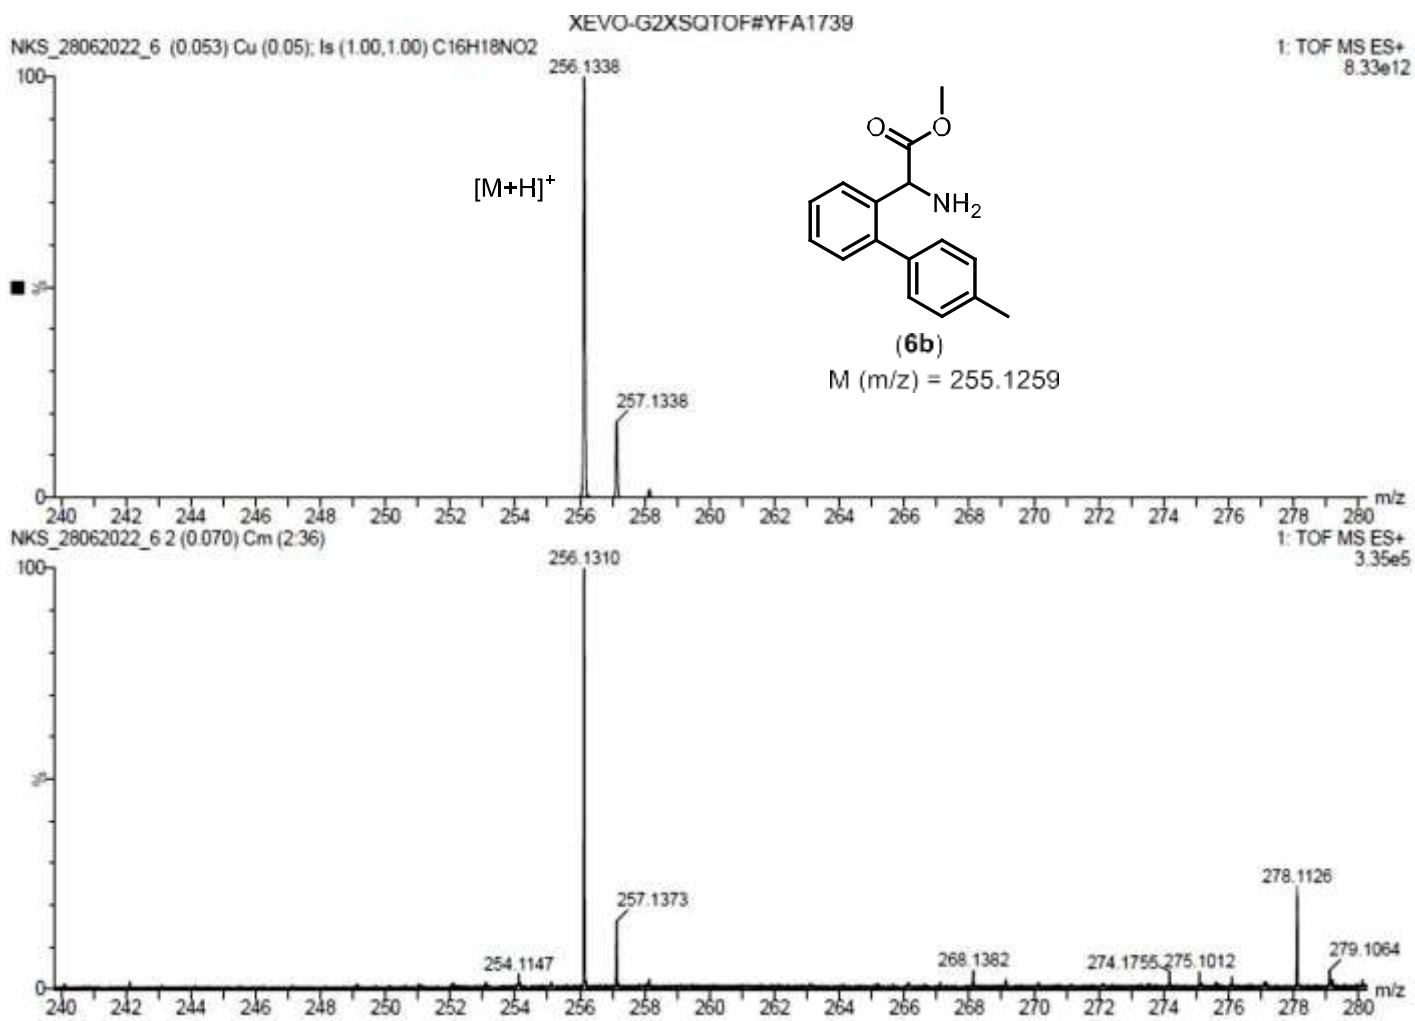

Fig. S50 ESI-HRMS Spectra of compound **6b**.

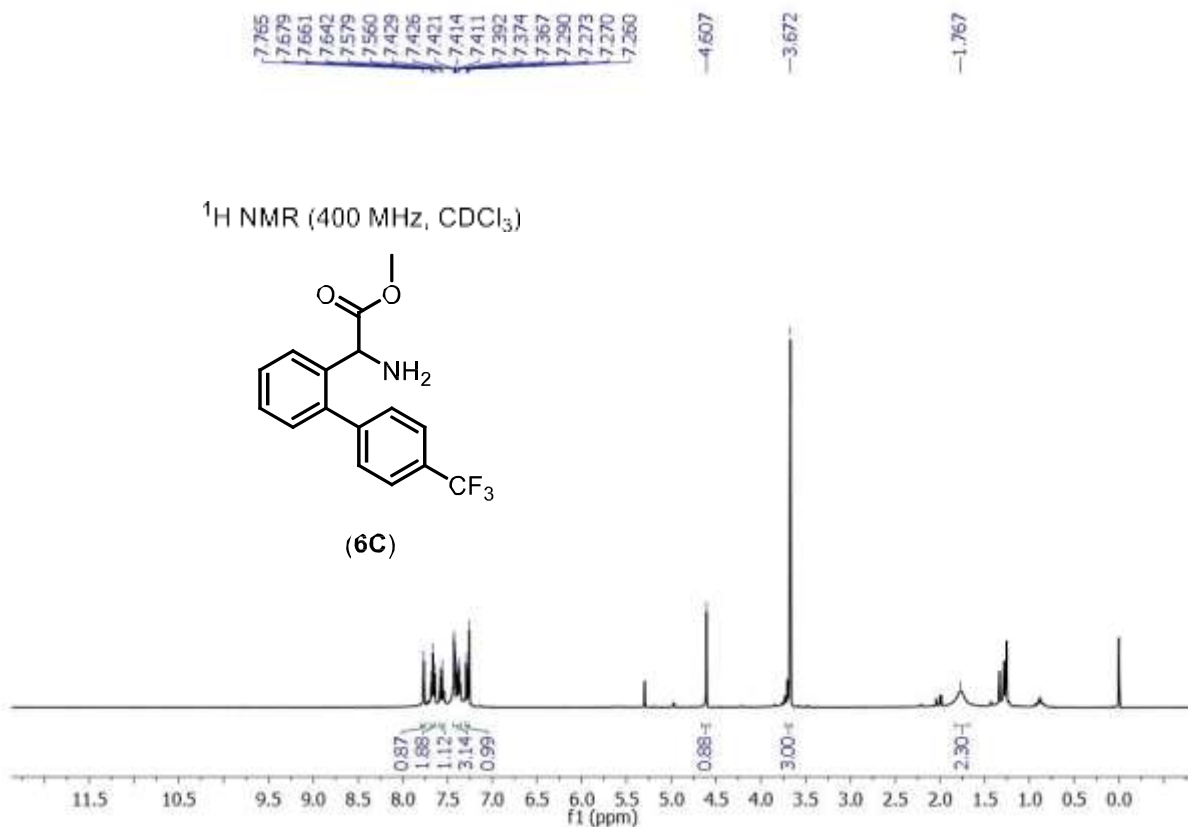

<sup>13</sup>C {<sup>1</sup>H} NMR (101MHz, CDCl<sub>3</sub>)

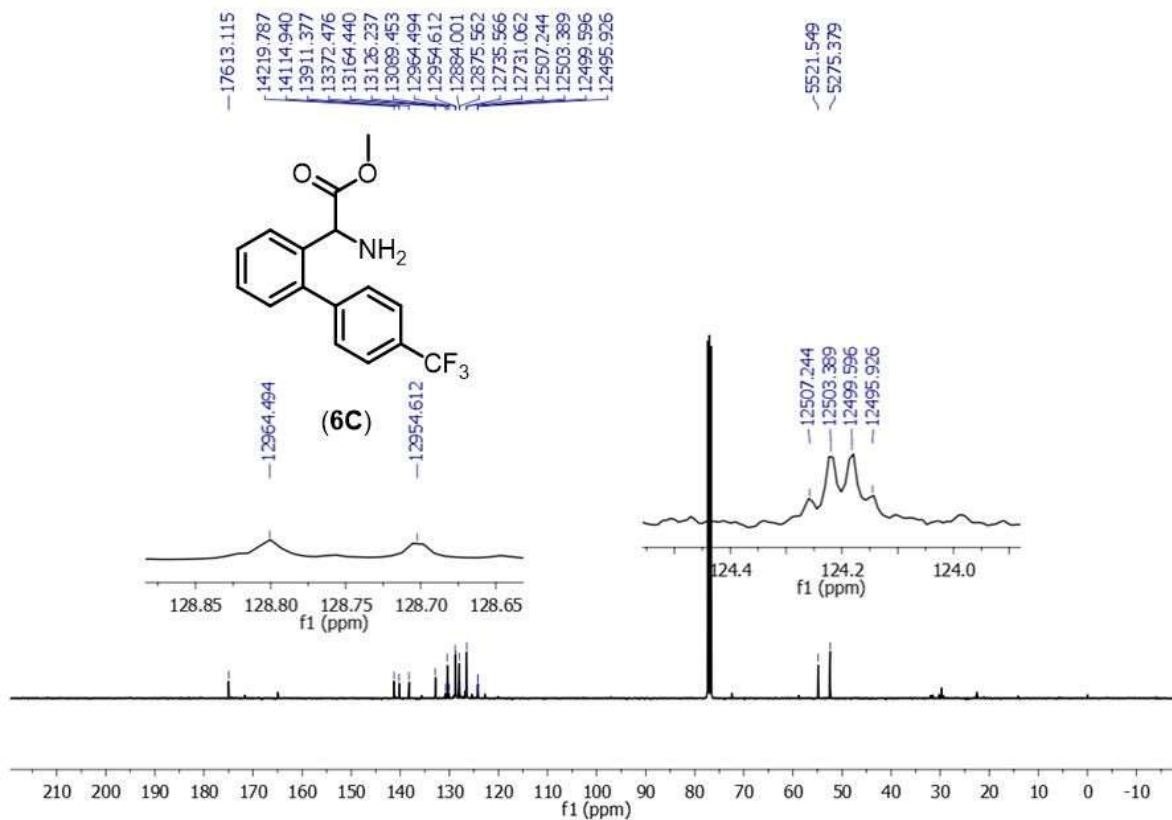

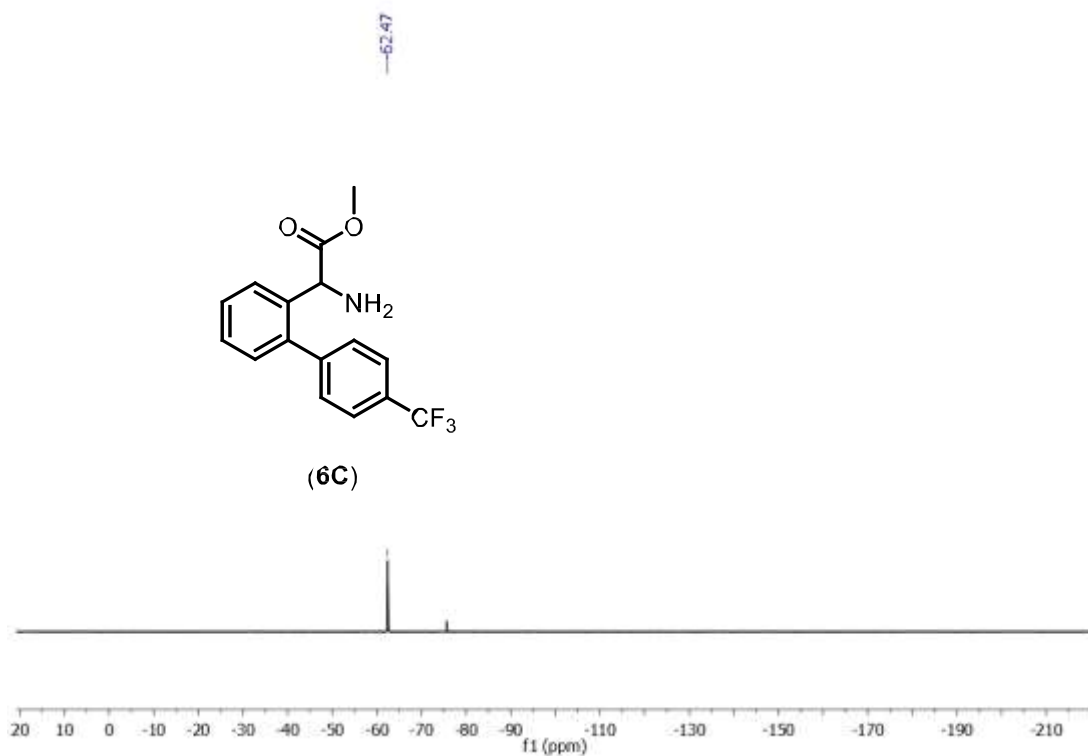

**Fig. S51**  $^1\text{H}$ ,  $^{13}\text{C}$  { $^1\text{H}$ },  $^{19}\text{F}$  NMR Spectra of compound **6c**.

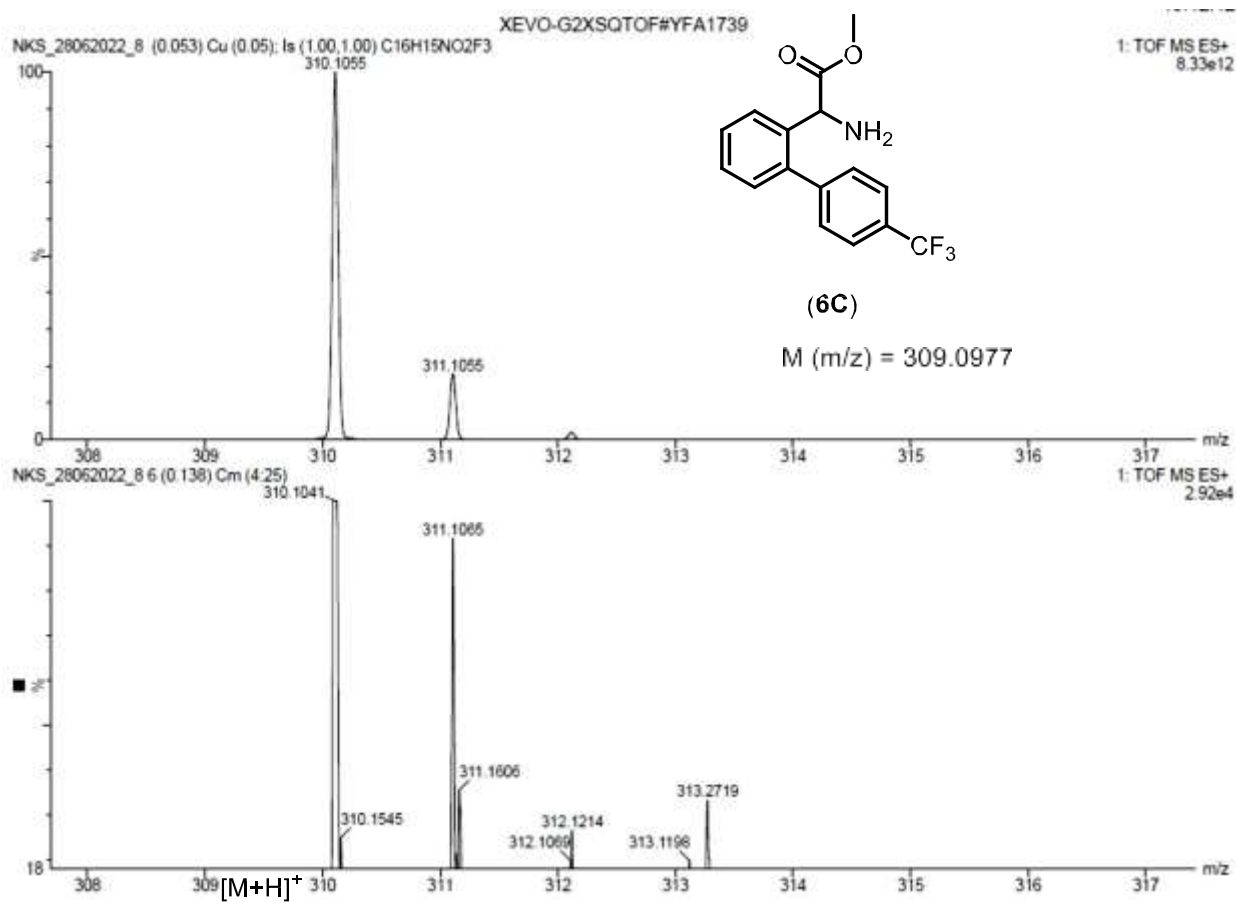

**Fig.S52** ESI-HRMS Spectra of compound **6c**.



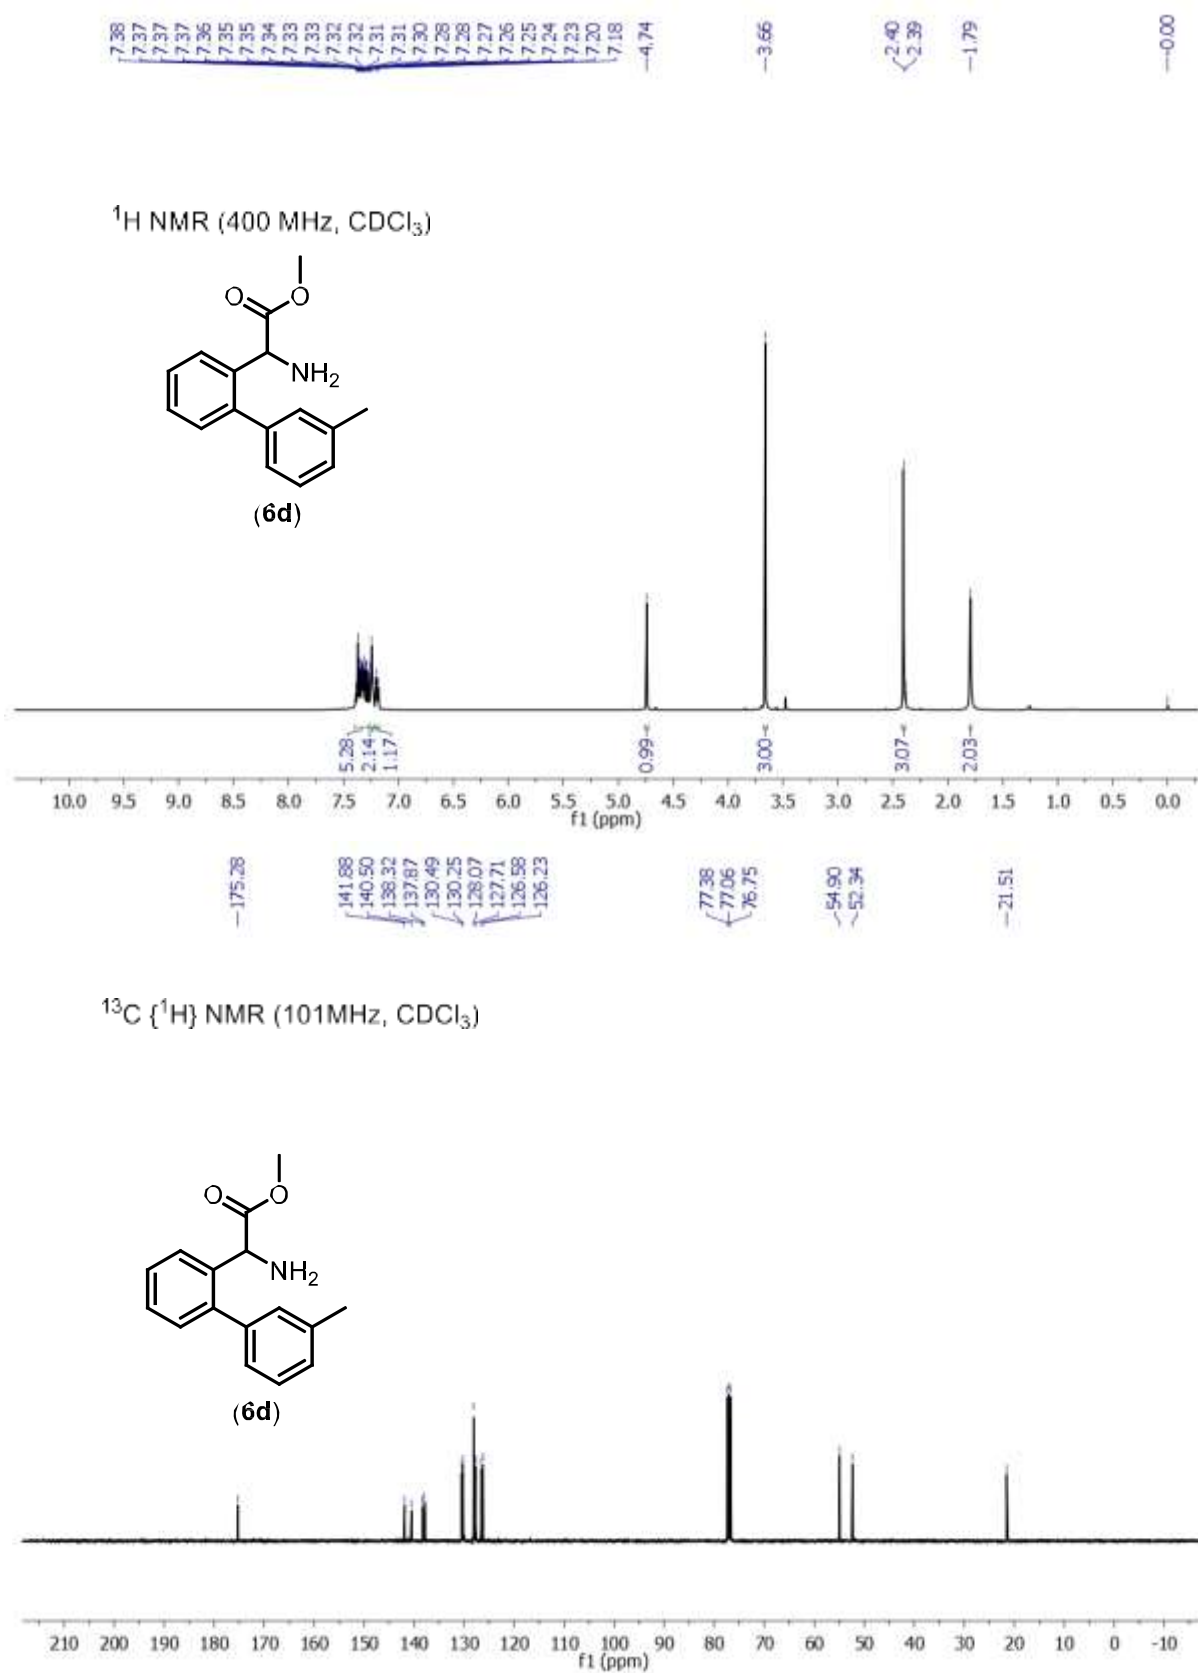

**Fig. S53** <sup>1</sup>H, <sup>13</sup>C {<sup>1</sup>H}, NMR Spectra of compound **6d**.

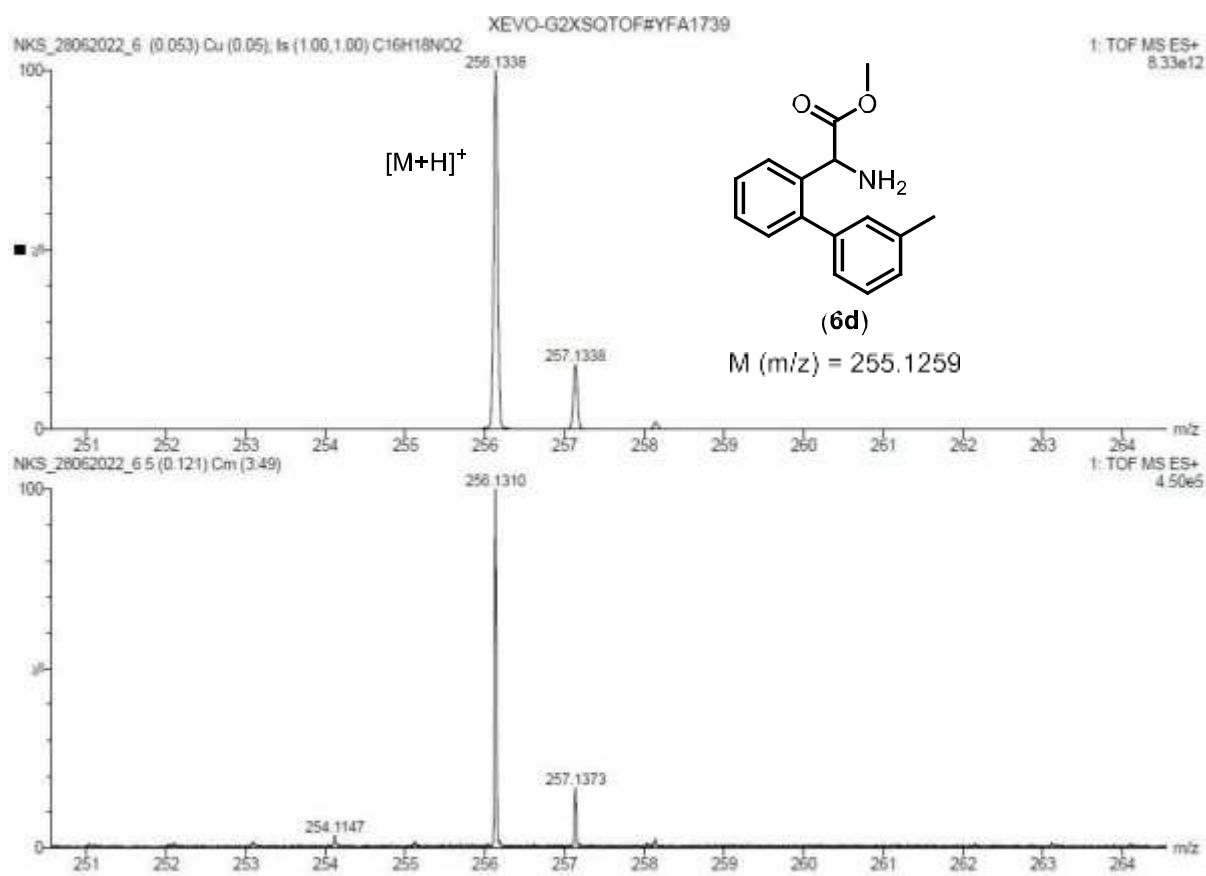

Fig. S54 ESI-HRMS Spectra of compound **6d**.

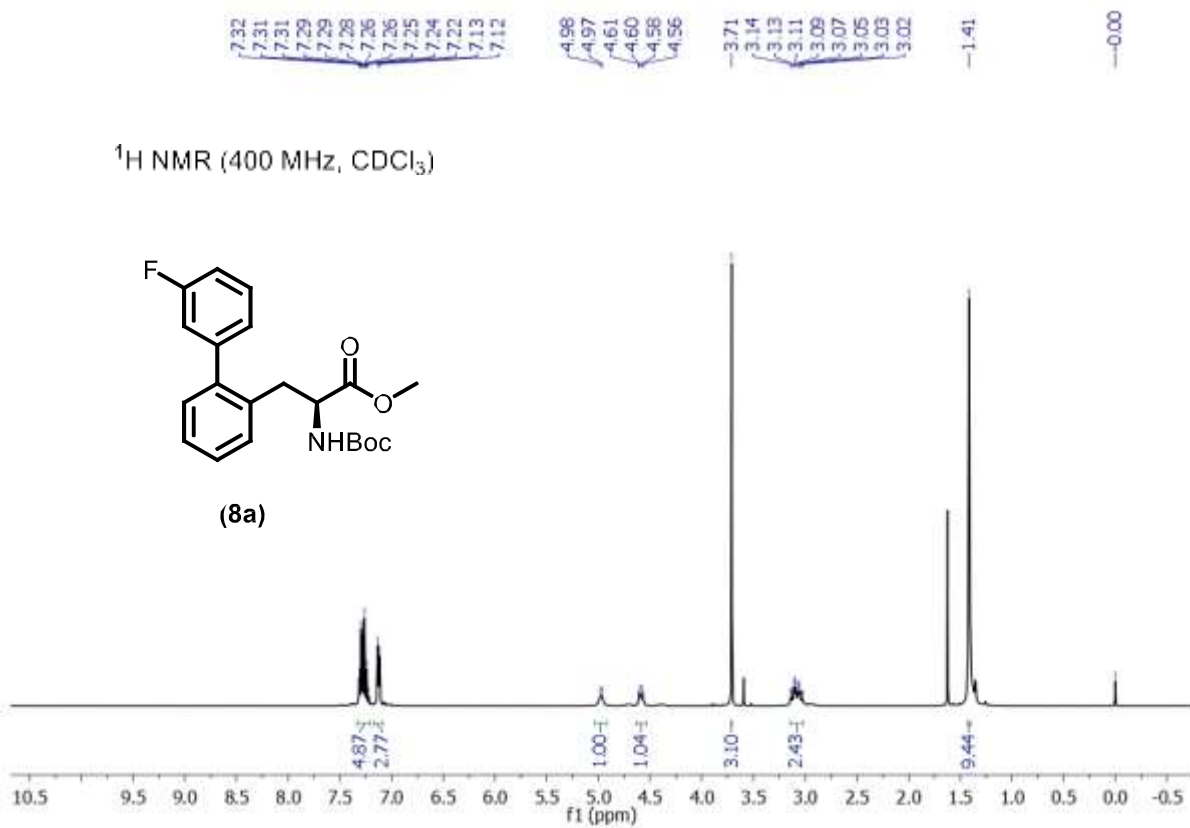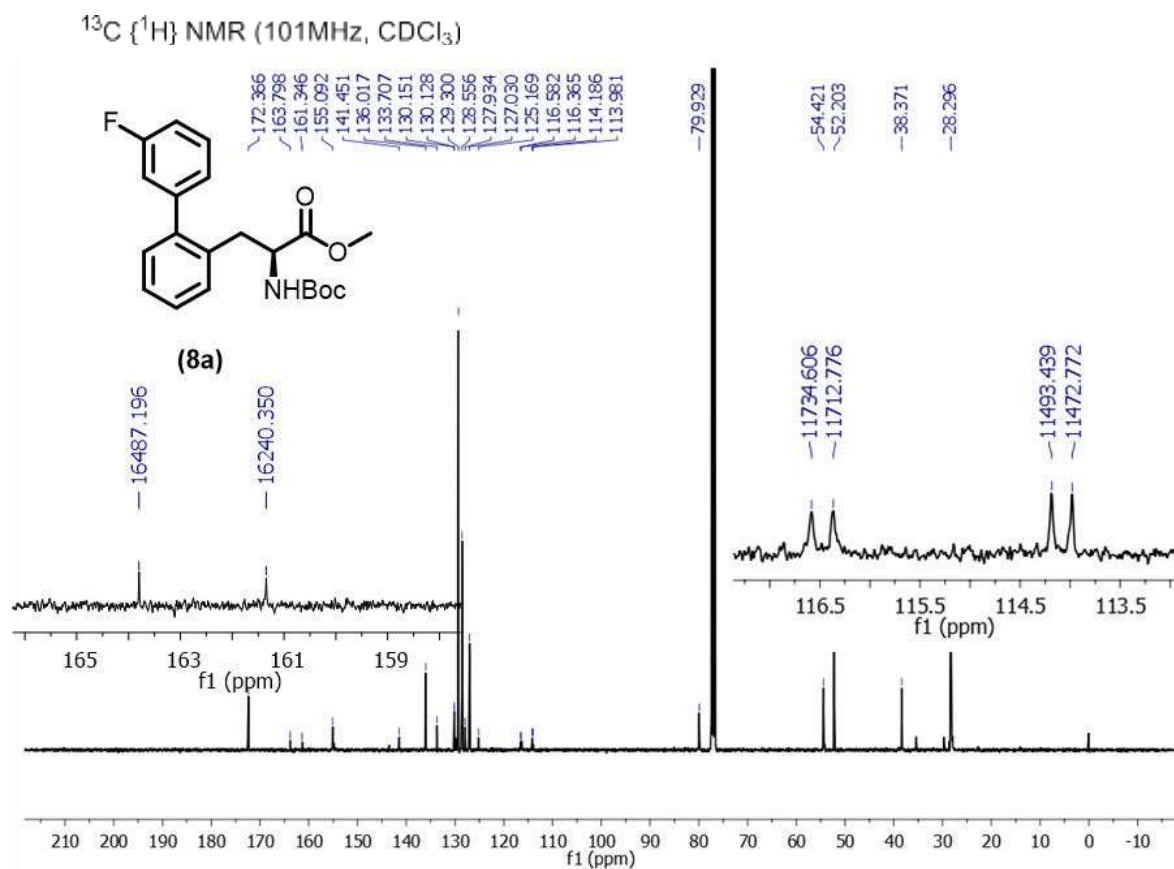

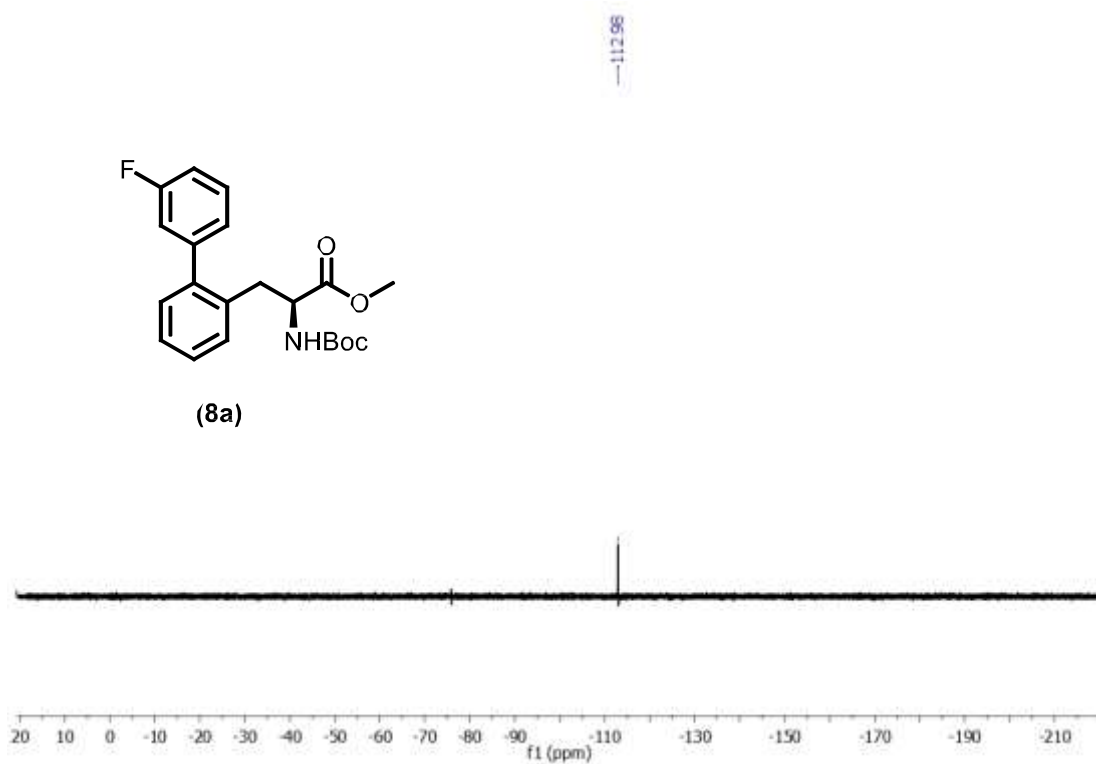

**Fig. S55**  $^1\text{H}$ ,  $^{13}\text{C}$  { $^1\text{H}$ }, NMR Spectra of compound **8a**.

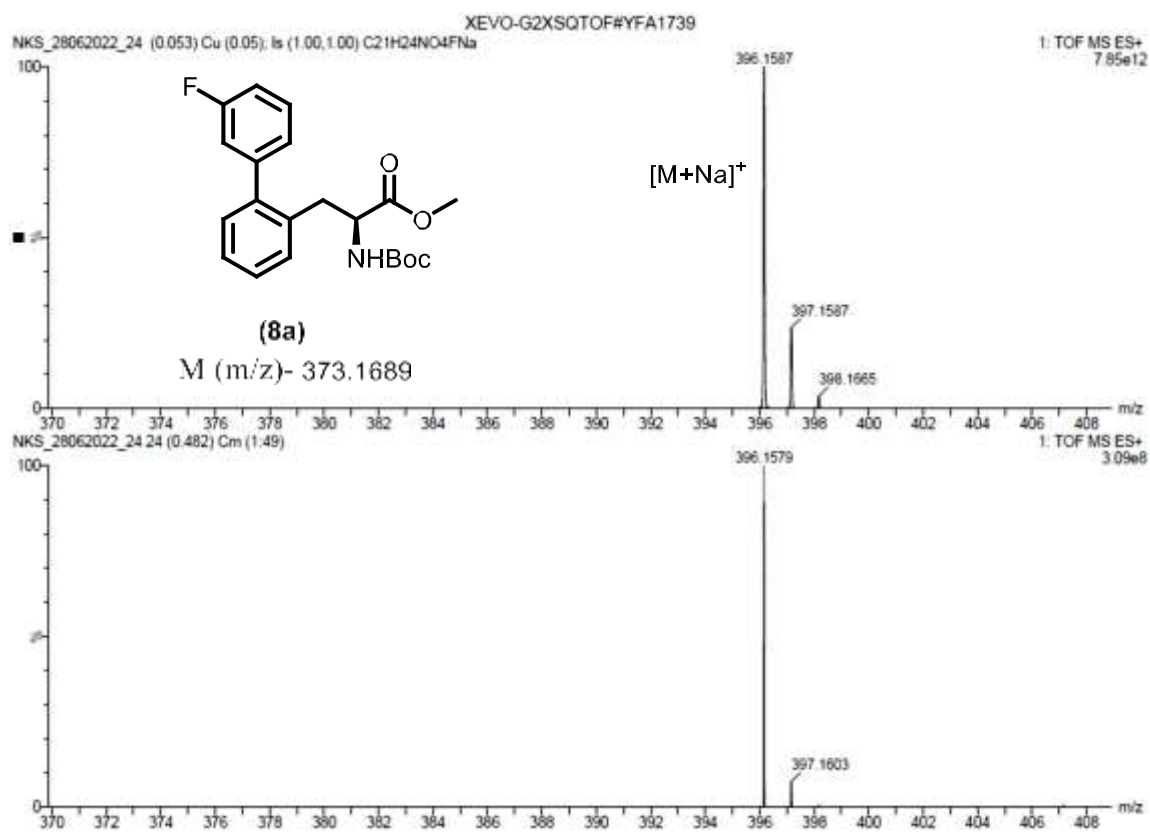

**Fig. S56** ESI-HRMS Spectra of compound **8a**.

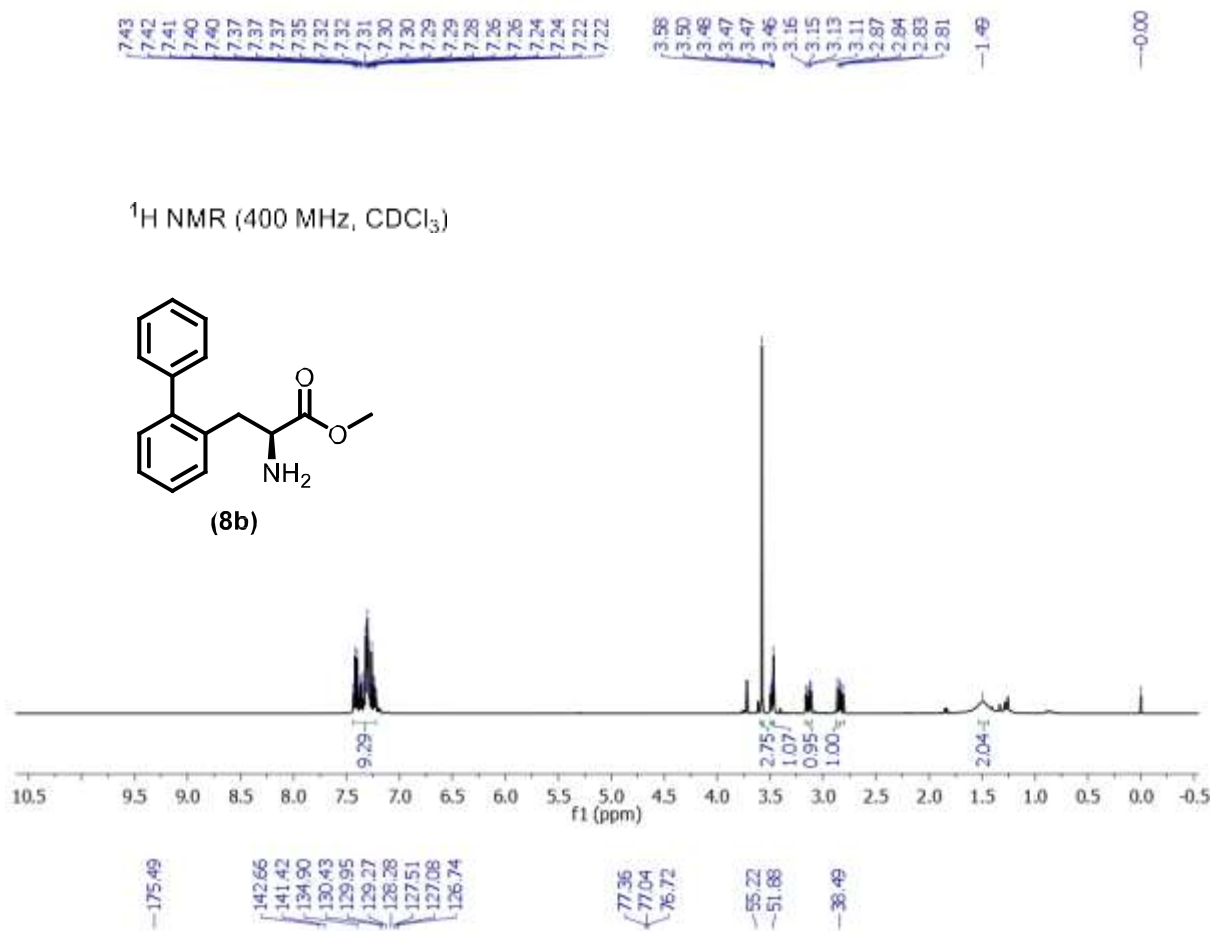

<sup>13</sup>C {<sup>1</sup>H} NMR (101MHz, CDCl<sub>3</sub>)

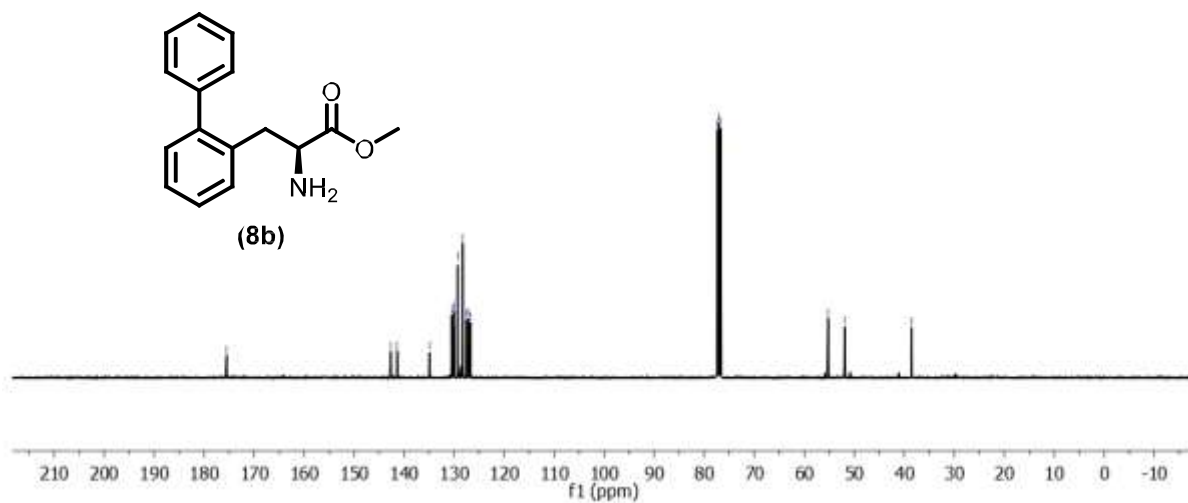

**Fig. S57** <sup>1</sup>H, <sup>13</sup>C {<sup>1</sup>H}, NMR Spectra of compound **8b**.

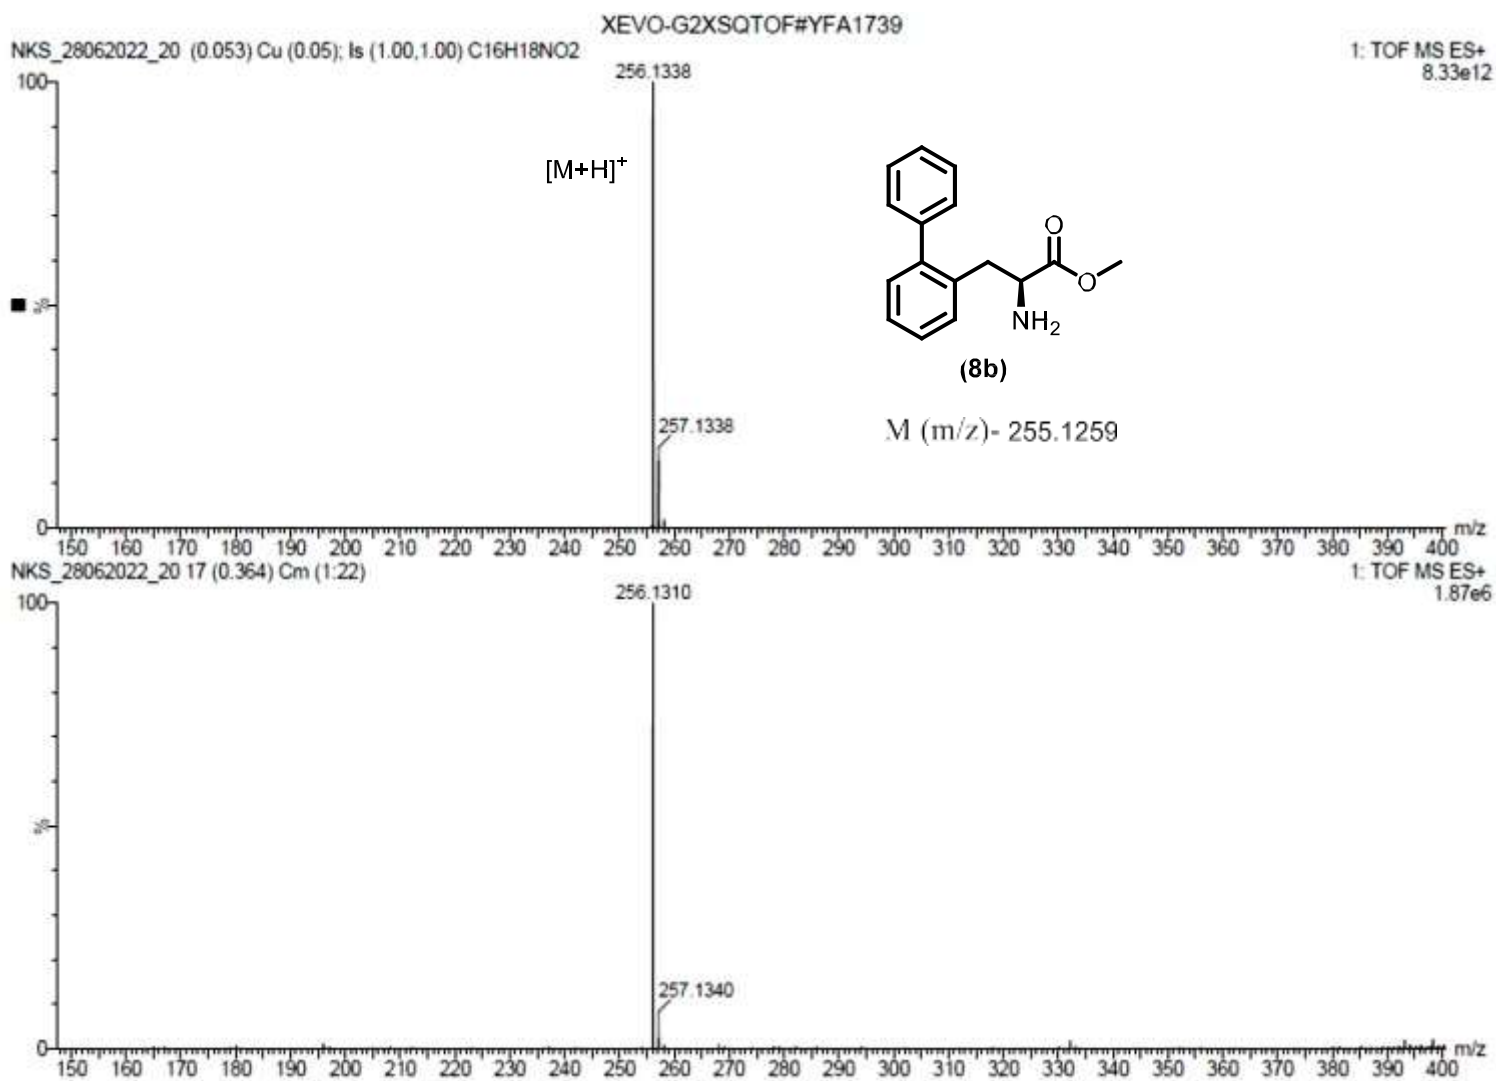

Fig. S58 ESI-HRMS Spectra of compound 8b.

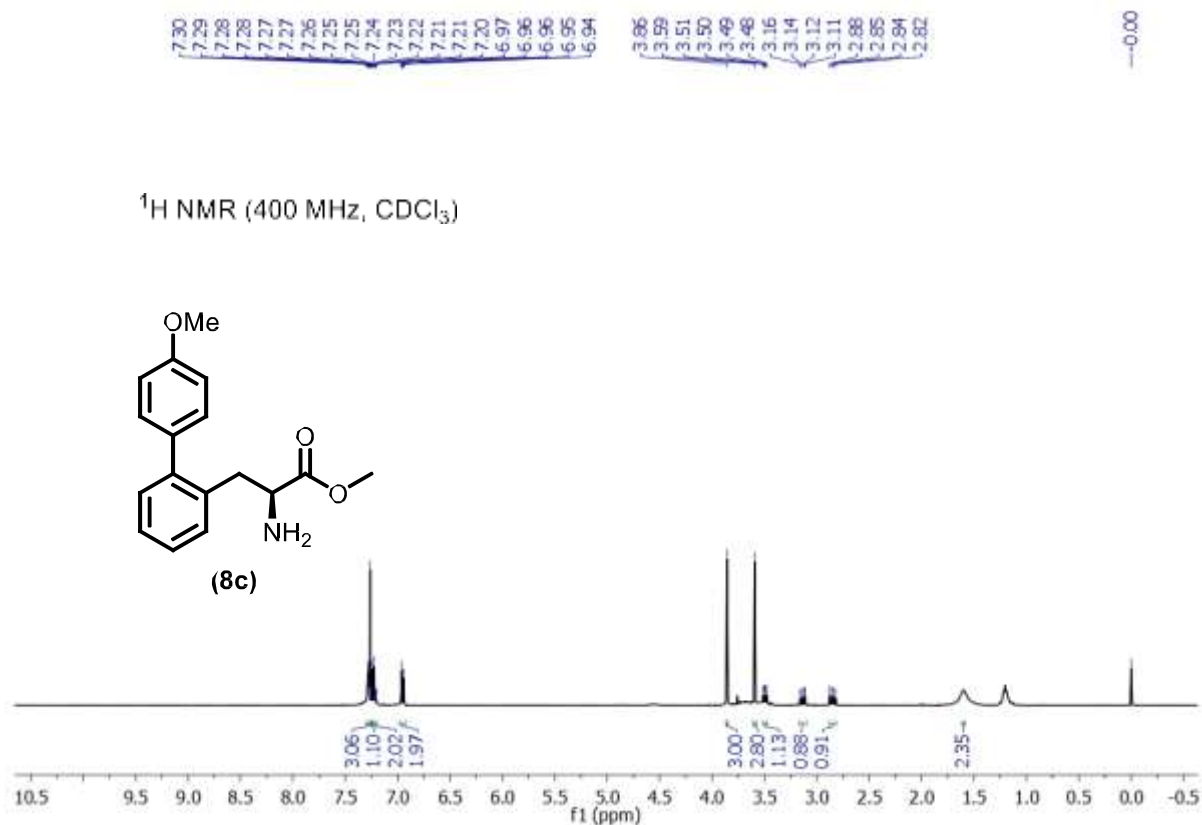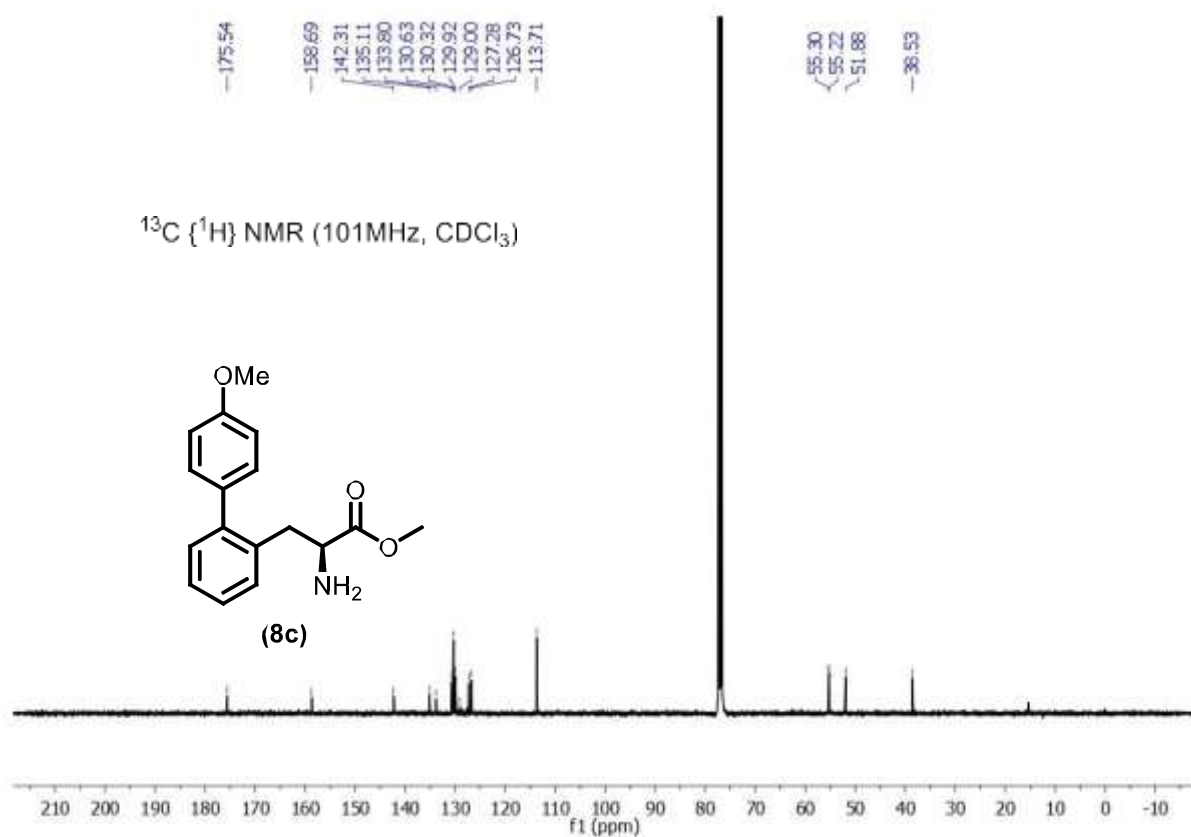

Fig. S59 <sup>1</sup>H, <sup>13</sup>C {<sup>1</sup>H}, NMR Spectra of compound **8c**.

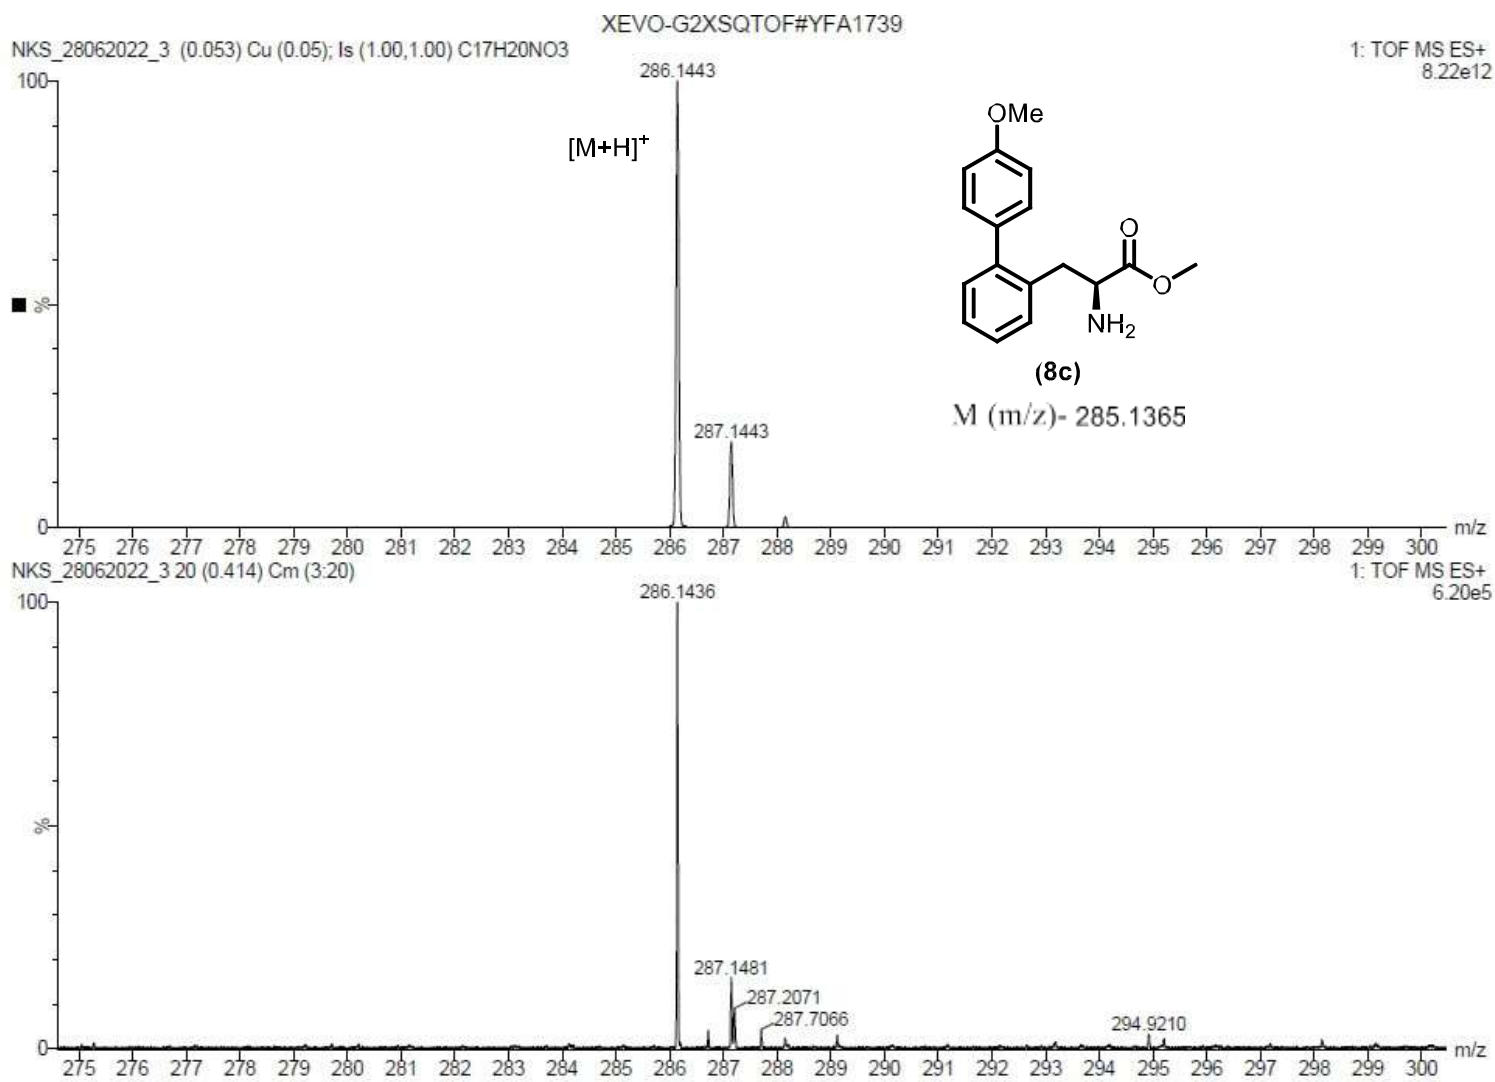

**Fig. S60** ESI-HRMS Spectra of compound **8c**.



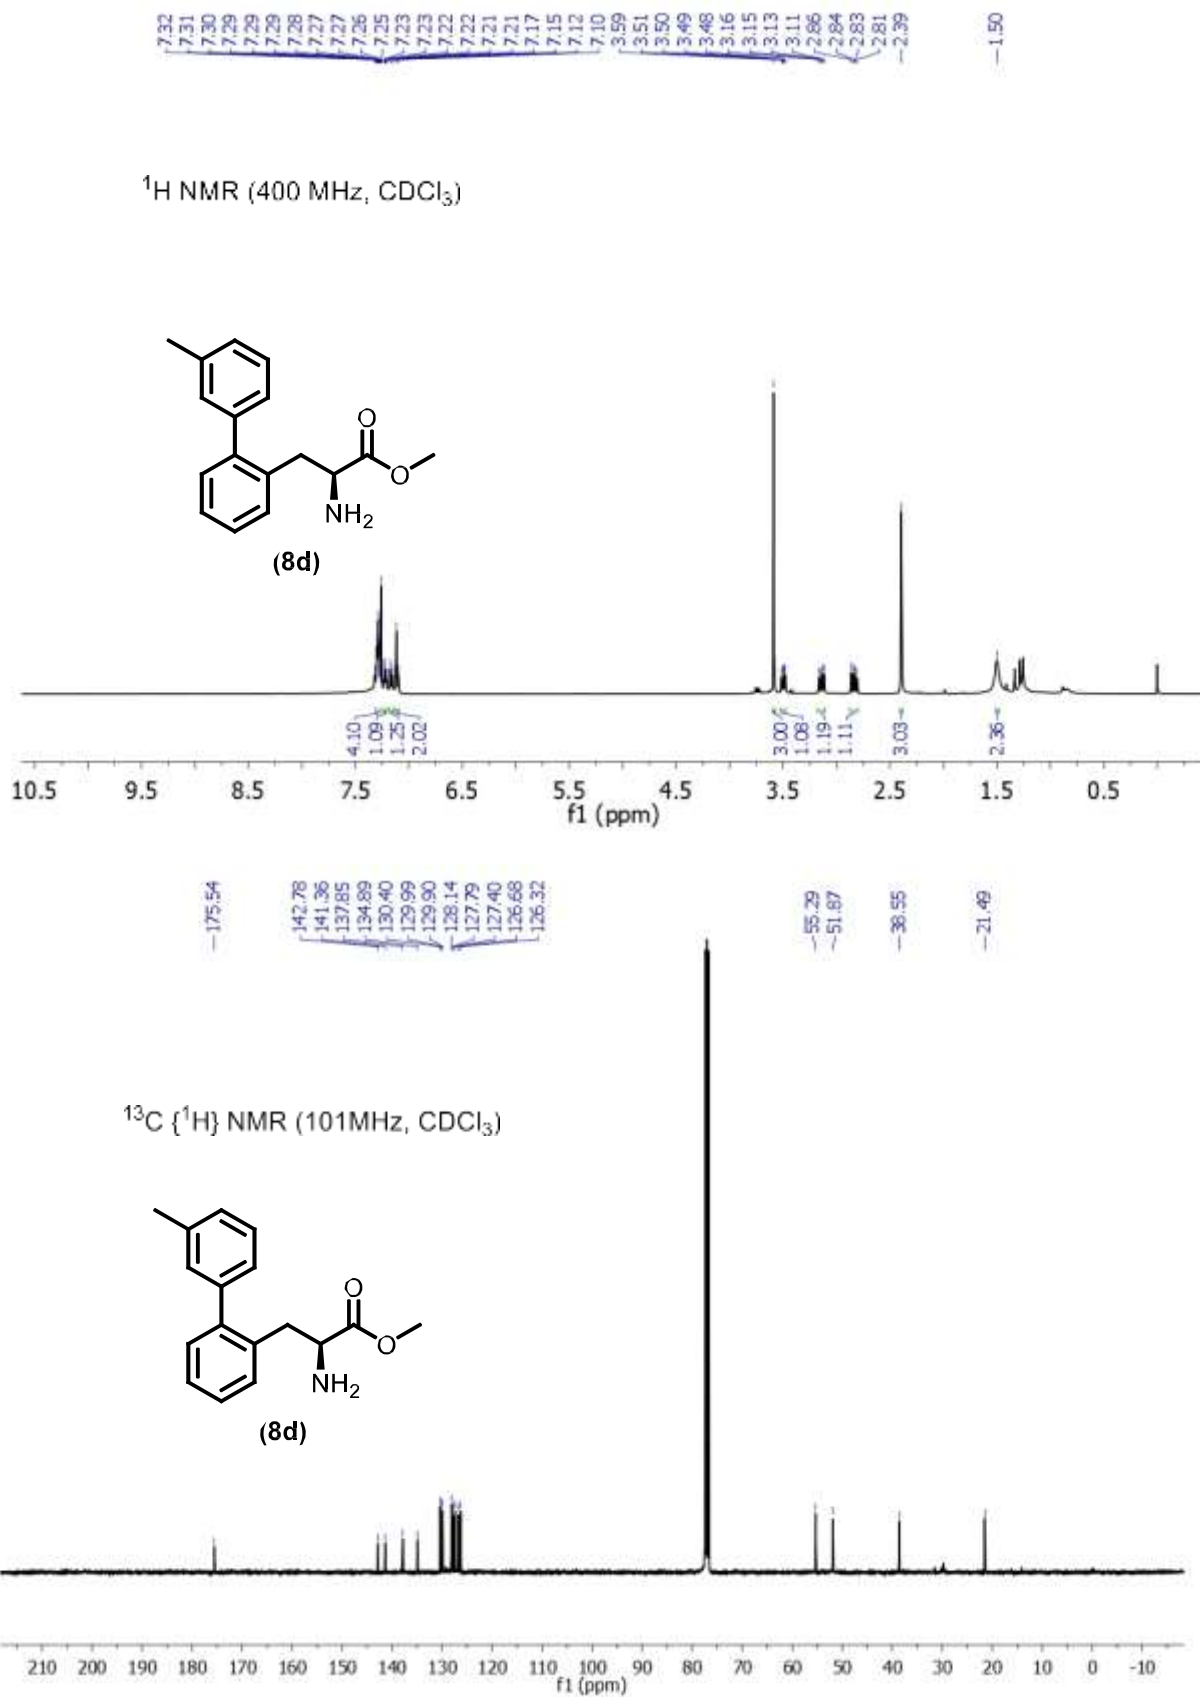

**Fig. S61** <sup>1</sup>H, <sup>13</sup>C {<sup>1</sup>H}, NMR Spectra of compound **8d**.

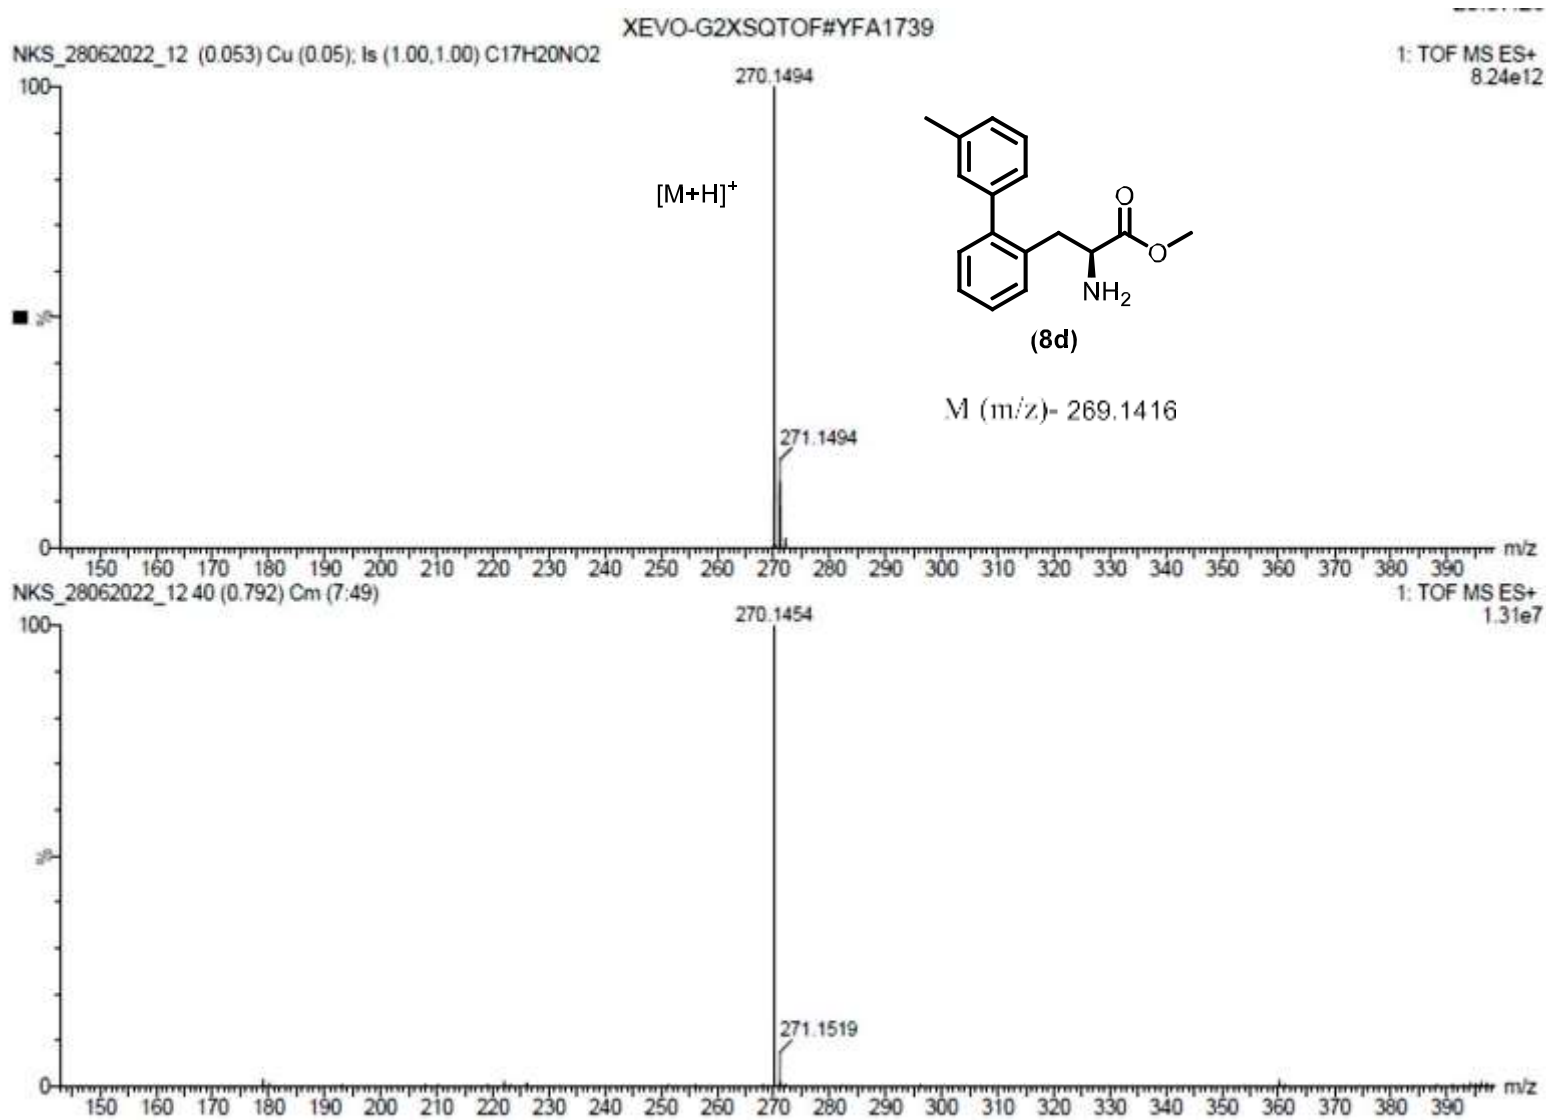

Fig. S62 ESI-HRMS Spectra of compound **8d**.

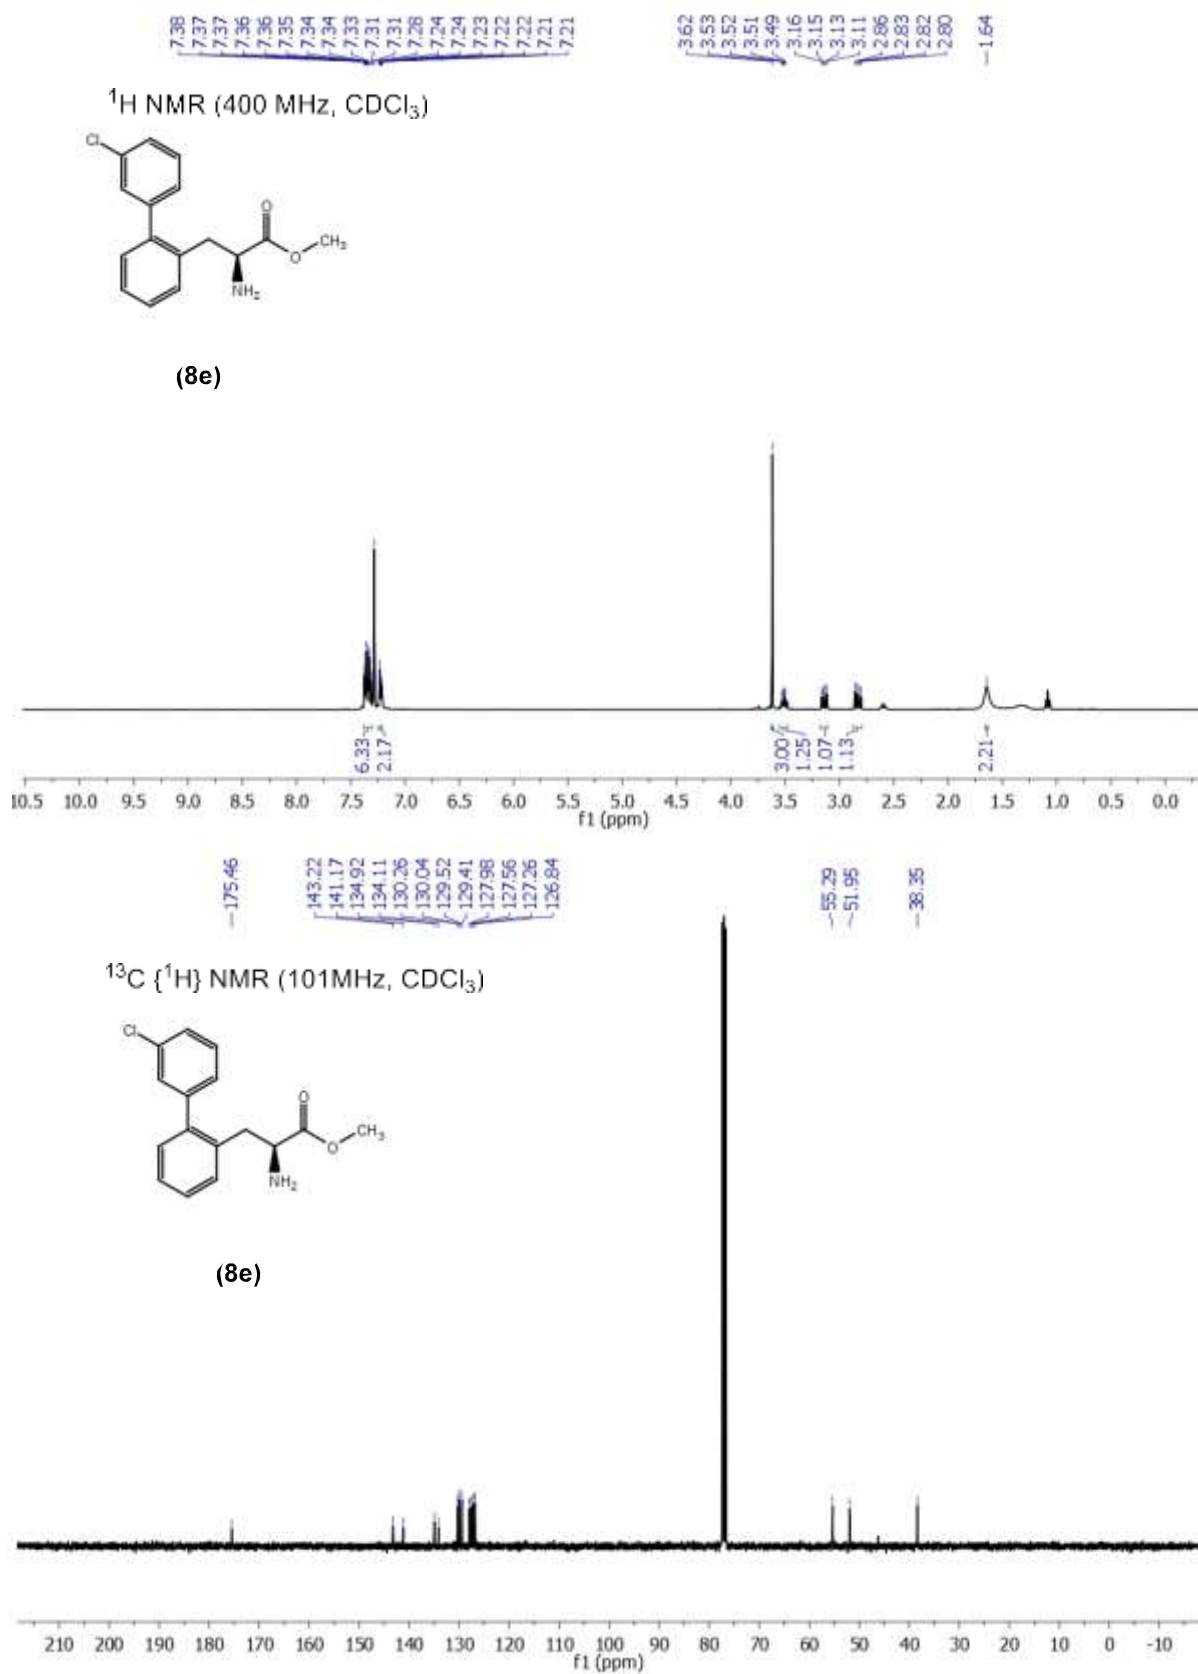

**Fig. S63** <sup>1</sup>H, <sup>13</sup>C {<sup>1</sup>H}, NMR Spectra of compound **8e**.

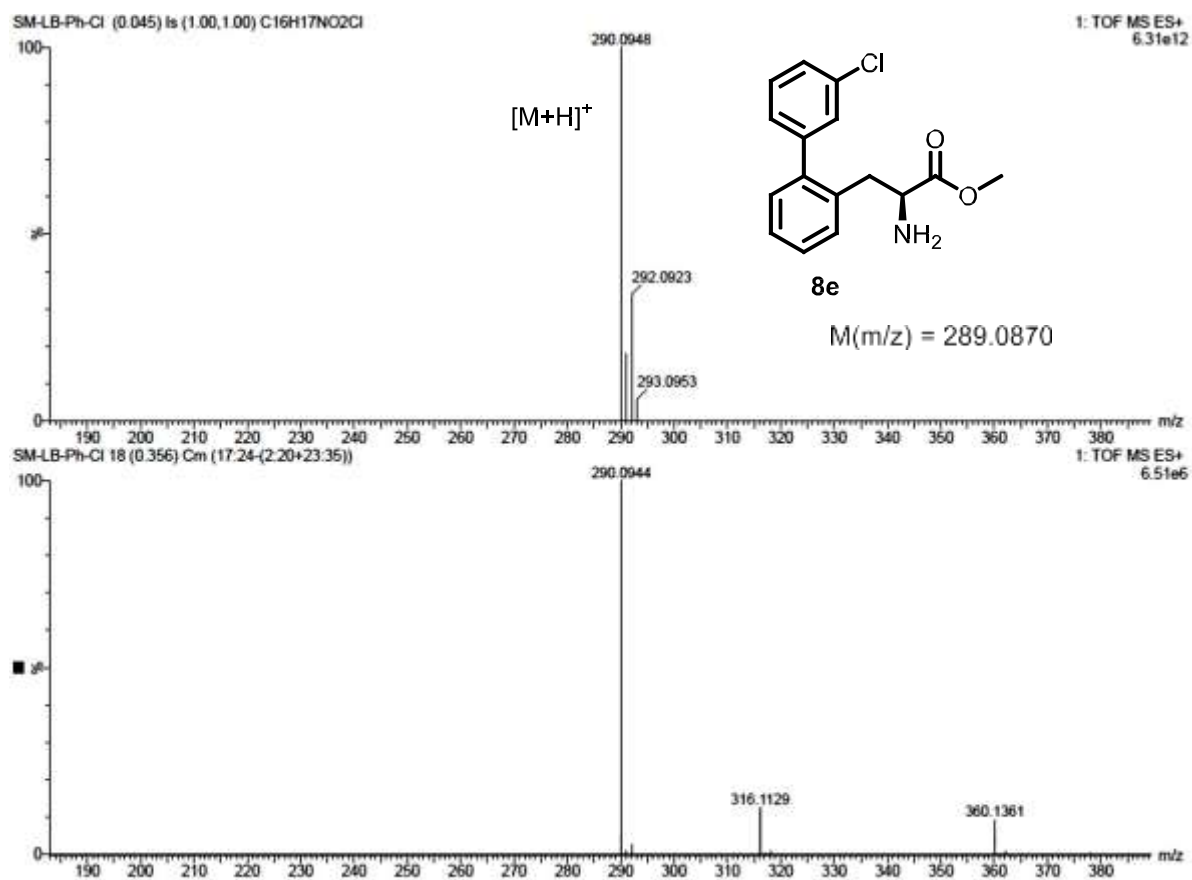

Fig. S64 ESI-HRMS Spectra of Compound 8e.

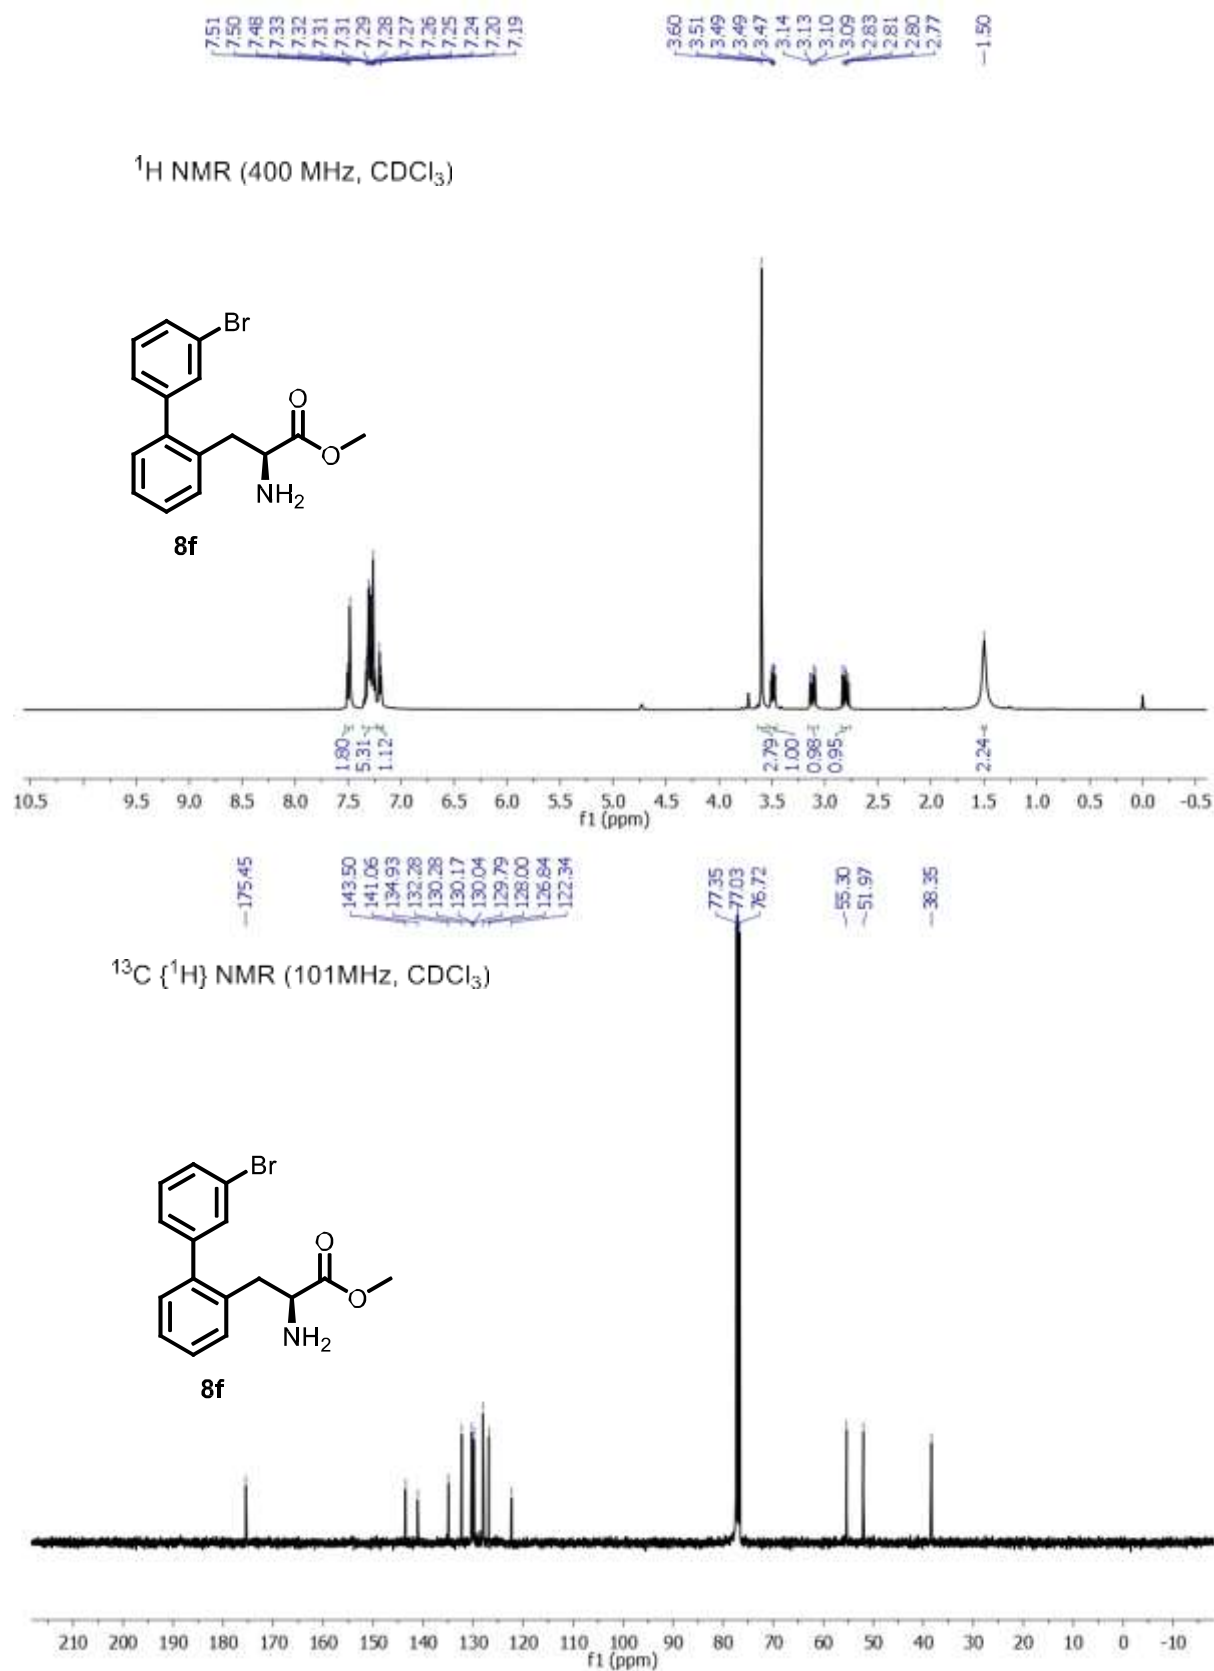

**Fig. S65** <sup>1</sup>H, <sup>13</sup>C {<sup>1</sup>H}, NMR Spectra of compound **8f**.

Fig. S66 ESI-HRMS Spectra of Compound 8f.

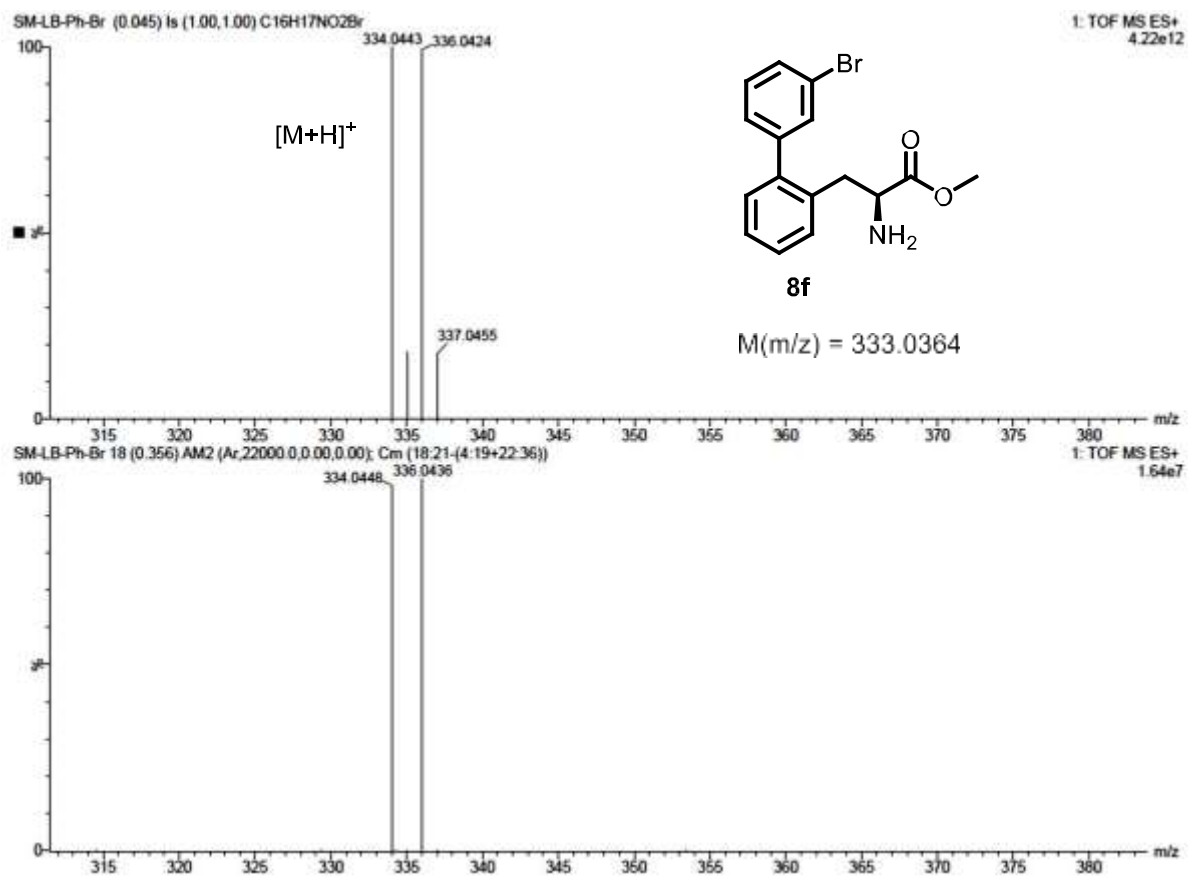

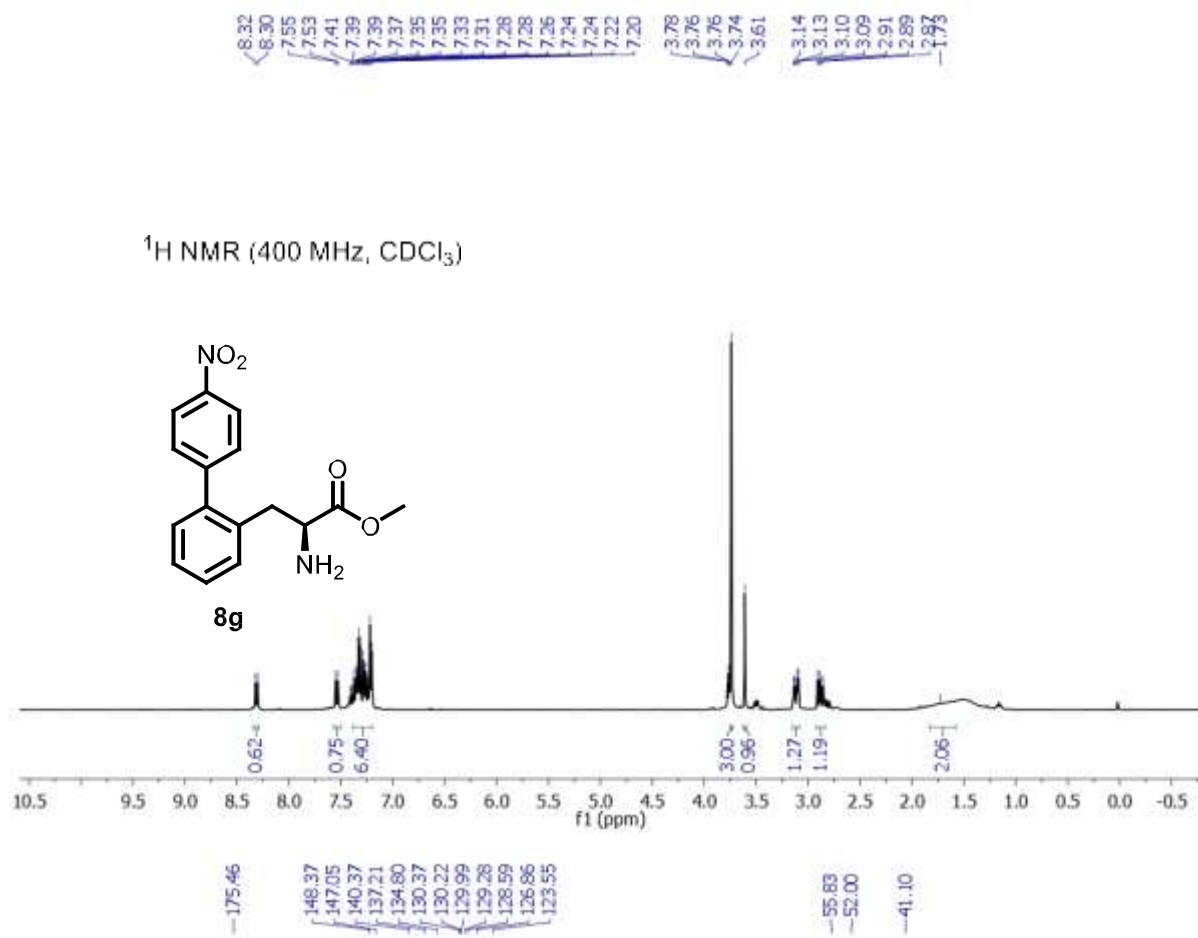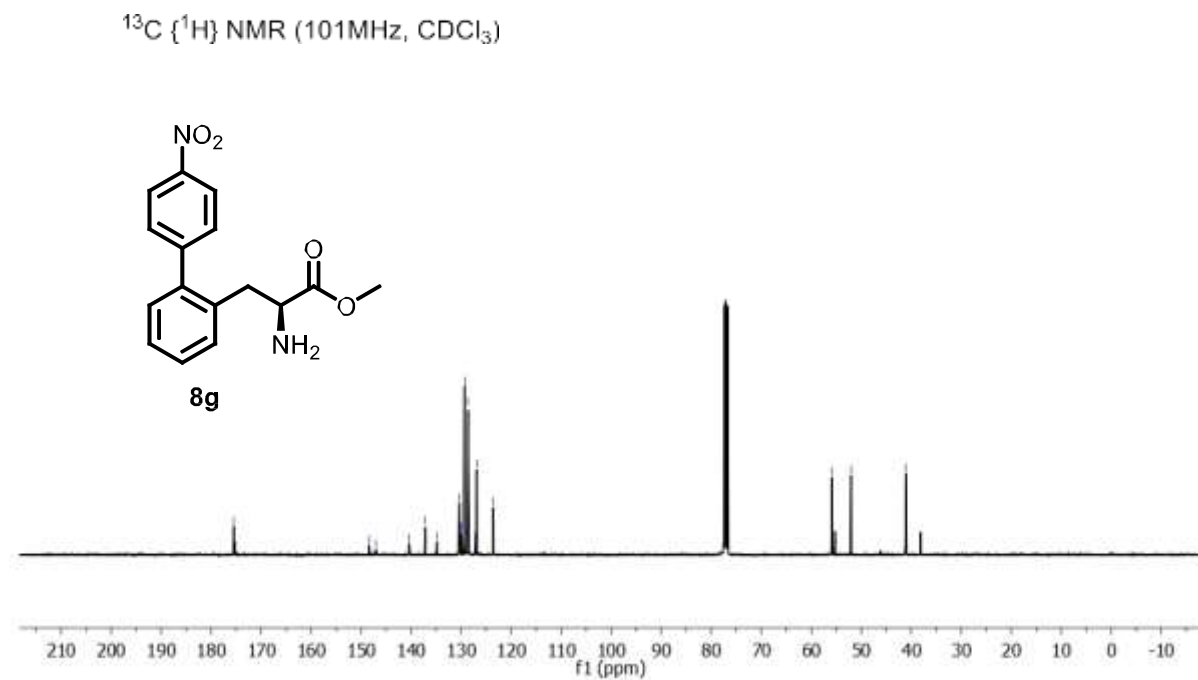

**Fig. S67** <sup>1</sup>H, <sup>13</sup>C {<sup>1</sup>H}, NMR Spectra of compound **8g**.

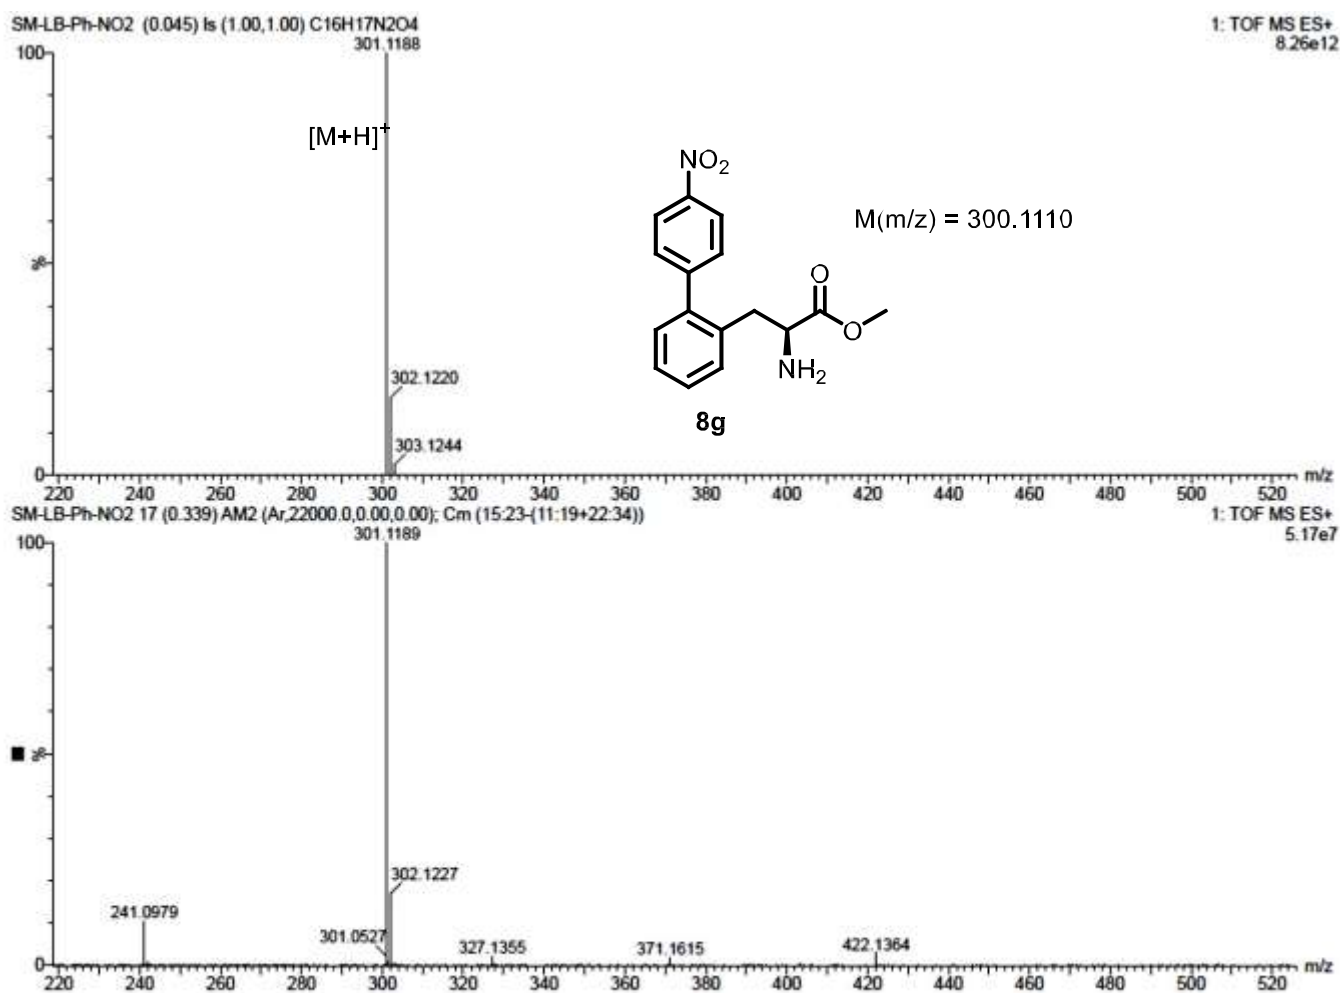

Fig. S68 ESI-HRMS Spectra of Compound **8g**.



### 3. $^1\text{H}$ , NMR Spectra of compound Mosher Amides

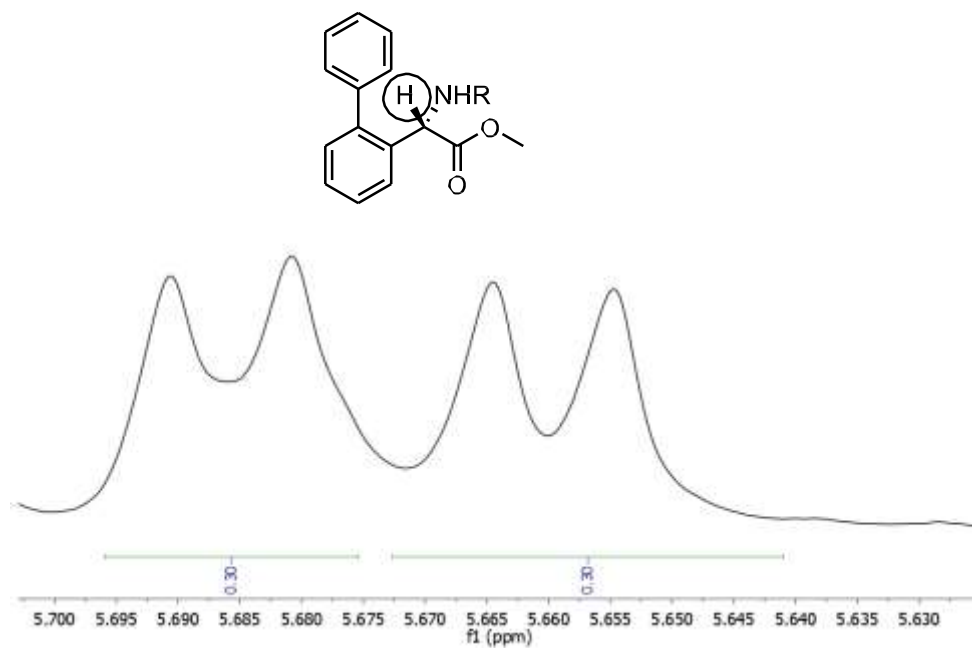

**Fig. S69**  $^1\text{H}$ , NMR Spectra of compound **6a-Mosher Amide** (Area of interest blown up) ee-0%.

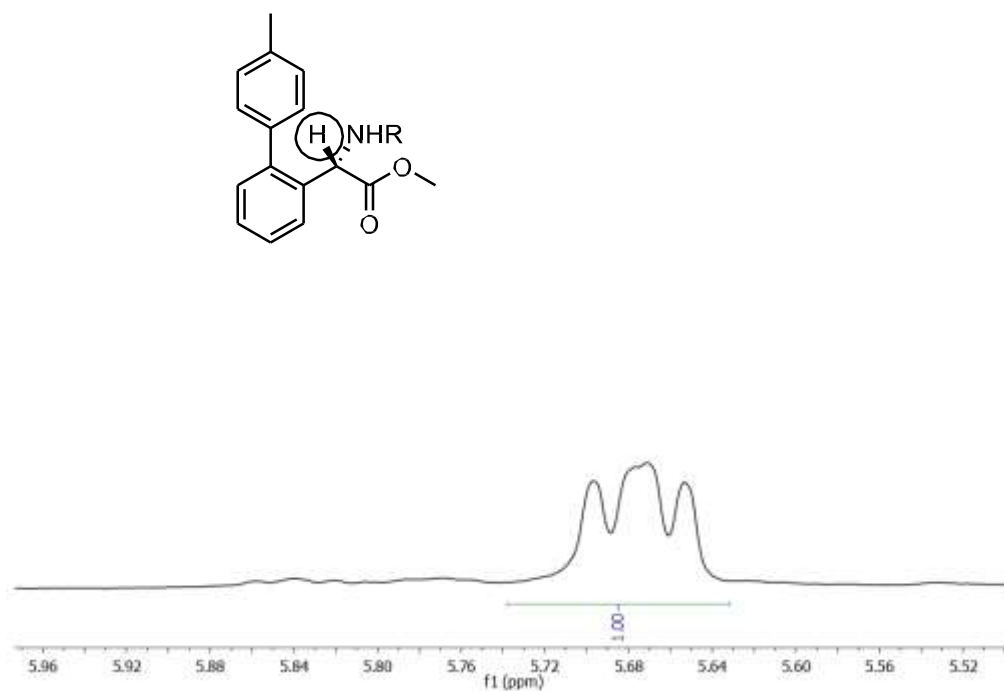

**Fig. S70**  $^1\text{H}$ , NMR Spectra of compound **6b-Mosher Amide** (Area of interest blown up) ee 0%.

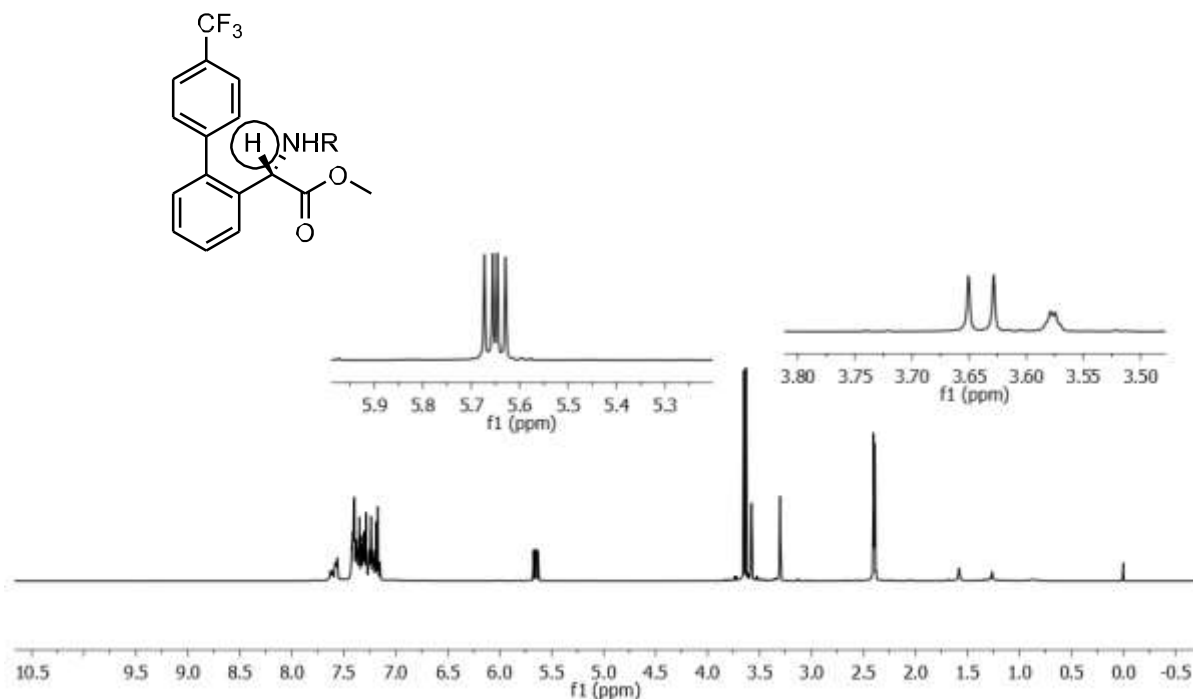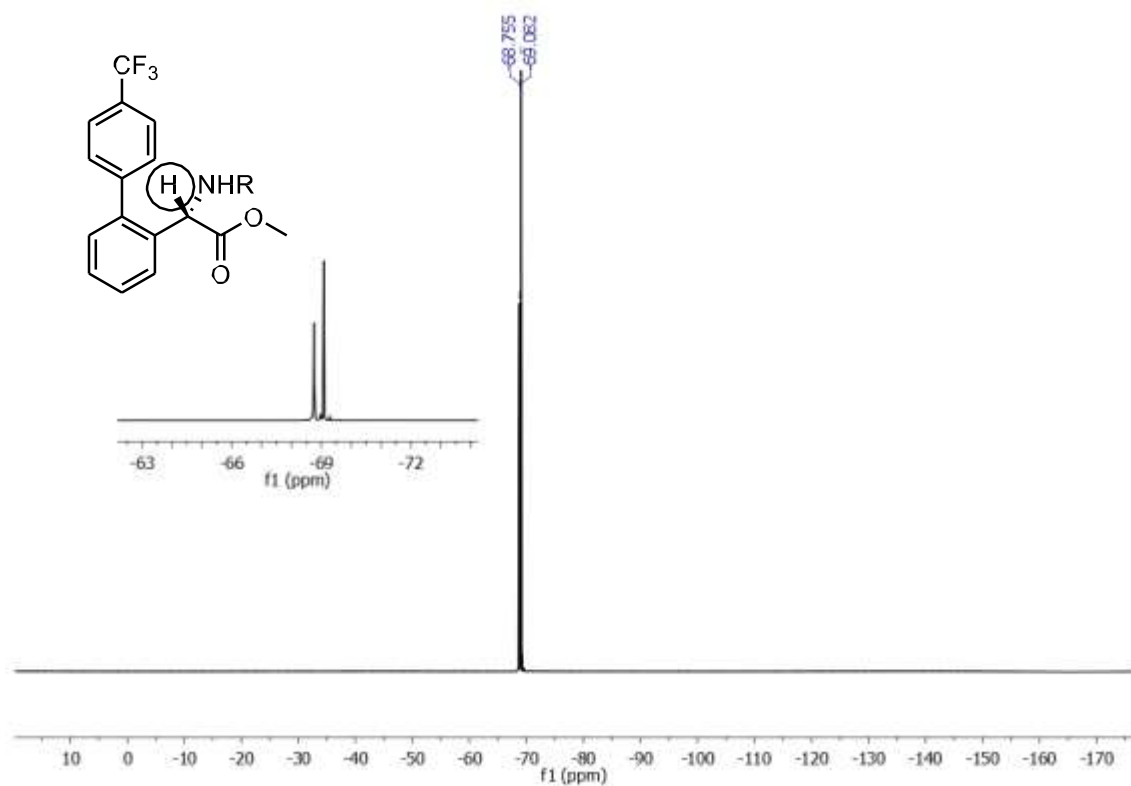

**Fig. S71**  $^1\text{H}$ ,  $^{19}\text{F}$  NMR Spectra of compound **6C-Mosher Amide** (Area of interest blown up) ee-0%.

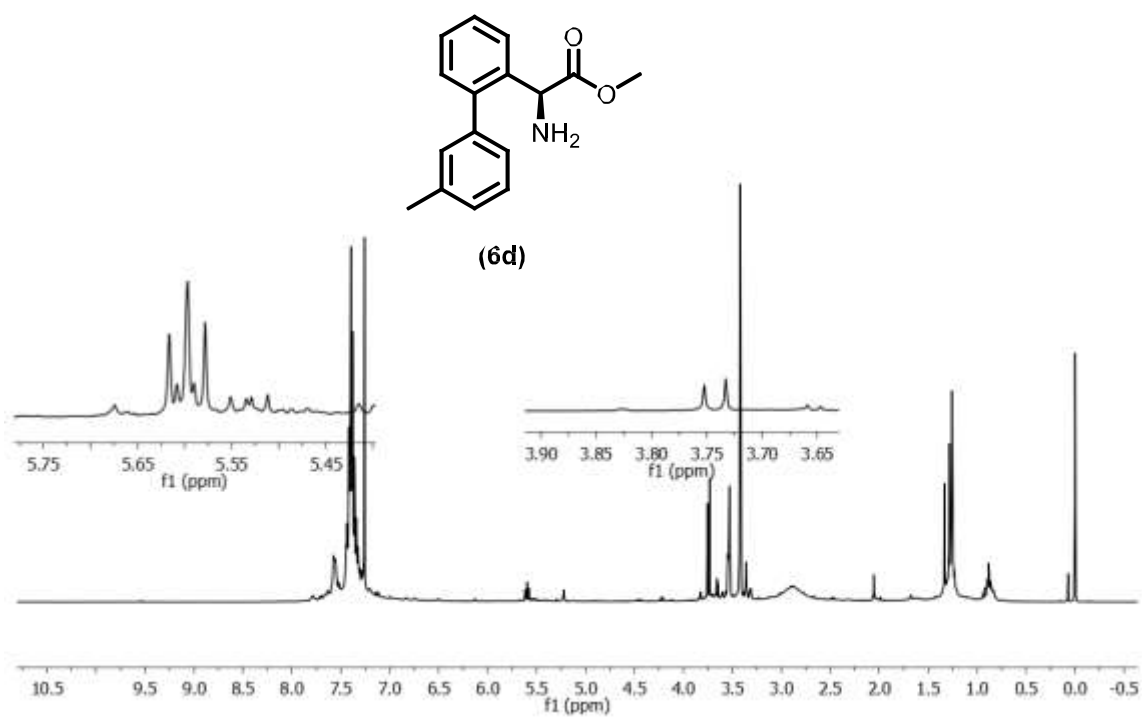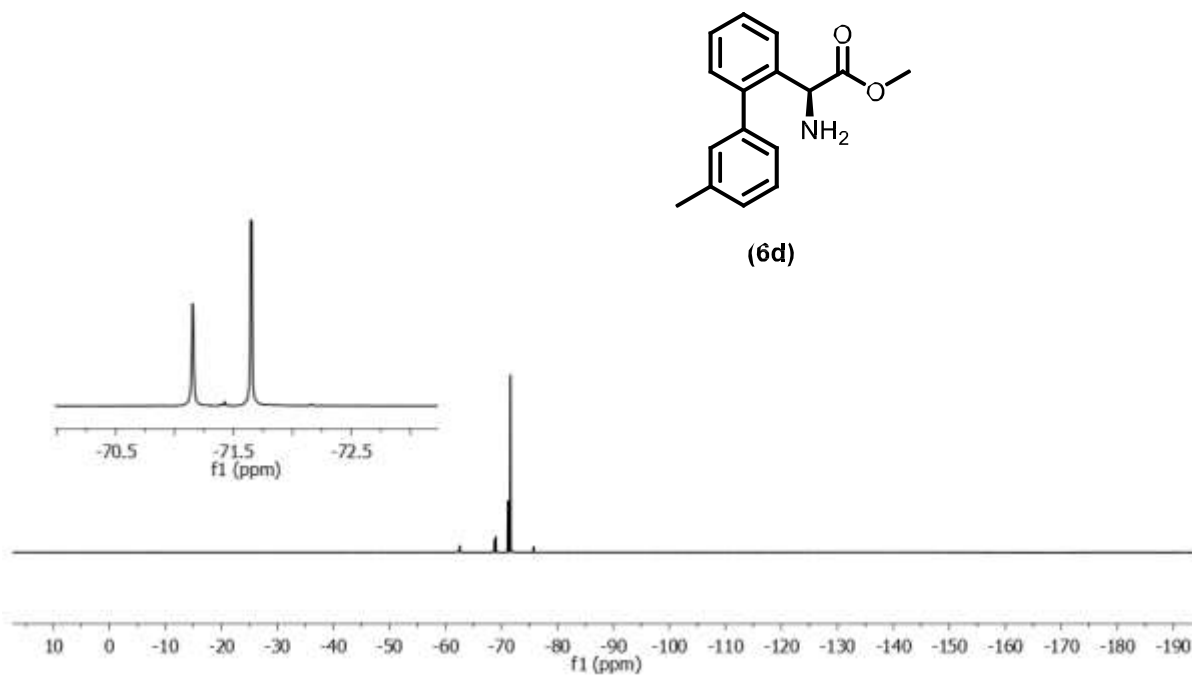

**Fig. S72**  $^1\text{H}$ ,  $^{19}\text{F}$  NMR Spectra of compound 6d-Mosher Amide (Area of interest blown up) ee-0%.

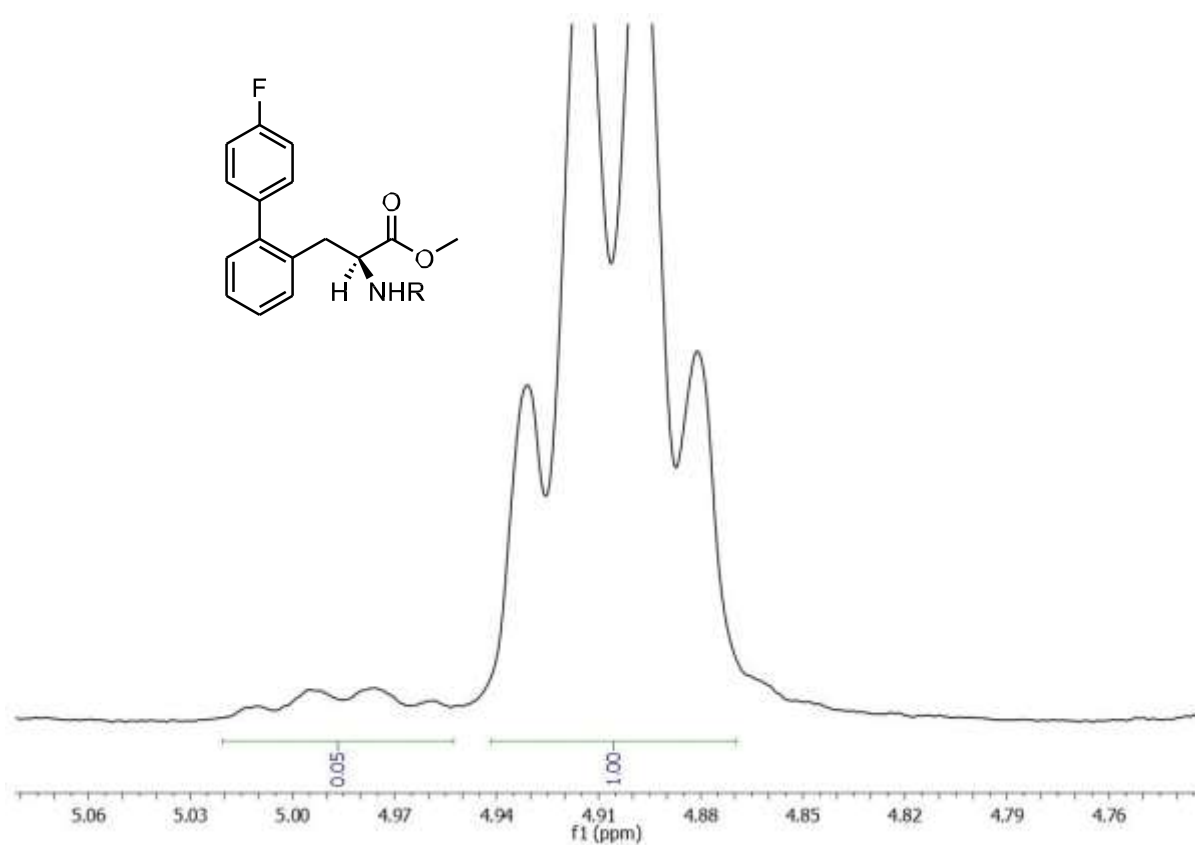

**Fig. S73**  $^1\text{H}$ , NMR Spectra of compound **8a-Mosher Amide** (Area of interest blown up) ee-90%

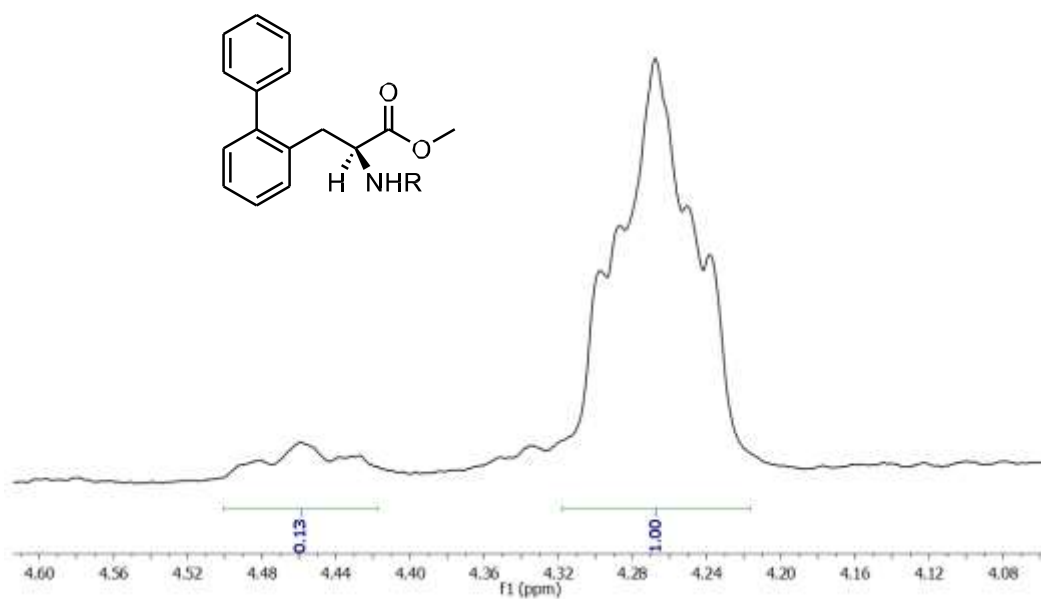

**Fig. S74**  $^1\text{H}$ , NMR Spectra of compound **8b-Mosher Amide** (Area of interest blown up) ee-77%.

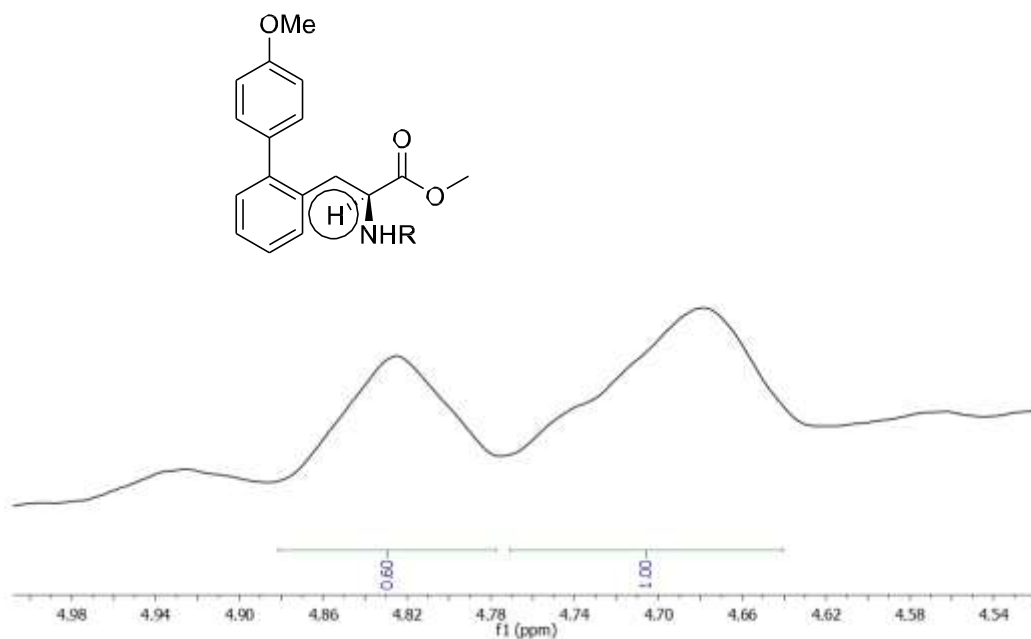

**Fig. S75**  $^1\text{H}$ , NMR Spectra of compound **8b-Mosher Amide** (Area of interest blown up) ee-25%.

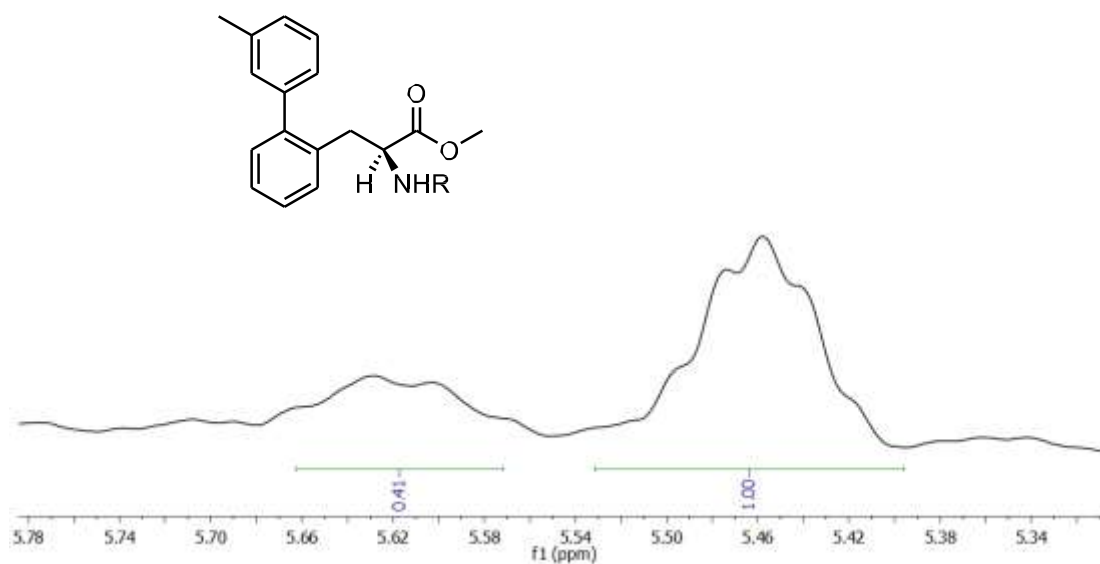

**Fig. S76**  $^1\text{H}$ , NMR Spectra of compound **8d-Mosher Amide** (Area of interest blown up) ee-41%.

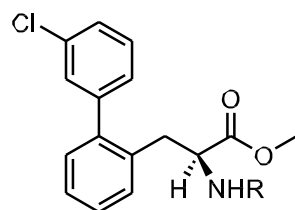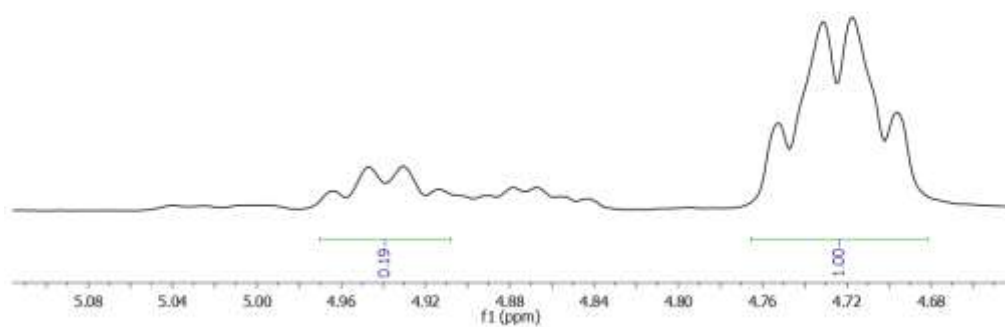

**Fig. S77**  $^1\text{H}$ , NMR Spectra of compound **8e-Mosher Amide** (Area of interest blown up) ee-68%.

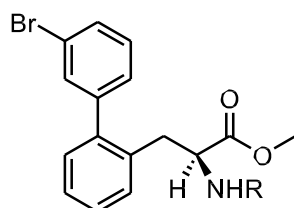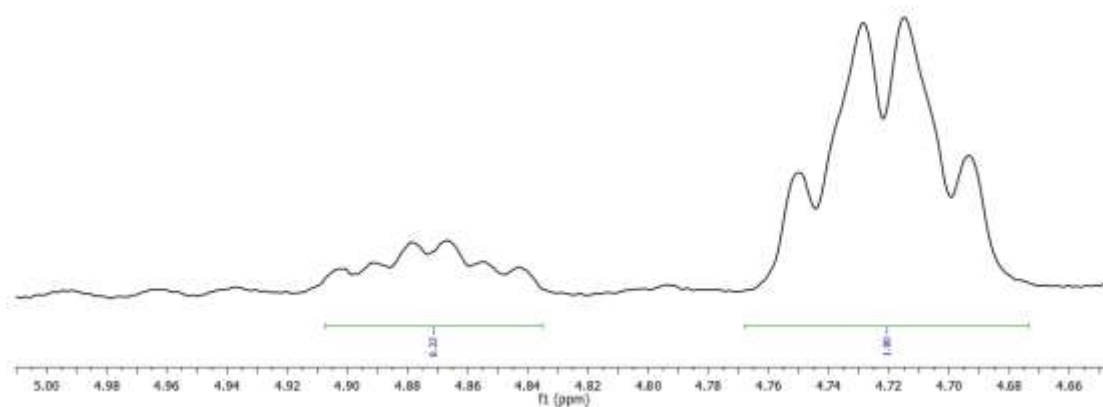

**Fig. S78**  $^1\text{H}$ , NMR Spectra of compound **8f-Mosher Amide** (Area of interest blown up) ee-64%.

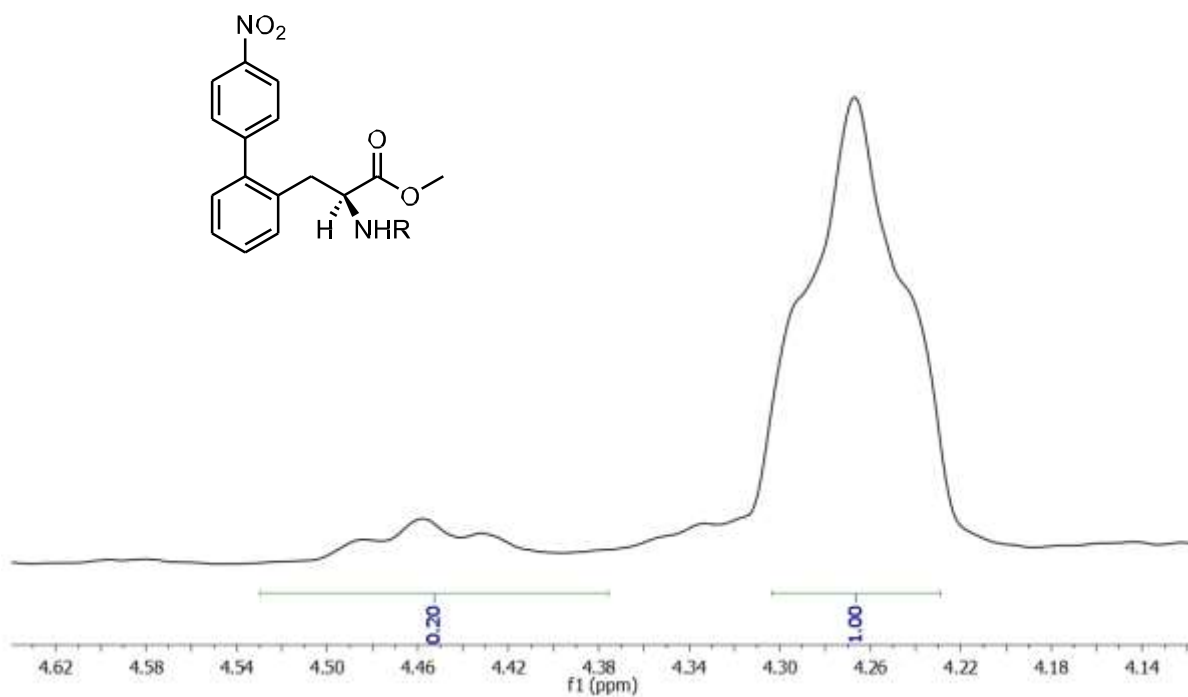

**Fig. S79**  $^1\text{H}$ , NMR Spectra of compound **8g-Mosher Amide** (Area of interest blown up) ee-66%.

#### 4. Crude NMR analysis of imine formation

In a sealed tube both benzyl amine and diethoxy ethyl proline (DEP) was taken and heated at 90°C. After 1h reaction mixture was concentrated and taken for NMR in CDCl<sub>3</sub>. From crude NMR analysis a triplet of 3 proton is clearly showing dissociation of -OEt group from DEP and 1 extra proton in aromatic region due to formation of imine. Formation of aldehyde intermediate was confirmed by HRMS spectrometry.

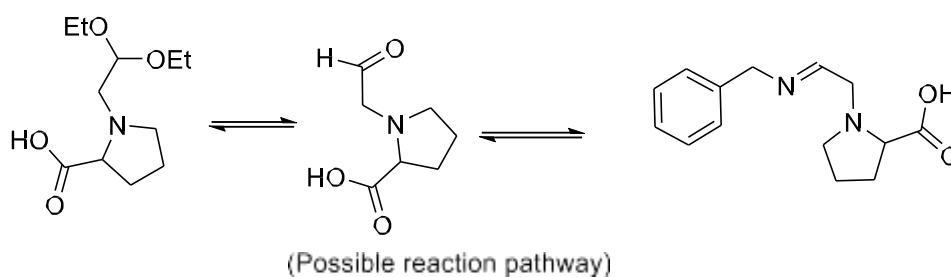

(2-oxoethyl)-L-proline

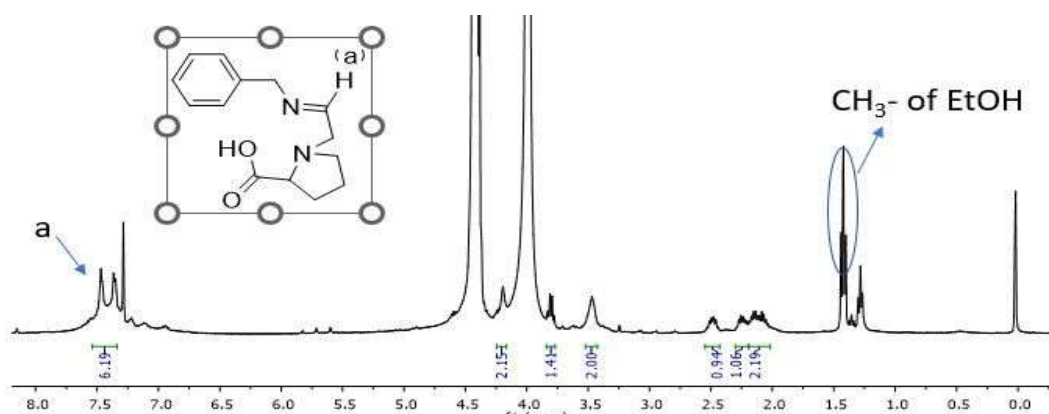



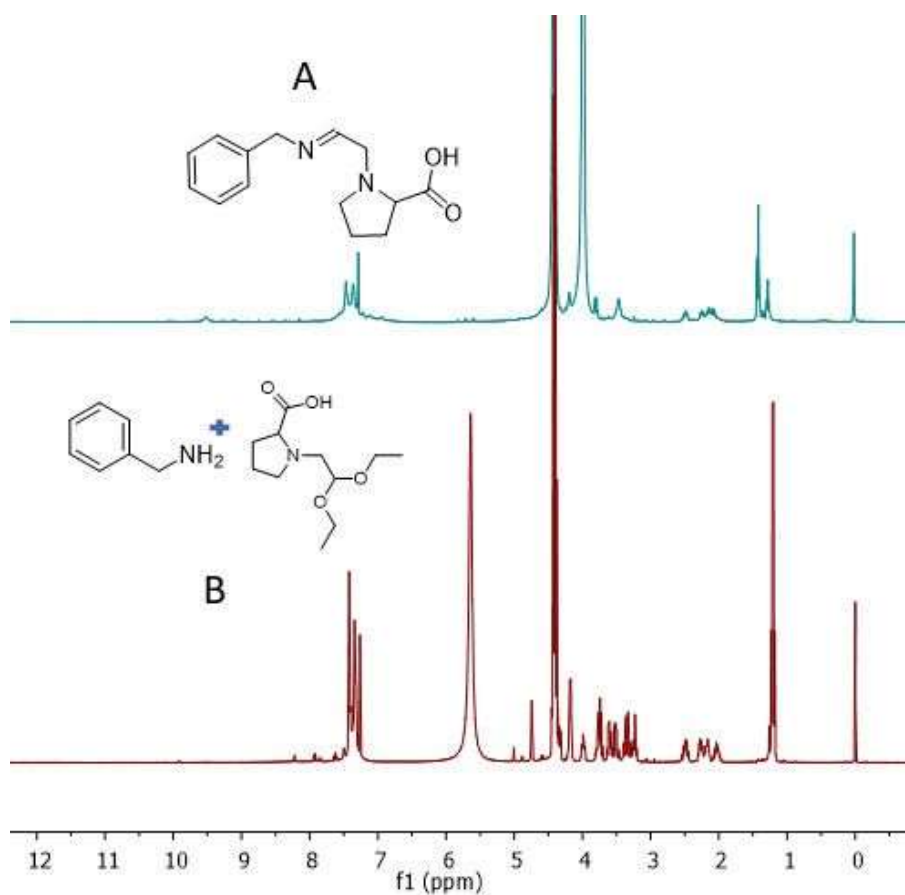

(i) A- After 1h of heating at 90<sup>0</sup>C (ii) B- Just after mixing both reagents.

**Fig. S80** <sup>1</sup>H, NMR Spectral co-relation study of imine formation.

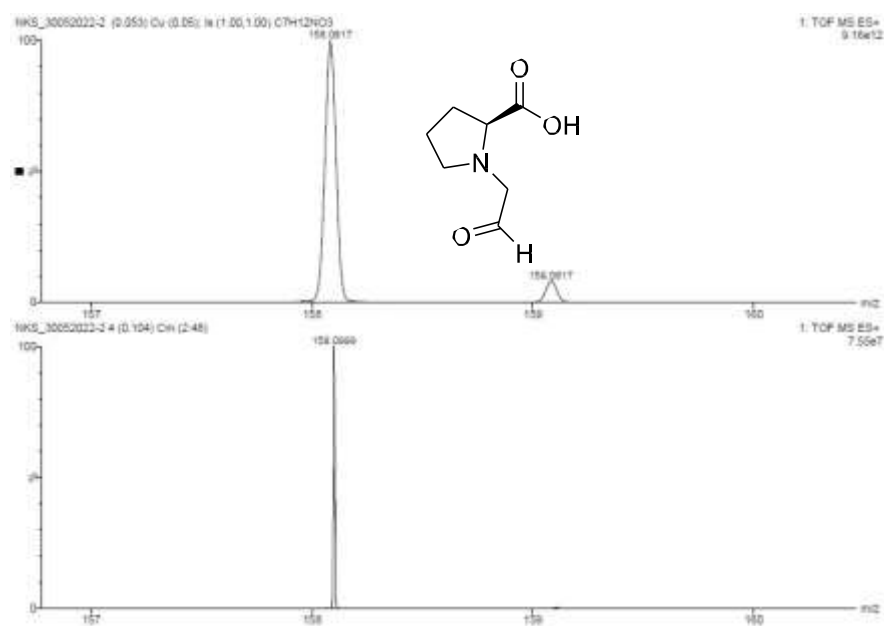

**Fig. S81** ESI-HRMS Spectra of (2-oxoethyl) L-proline.
